# Supplementary material for: Triflic imide-catalyzed cascade cycloaddition and Friedel–Crafts reaction of diarylvinylidenecyclopropanes with ethyl 5,5-diarylpenta-2,3,4-trienoate
Source: Royal Society of Chemistry journal article supplement (doi:10.1039/b903965a), 2009-01-01
Supplement: b903965a.pdf [file b903965a.pdf]

## Supporting Information

### Triflic Imide-Catalyzed Cycloaddition and Friedel-Crafts Reaction of Diarylvinyldenecyclopropanes and Ethyl 5,5-Diarylpenta-2,3,4-trienoate

*Wei Li and Min Shi\**

State Key Laboratory of Organometallic Chemistry,  
Shanghai Institute of Organic Chemistry,  
Chinese Academy of Sciences, 354 Fenglin Lu, Shanghai 200032 China.

[Mshi@mail.sioc.ac.cn](mailto:Mshi@mail.sioc.ac.cn). Fax 86-21-64166128

#### Content

|                                                              |         |
|--------------------------------------------------------------|---------|
| General Remarks                                              | S2      |
| Spectroscopic data of products <b>2a</b> , <b>2b</b>         | S2-S5   |
| Spectroscopic data of products <b>3a-3c</b> and <b>3f-3i</b> | S5-S17  |
| Spectroscopic data of products <b>4c-4e</b>                  | S17-S22 |
| The X-ray crystal structure of <b>3a</b>                     | S24-S34 |
| The X-ray crystal structure of <b>4c</b>                     | S35-S46 |
| The X-ray crystal structure of <b>4e</b>                     | S47-S58 |

**General remarks.**  $^1\text{H-NMR}$  spectra were recorded on a 300 MHz spectrometer in  $\text{CDCl}_3$  using tetramethylsilane as the internal standard. Infrared spectra were measured on a spectrometer. Mass spectra were recorded by EI method, and HRMS was measured on Kratos Analytical Concept mass spectrometer (EI), and IonSpec 4.7 Tesla FFMS (MALDI). Satisfactory CHN microanalyses were obtained with an analyzer. Melting points are uncorrected. All reactions were monitored by TLC with silica gel coated plates. Flash Column Chromatography was carried out using 300-400 mesh silica gel at increased pressure.

### General Procedure for the Synthesis of **1a** and **1b**.

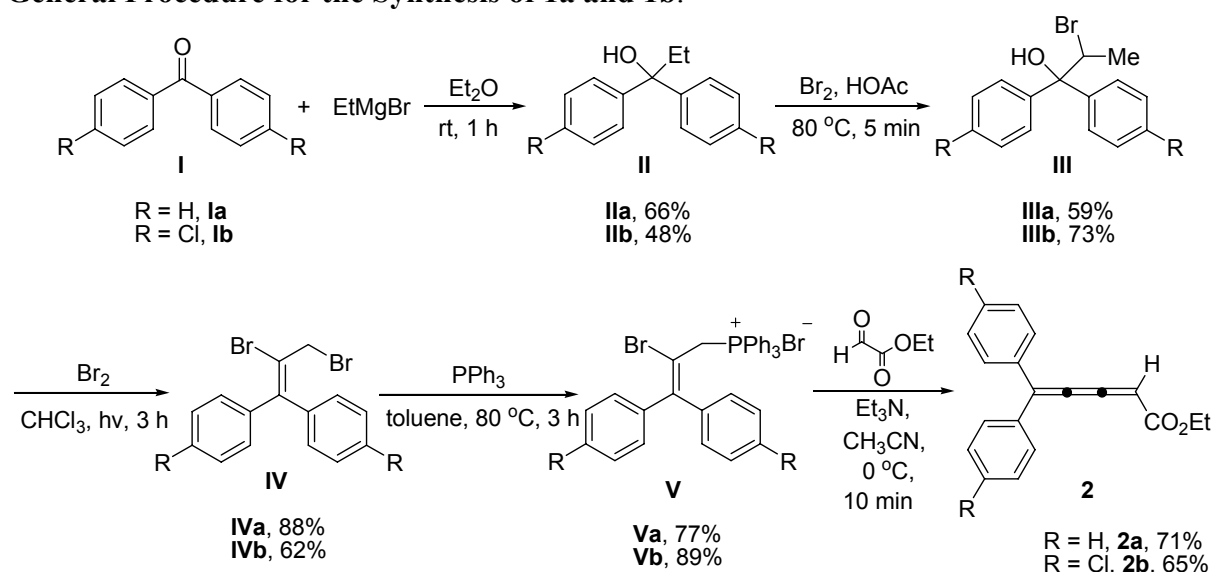

According to the previous literature,<sup>1</sup> the compound **Va** was synthesized starting from **1a**. In a 25 mL of RB flask, **Va** (1.0 g, 1.63 mmol) was dissolved in 10 mL of  $\text{CH}_3\text{CN}$  and the solution was cooled to 0 °C. Ethyl glyoxylate (449 mg of its 50% solution in toluene, 2.45 mmol) was added at 0 °C, then  $\text{Et}_3\text{N}$  (329 mg, 3.26 mmol) was added dropwise. The mixture was stirred at 0 °C for 5 minutes and the mixture was purified by flash column chromatography ( $\text{SiO}_2$ , eluent: Petroleum ether) without removal of the solvent. The solvent was removed under reduced pressure from the collected eluents without heating to yield the corresponding product **2a** (320 mg, 71%) as a yellow powder. Using the similar procedure, compound **2b** could be synthesized.

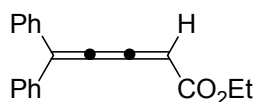

**ethyl 5,5-diphenylpenta-2,3,4-trienoate 2a.**

A yellow solid, Mp: 83-85 °C. <sup>1</sup>H NMR (CDCl<sub>3</sub>, 300 MHz, TMS) δ 1.36 (t, 3H, *J* = 7.2 Hz), 4.25 (q, 2H, *J* = 7.2 Hz), 5.81 (s, 1H), 7.40-7.44 (m, 6H), 7.55-7.58 (m, 2H), 7.67-7.70 (m, 2H); <sup>13</sup>C NMR (CDCl<sub>3</sub>, 75 MHz, TMS) δ 14.2, 60.8, 96.8, 128.5, 129.6, 129.7, 130.0, 134.8, 136.9, 137.2, 154.5, 165.5, 168.8; IR (CH<sub>2</sub>Cl<sub>2</sub>): ν 3056, 2980, 2925, 2359, 2341, 2053, 1733, 1699, 1489, 1446, 1365, 1329, 1243, 1185, 1150, 757, 692 cm<sup>-1</sup>; MS (EI) *m/z* (%): 276 [M<sup>+</sup>] (73.2), 202 (100.0), 204 (78.0), 203 (73.5), 276 (73.2), 231 (25.7), 201 (25.1), 200 (21.5), 101 (17.8); HRMS (EI) Calcd. for C<sub>19</sub>H<sub>16</sub>O<sub>2</sub> (M<sup>+</sup>) requires 276.1150, Found: 276.1153.

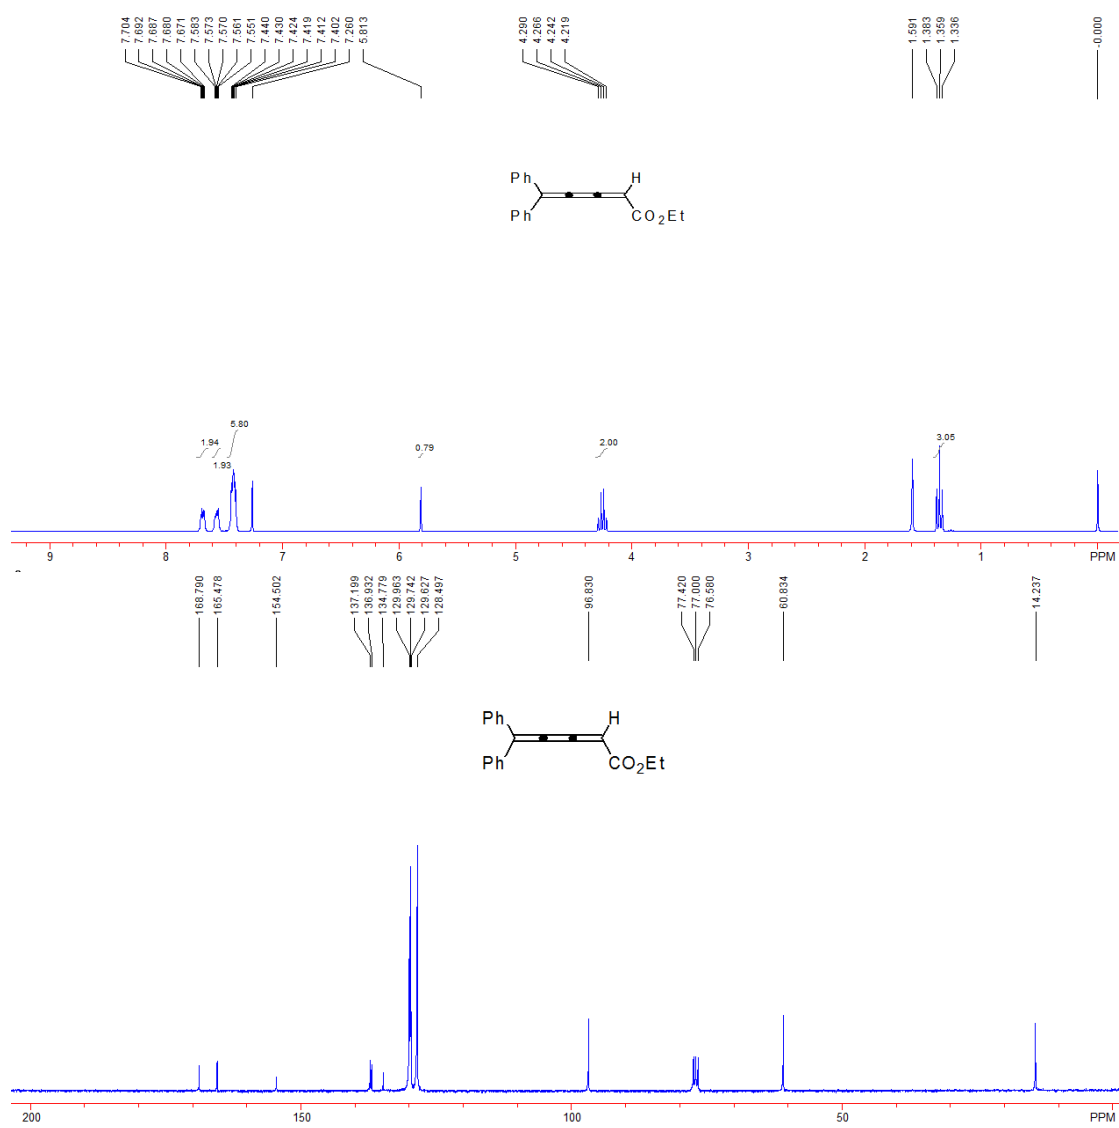

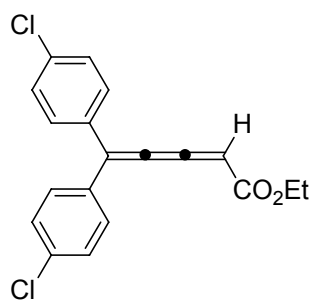

**ethyl 5,5-bis(4-chlorophenyl)penta-2,3,4-trienoate 2b.**

A yellow solid, Mp: 87-89 °C.  $^1\text{H}$  NMR ( $\text{CDCl}_3$ , 300 MHz, TMS)  $\delta$  1.36 (t, 3H,  $J = 6.9$  Hz), 4.25 (q, 2H,  $J = 6.9$  Hz), 5.85 (s, 1H), 7.37-7.41 (m, 4H), 7.45-7.48 (m, 2H), 7.56-7.59 (m, 2H);  $^{13}\text{C}$  NMR ( $\text{CDCl}_3$ , 75 MHz, TMS)  $\delta$  14.3, 61.0, 98.1, 128.90, 128.94, 130.8, 131.0, 131.7, 135.0, 135.4, 135.9, 136.1, 155.0, 165.1, 168.2; IR ( $\text{CH}_2\text{Cl}_2$ ):  $\nu$  3053, 2980, 2359, 2341, 2053, 1702, 1585, 1488, 1405, 1366, 1322, 1300, 1244, 1189, 1152, 1092, 1012, 833, 749  $\text{cm}^{-1}$ ; MS (EI)  $m/z$  (%): 344 [ $\text{M}^+$ ] (8.0), 57 (100.0), 91 (63.4), 56 (49.5), 131 (43.6), 92 (39.7), 77 (29.8), 128 (29.3), 55 (27.4); HRMS (EI) Calcd. for  $\text{C}_{19}\text{H}_{14}\text{Cl}_2\text{O}_2$  ( $\text{M}^+$ ) requires 344.0371, Found: 344.0369.

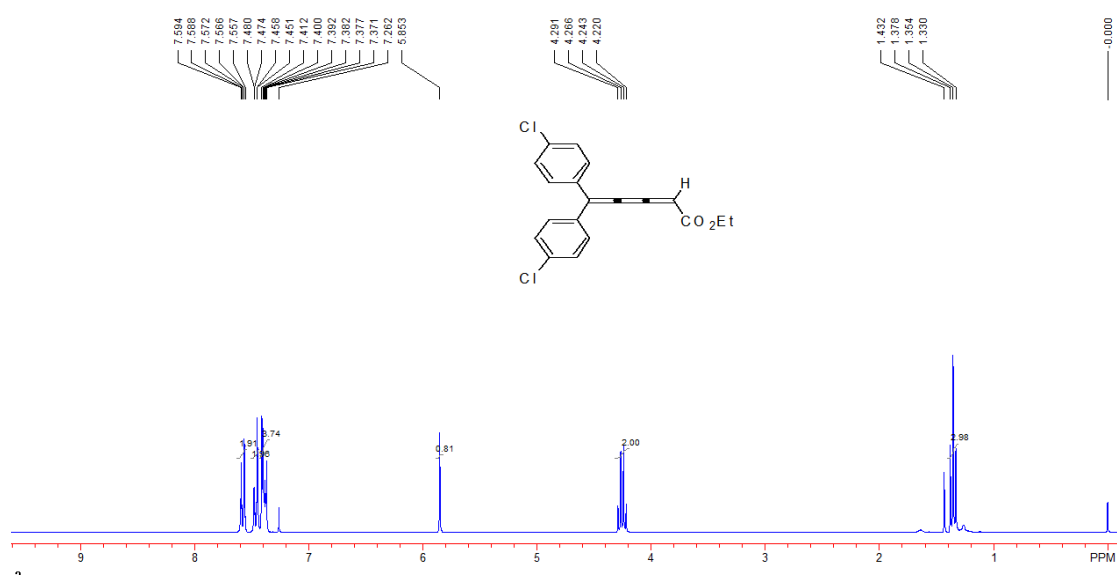

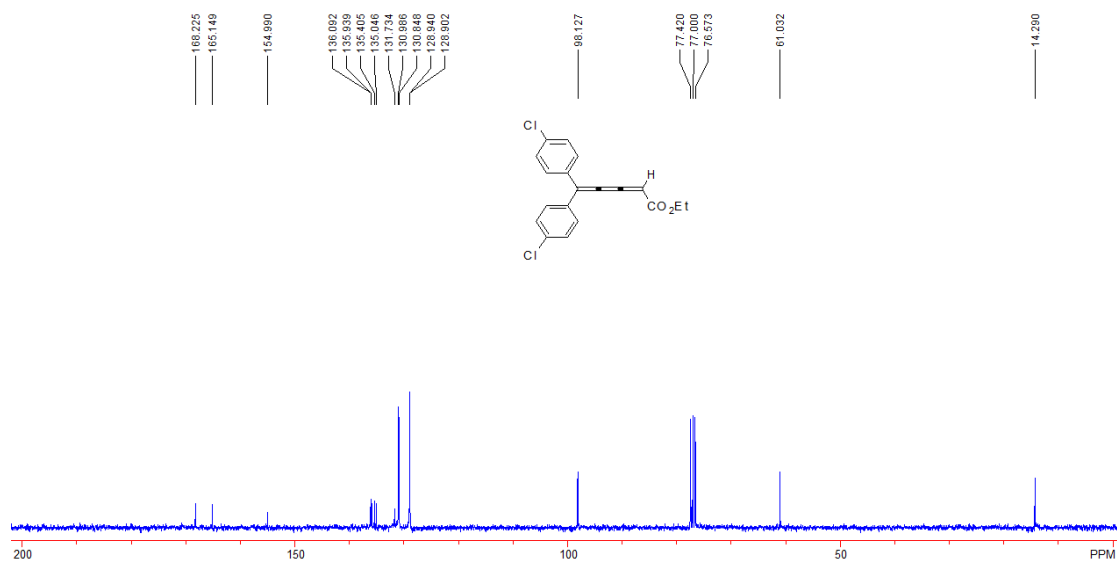

### General procedure for the cycloaddition of diarylvinylenecyclopropanes **1** with ethyl 5,5-diarylpenta-2,3,4-trienoate **2**.

**Procedure A:** Diarylvinylenecyclopropanes (VDCPs) **1** (0.18 mmol) and ethyl 5,5-diarylpenta-2,3,4-trienoate **2** (0.22 mmol, 1.2 equiv) were dissolved in CH<sub>2</sub>Cl<sub>2</sub> (3 mL), then Tf<sub>2</sub>NH (2 mg, 4 mol %) was added. The mixture was stirred for 4 to 5 days at room temperature (25 °C). The solvent was removed in vacuo, and the residue was purified by flash column chromatography on silica gel column with petroleum ether-EtOAc (50:1) as an eluent.

**Procedure B:** Diarylvinylenecyclopropanes (VDCPs) **1** (0.18 mmol) and ethyl 5,5-diarylpenta-2,3,4-trienoate **2** (0.22 mmol, 1.2 equiv) were dissolved in CH<sub>2</sub>Cl<sub>2</sub> (3 mL), and then Tf<sub>2</sub>NH (2 mg, 4 mol %) was added at 40 °C. The mixture was stirred for several hours at this temperature till the substrates were consumed. The solvent was removed in vacuo, and the residue was purified by flash column chromatography on silica gel column with petroleum ether-EtOAc (50:1) as an eluent.

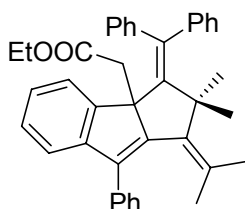

ethyl

### 2-(3-(diphenylmethylene)-2,2-dimethyl-8-phenyl-1-(propan-2-ylidene)-1,2,3,3a-tetrahydrocyclopenta[a]inden-3a-yl)acetate **3a**.

A white solid, Mp: 210-212 °C; <sup>1</sup>H NMR (CDCl<sub>3</sub>, 300 MHz, TMS) δ 0.75 (t, *J* = 6.9 Hz, 3H,

CH<sub>3</sub>), 1.22 (s, 3H, CH<sub>3</sub>), 1.32 (s, 3H, CH<sub>3</sub>), 1.62 (s, 3H, CH<sub>3</sub>), 1.87 (s, 3H, CH<sub>3</sub>), 3.22 (d, *J* = 13.5 Hz, 1H), 3.30 (d, *J* = 13.5 Hz, 1H), 3.61-3.76 (m, 2H, CH<sub>2</sub>), 5.80 (d, *J* = 7.8 Hz, 1H, Ar), 6.43-6.50 (m, 2H, Ar), 6.86-6.90 (m, 2H, Ar), 6.94-7.09 (m, 6H, Ar), 7.27-7.32 (m, 1H, Ar), 7.37-7.56 (m, 7H, Ar). <sup>13</sup>C NMR (CDCl<sub>3</sub>, 75 MHz, TMS) δ 13.7, 21.1, 25.0, 26.9, 29.3, 41.2, 43.0, 59.7, 64.8, 119.3, 123.9, 125.9, 126.0, 127.1, 127.2, 127.4, 127.8, 128.1, 128.5, 129.7, 130.1, 130.9, 131.2, 135.3, 136.8, 137.4, 141.2, 143.2, 144.3, 144.9, 145.3, 147.3, 159.9, 169.9. IR (CH<sub>2</sub>Cl<sub>2</sub>) ν 3057, 3021, 2976, 2931, 2903, 2867, 1950, 1630, 1597, 1491, 1462, 1442, 1386, 1366, 1310, 1266, 1169, 1114, 1094, 1031, 779, 761, 701, 608, 597 cm<sup>-1</sup>. MS (%) *m/e* 550 (M<sup>+</sup>, 100), 535 (17), 463 (85), 462 (43), 448 (26), 447 (53), 372 (19), 230 (15), 215 (14). Anal. calcd. for C<sub>40</sub>H<sub>38</sub>O<sub>2</sub>: C, 87.23%; H, 6.95%. Found: C, 86.91%; H, 7.00%.

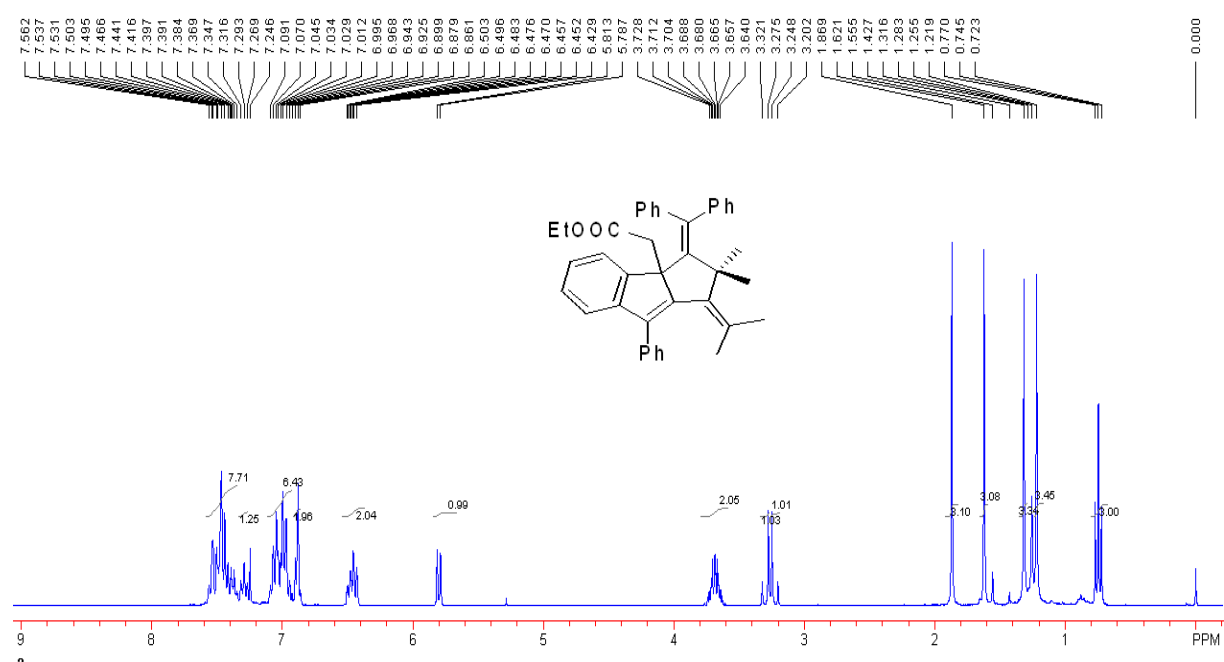

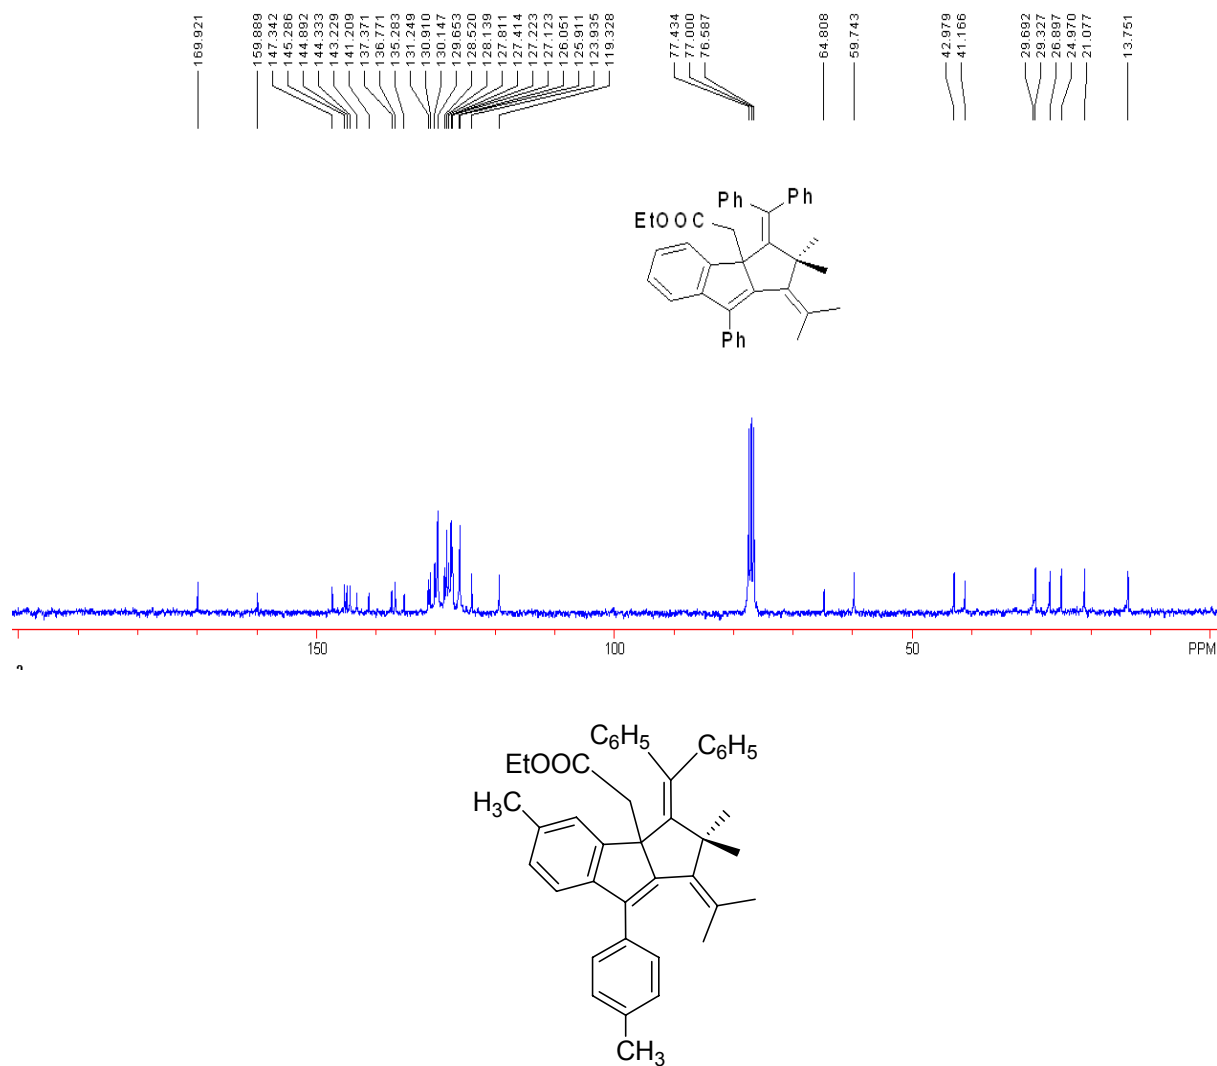

ethyl

**2-(3-(diphenylmethylene)-2,2,5-trimethyl-1-(propan-2-ylidene)-8-*p*-tolyl-1,2,3,3a-tetrahydrocyclopenta[*a*]inden-3a-yl)acetate 3b.**

A white solid, Mp: 150-152 °C; <sup>1</sup>H NMR (CDCl<sub>3</sub>, 300 MHz, TMS) δ 0.74 (t, *J* = 6.9 Hz, 3H, CH<sub>3</sub>), 1.22 (s, 3H, CH<sub>3</sub>), 1.30 (s, 3H, CH<sub>3</sub>), 1.63 (s, 3H, CH<sub>3</sub>), 1.86 (s, 3H, CH<sub>3</sub>), 2.21 (s, 3H, CH<sub>3</sub>), 2.40 (s, 3H, CH<sub>3</sub>), 3.21 (d, *J* = 13.8 Hz, 1H), 3.29 (d, *J* = 13.8 Hz, 1H), 3.62-3.74 (m, 2H, CH<sub>2</sub>), 5.81 (d, *J* = 7.5 Hz, 1H, Ar), 6.33 (dd, *J* = 7.5, 1.8 Hz, 1H, Ar), 6.48 (dt, *J* = 7.2, 1.8 Hz, 1H, Ar), 6.79 (d, *J* = 7.5 Hz, 1H, Ar), 6.86-6.93 (m, 6H, Ar), 7.29-7.49 (m, 7H, Ar). <sup>13</sup>C NMR (CDCl<sub>3</sub>, 75 MHz, TMS) δ 13.7, 21.06, 21.09, 21.3, 25.0, 26.9, 29.3, 41.2, 43.1, 59.7, 64.9, 119.2, 123.7, 125.9, 126.1, 127.2, 128.1, 128.2, 129.3, 129.5, 130.0, 130.7, 135.1, 135.6, 136.7, 136.9, 137.4, 140.4, 141.7, 142.2, 143.4, 145.5, 147.4, 160.1, 170.0. IR (CH<sub>2</sub>Cl<sub>2</sub>) ν 3021, 2975, 2927, 2866, 1731, 1597, 1508, 1492, 1461, 1443, 1366, 1306, 1266, 1213, 1166, 1114, 1094, 1036, 819, 747, 702, 549 cm<sup>-1</sup>. MS (%) *m/e* 578 (M<sup>+</sup>, 40), 491 (45), 475 (36), 461 (29), 386 (21), 305 (17), 238 (53), 230 (100), 215 (78), 105 (68). HRMS (EI) for C<sub>42</sub>H<sub>42</sub>O<sub>2</sub>:

578.3185; Found: 578.3188.

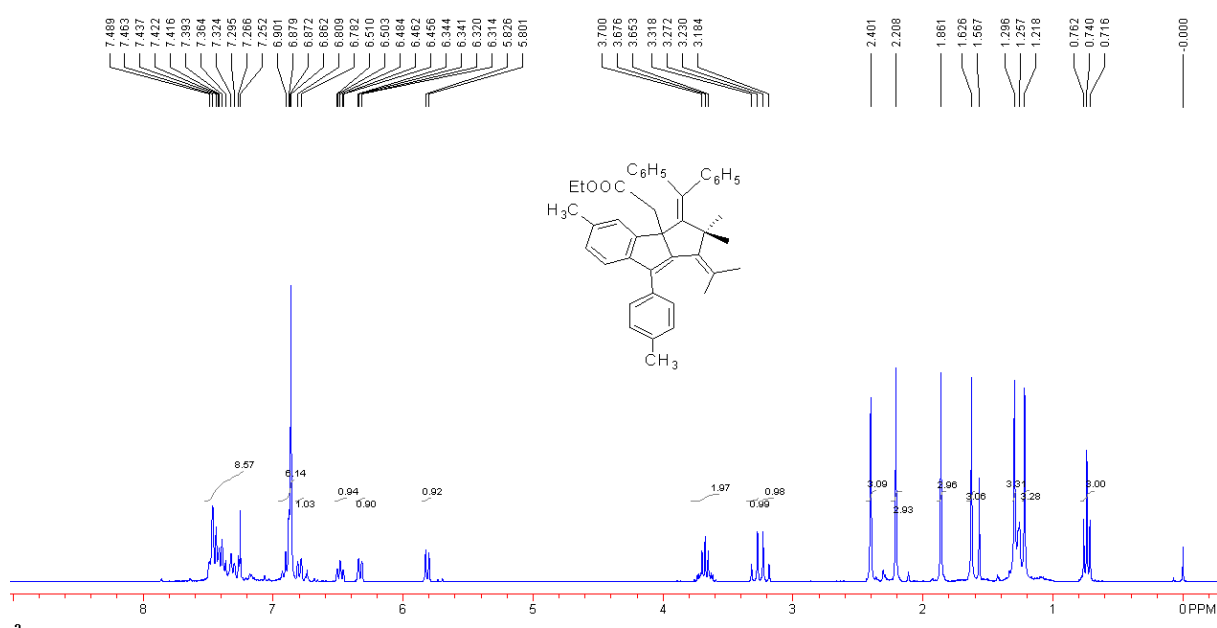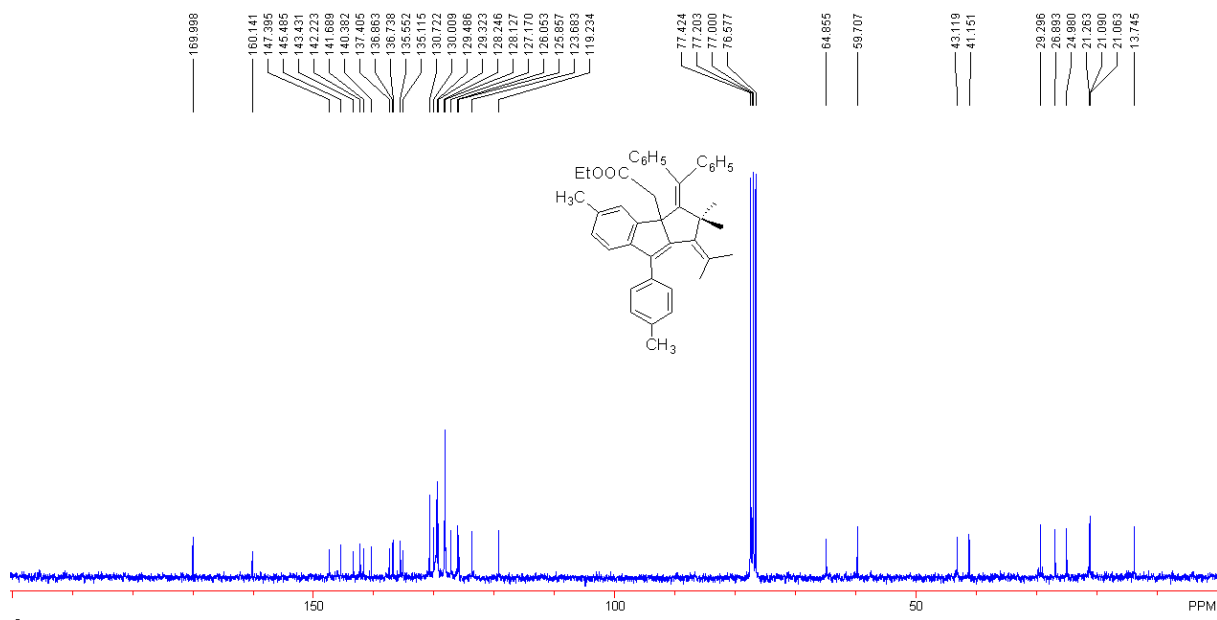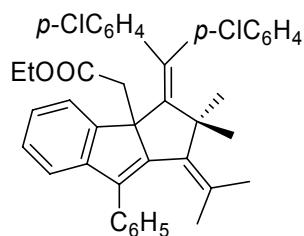

ethyl

**2-(3-(bis(4-chlorophenyl)methylene)-2,2-dimethyl-8-phenyl-1-(propan-2-ylidene)-1,2,3,3a-tetrahydrocyclopenta[a]inden-3a-yl)acetate 3c.**

A white solid, Mp: 150-152 °C; <sup>1</sup>H NMR (CDCl<sub>3</sub>, 400 MHz, TMS) δ 0.78 (t, *J* = 7.2 Hz, 3H,



CH<sub>3</sub>), 1.22 (s, 3H, CH<sub>3</sub>), 1.32 (s, 3H, CH<sub>3</sub>), 1.63 (s, 3H, CH<sub>3</sub>), 1.83 (s, 3H, CH<sub>3</sub>), 3.17 (d, *J* = 14.1 Hz, 1H), 3.26 (d, *J* = 14.1 Hz, 1H), 3.65-3.75 (m, 2H, CH<sub>2</sub>), 5.67 (d, *J* = 2.8 Hz, 1H, Ar), 6.45 (d, *J* = 7.8 Hz, 1H, Ar), 6.74 (d, *J* = 7.8 Hz, 1H, Ar), 6.90 (dd, *J* = 2.4 Hz, *J* = 8.1 Hz, 1H, Ar), 6.98-7.09 (m, 6H, Ar), 7.37-7.45 (m, 5H, Ar), 7.49-7.59 (m, 2H, Ar). <sup>13</sup>C NMR (CDCl<sub>3</sub>, 100 MHz, TMS) δ 13.7, 21.1, 26.9, 29.2, 31.6, 41.2, 42.6, 59.8, 64.8, 119.8, 126.3, 126.6, 127.5, 128.0, 128.1, 128.5, 128.6, 129.5, 129.9, 130.1, 130.9, 131.9, 133.3, 133.4, 134.7, 137.9, 140.2, 143.4, 144.4, 144.7, 144.8, 145.4, 161.4, 169.5. IR (CH<sub>2</sub>Cl<sub>2</sub>) ν 3078, 3057, 3018, 2976, 2931, 2904, 2855, 1731, 1637, 1595, 1570, 1489, 1458, 1442, 1412, 1397, 1366, 1309, 1277, 1260, 1198, 1164, 1120, 1090, 1059, 1031, 1016, 987, 912, 850, 824, 763, 763, 742, 699, 677, 650, 631, 593 cm<sup>-1</sup>. MS (%) *m/e* 618 (M<sup>+</sup>, 28), 531 (38), 277 (38), 263 (72), 233 (46), 207 (61), 167 (90), 91 (100). HRMS (EI) for C<sub>40</sub>H<sub>36</sub>O<sub>2</sub>Cl<sub>2</sub>: 618.2092; Found: 618.2091.

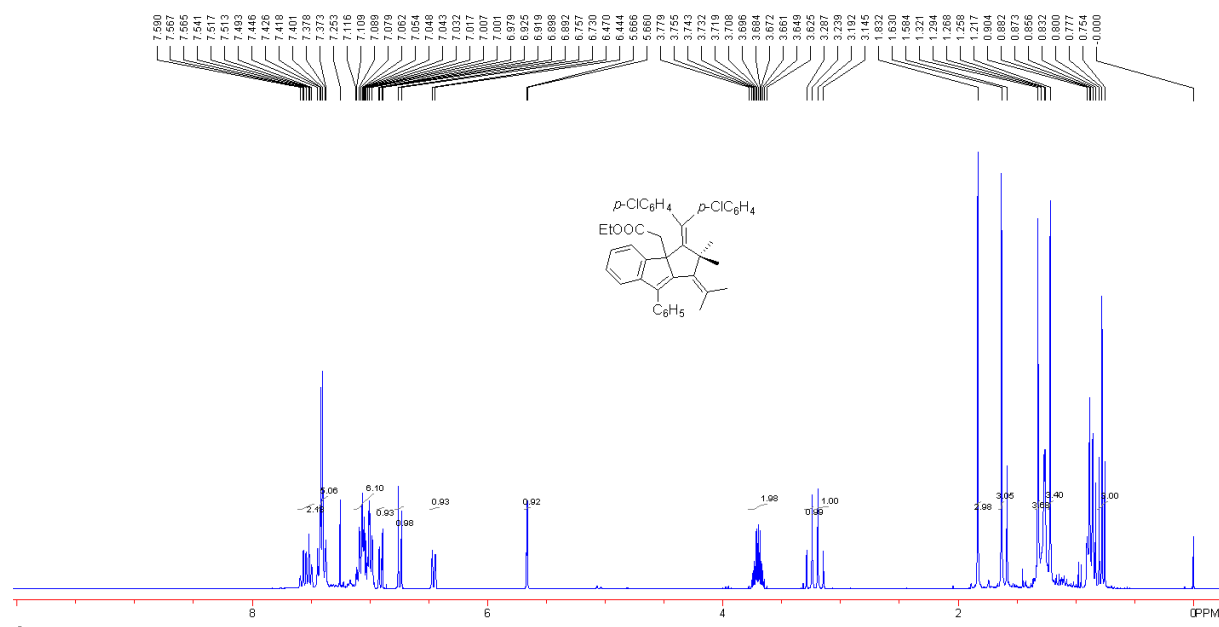

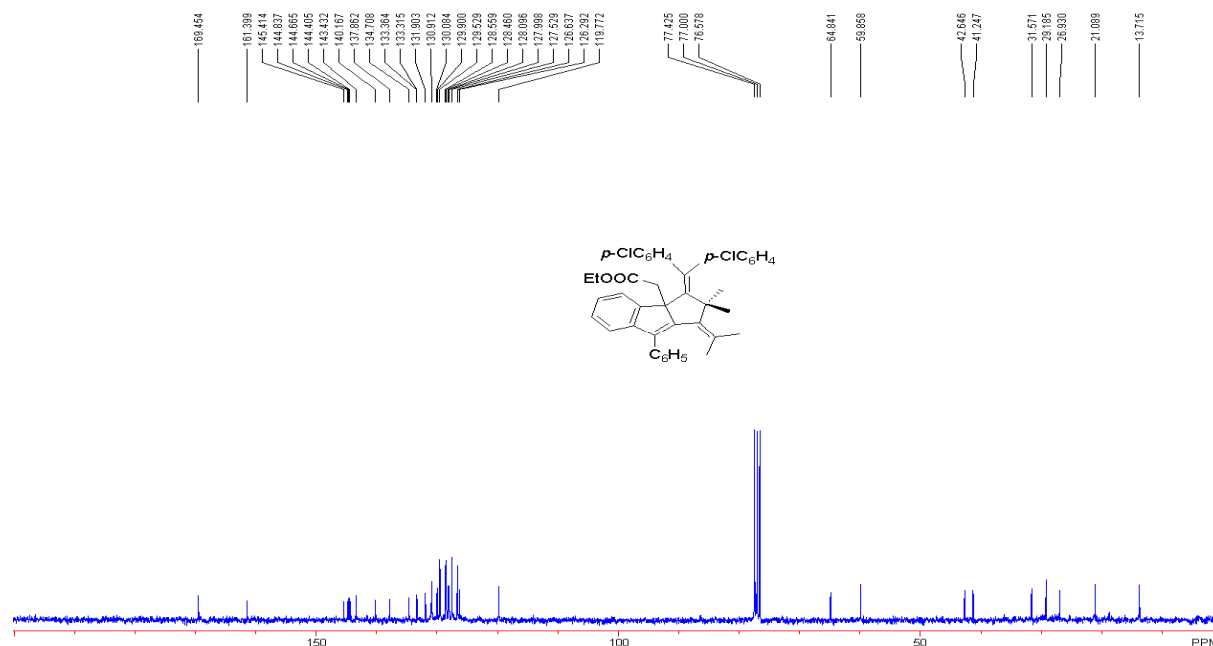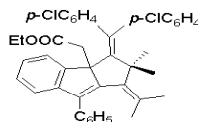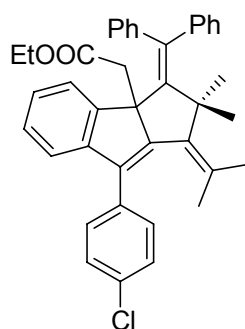

ethyl

**2-(8-(4-chlorophenyl)-2,2-dimethyl-1,3-di(propan-2-ylidene)-1,2,3,3a-tetrahydrocyclopenta[a]inden-3a-yl)acetate 3f.**

A light yellow oil.  $^1\text{H}$  NMR ( $\text{CDCl}_3$ , 300 MHz, TMS)  $\delta$  0.75 (t,  $J = 7.2$  Hz, 3H,  $\text{CH}_3$ ), 1.26 (s, 3H,  $\text{CH}_3$ ), 1.29 (s, 3H,  $\text{CH}_3$ ), 1.65 (s, 3H,  $\text{CH}_3$ ), 1.87 (s, 3H,  $\text{CH}_3$ ), 3.21 (d,  $J = 13.8$  Hz, 1H), 3.28 (d,  $J = 13.8$  Hz, 1H), 3.61-3.74 (m, 2H,  $\text{CH}_2$ ), 5.79 (d,  $J = 7.5$  Hz, 1H, Ar), 6.41 (d,  $J = 7.5$  Hz, 1H, Ar), 6.45-6.50 (m, 1H, Ar), 6.88-6.90 (m, 4H, Ar), 6.93-7.02 (m, 3H, Ar), 7.13-7.17 (m, 1H, Ar), 7.28-7.33 (m, 2H, Ar), 7.37-7.40 (m, 1H, Ar), 7.44-7.47 (m, 3H, Ar), 7.50-7.52 (m, 2H, Ar).  $^{13}\text{C}$  NMR ( $\text{CDCl}_3$ , 75 MHz, TMS)  $\delta$  13.7, 21.1, 25.0, 26.9, 29.3, 41.2, 42.9, 59.8, 64.8, 119.4, 124.0, 125.9, 126.0, 127.3, 127.4, 127.7, 128.0, 128.2, 128.7, 129.6, 130.1, 130.8, 130.9, 131.6, 131.8, 135.5, 136.1, 136.6, 142.0, 143.1, 143.4, 143.9, 145.3, 147.3, 159.6, 169.8. IR ( $\text{CH}_2\text{Cl}_2$ )  $\nu$  3058, 2970, 2929, 2871, 1730, 1596, 1489, 1461, 1443, 1394, 1367, 1304, 1264, 1214, 1166, 1118, 1090, 1071, 1035, 1014, 825, 749, 703, 681  $\text{cm}^{-1}$ . MS (%)  $m/e$  584 ( $\text{M}^+$ , 15), 497 (15), 341 (21), 252 (41), 133 (51), 105 (86), 71 (90), 57 (100).

HRMS (EI) for  $C_{40}H_{37}O_2Cl$ : 584.2482; Found: 584.2490.

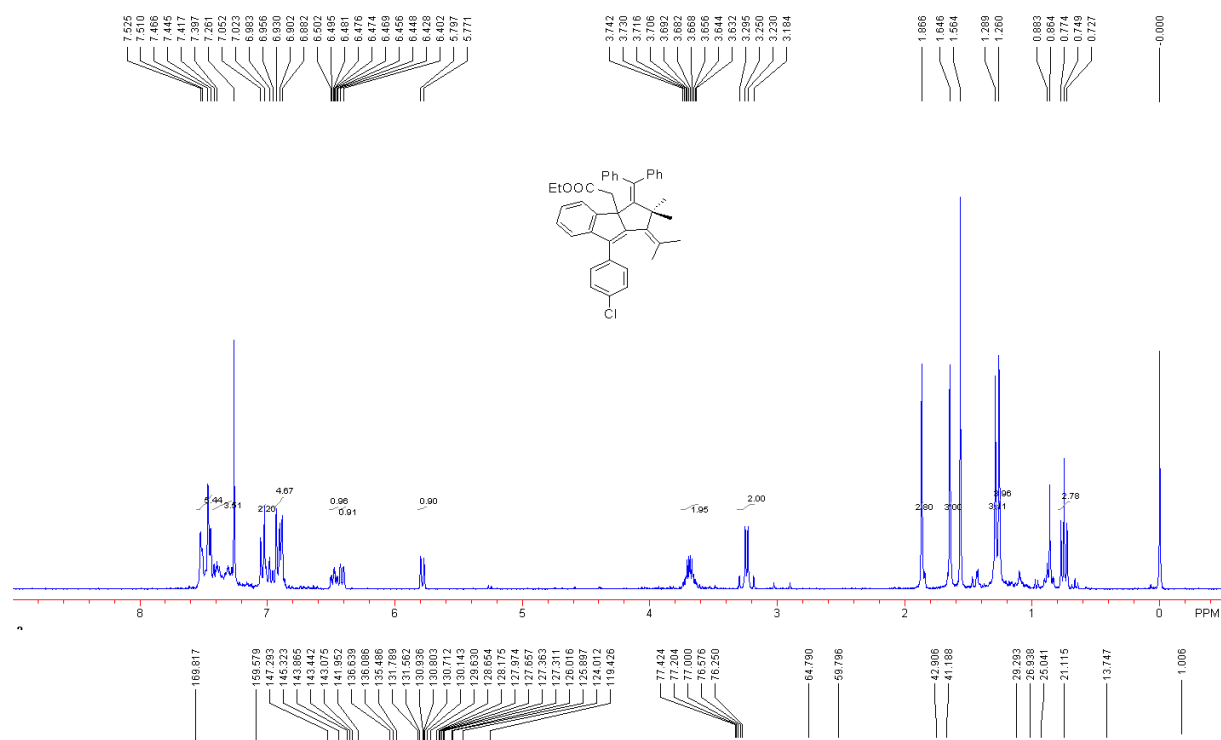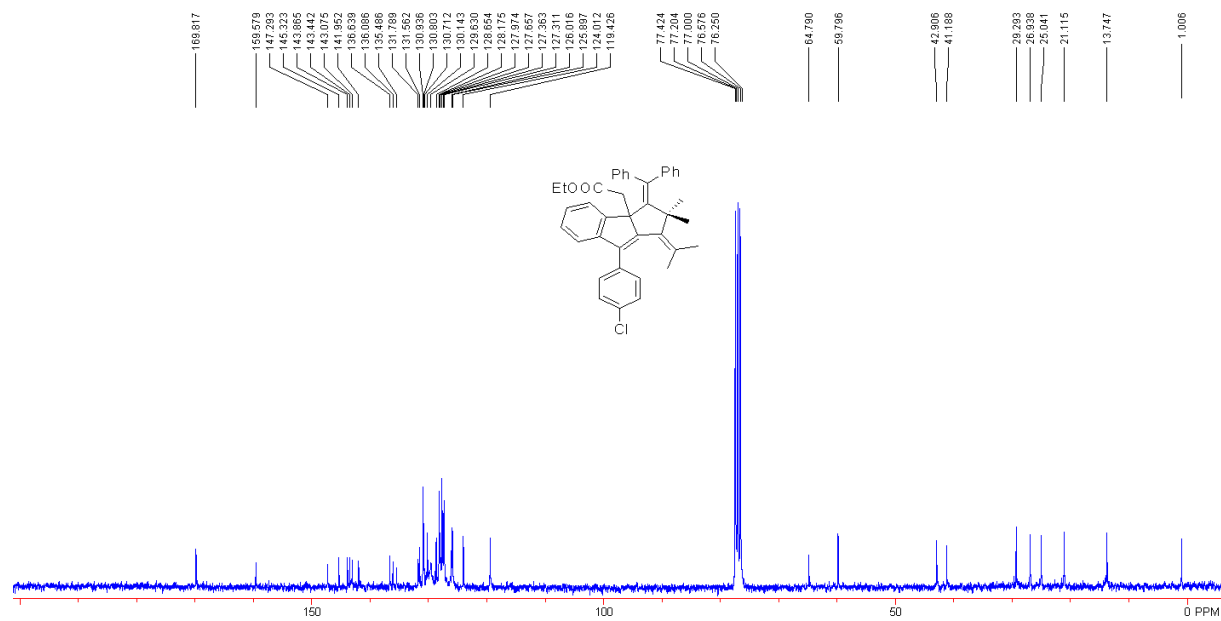

ethyl

2-(8-(3,4-dichlorophenyl)-2,2-dimethyl-1,3-di(propan-2-ylidene)-1,2,3,3a-tetrahydrocyclo

**penta[a]inden-3a-yl)acetate 3g.**

A white solid, Mp: 95-97 °C; <sup>1</sup>H NMR (CDCl<sub>3</sub>, 400 MHz, TMS) δ 0.76 (t, *J* = 7.2 Hz, 3H, CH<sub>3</sub>), 1.31 (s, 3H, CH<sub>3</sub>), 1.31 (s, 3H, CH<sub>3</sub>), 1.67 (s, 3H, CH<sub>3</sub>), 1.88 (s, 3H, CH<sub>3</sub>), 3.20 (d, *J* = 13.6 Hz, 1H), 3.24 (d, *J* = 13.6 Hz, 1H), 3.63-3.76 (m, 2H, CH<sub>2</sub>), 5.79 (d, *J* = 7.6 Hz, 1H, Ar), 6.40 (dd, *J* = 7.6, 1.2 Hz, 1H, Ar), 6.47 (dt, *J* = 6.4, 2.0 Hz, 1H, Ar), 6.80 (dd, *J* = 2.0 Hz, *J* = 8.1 Hz, 1H, Ar), 6.87-6.91 (m, 1H, Ar), 6.99 (t, *J* = 7.8 Hz, 1H, Ar), 7.12-7.15 (m, 2H, Ar), 7.29-7.40 (m, 3H, Ar), 7.43-7.49 (m, 4H, Ar), 7.51 (d, *J* = 4.8 Hz, 2H, Ar). <sup>13</sup>C NMR (CDCl<sub>3</sub>, 100 MHz, TMS) δ 13.7, 21.1, 25.1, 26.9, 29.3, 41.2, 42.8, 59.8, 64.8, 119.5, 124.1, 125.8, 126.1, 127.4, 127.6, 128.1, 128.2, 128.8, 128.9, 129.4, 129.8, 130.2, 130.7, 131.3, 131.4, 132.1, 134.9, 135.7, 136.5, 142.9, 143.1, 143.2, 144.9, 145.3, 147.2, 159.3, 169.7. IR (CH<sub>2</sub>Cl<sub>2</sub>) ν 3059, 2976, 2932, 1730, 1598, 1504, 1464, 1443, 1366, 1308, 1265, 1222, 1156, 1093, 1034, 1015, 836, 778, 703, 599, 531 cm<sup>-1</sup>. MS (%) *m/e* 618 (M<sup>+</sup>, 100), 532 (50), 531 (79), 515 (41), 341 (29), 230 (79), 215 (73), 91 (33). HRMS (EI) for C<sub>40</sub>H<sub>36</sub>O<sub>2</sub>Cl<sub>2</sub>: 618.2092; Found: 618.2086.

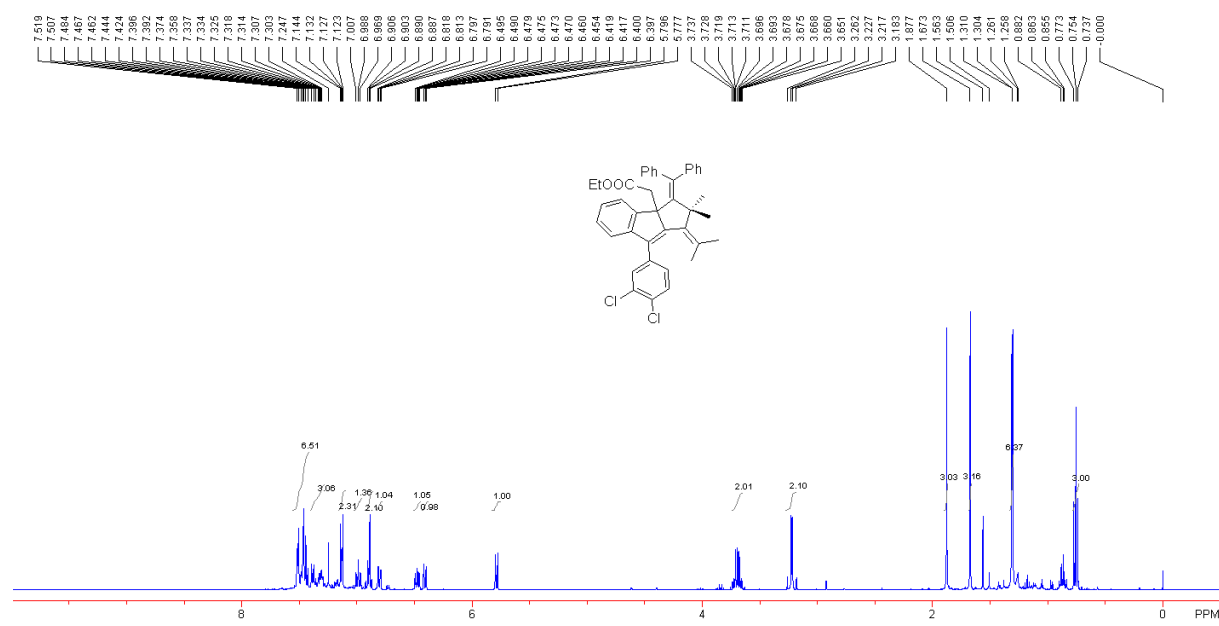

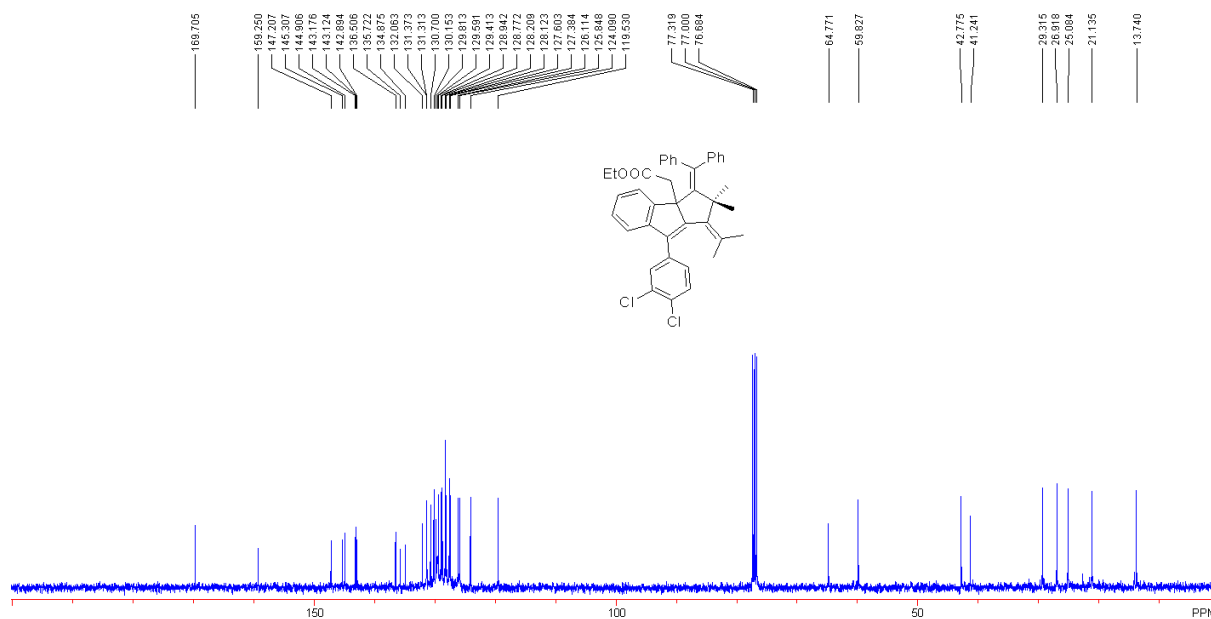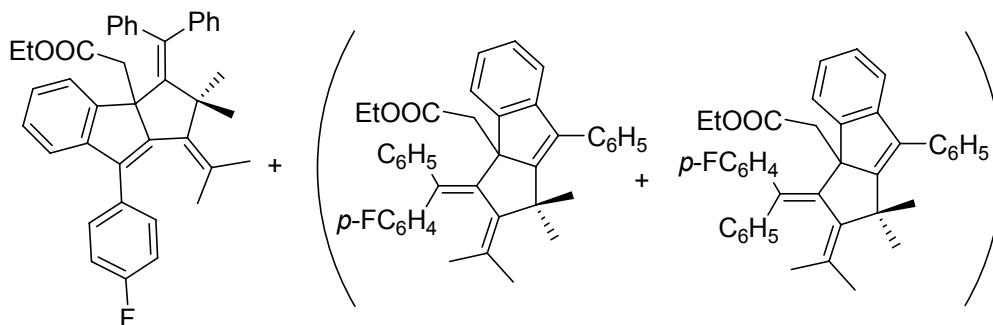

The ratio of **3h** : **4h** = 9 : 1

ethyl

**2-(3-(diphenylmethylene)-8-(4-fluorophenyl)-2,2-dimethyl-1-(propan-2-ylidene)-1,2,3,3a-tetrahydrocyclopenta[a]inden-3a-yl)acetate** **3h** and ethyl **2-(3-((4-fluorophenyl)(phenyl)methylene)-1,1-dimethyl-8-phenyl-2-(propan-2-ylidene)-1,2,3,3a-tetrahydrocyclopenta[a]inden-3a-yl)acetate** **4h**

A white solid, Mp: 90-92 °C; <sup>1</sup>H NMR (CDCl<sub>3</sub>, 300 MHz, TMS) δ 0.74 (t, *J* = 6.9 Hz, 3H, CH<sub>3</sub>), 1.25 (s, 3H, CH<sub>3</sub>), 1.30 (s, 3H, CH<sub>3</sub>), 1.64 (m, 3H, CH<sub>3</sub>), 1.87 (s, 3H, CH<sub>3</sub>), 3.17-3.31 (m, 2H, CH<sub>2</sub>), 3.63-3.74 (m, 2H, CH<sub>2</sub>), 5.79 (d, *J* = 7.8 Hz, 1H, Ar), 5.93 (d, *J* = 7.8 Hz, 0.1H, Ar), 6.42-6.50 (m, 2H, Ar), 6.76 (t, *J* = 8.7 Hz, 2H, Ar), 6.88-7.01 (m, 6H, Ar), 7.14-7.20 (m, 1H, Ar), 7.30-7.53 (m, 6H, Ar). <sup>13</sup>C NMR (CDCl<sub>3</sub>, 75 MHz, TMS) δ 13.7, 21.0, 25.0, 26.9, 29.3, 41.2, 42.9, 59.7, 64.8, 114.3 (d, *J*<sub>C-F</sub> = 21.3 Hz), 119.4, 124.0, 125.9 (d, *J*<sub>C-F</sub> = 6.8 Hz), 127.3, 128.2, 128.6, 128.8, 129.5, 129.9, 130.1, 130.3, 130.8, 131.1, 131.2 (d, *J*<sub>C-F</sub> = 2.6 Hz), 135.4, 136.2, 136.7, 140.9, 141.4, 143.1, 144.1, 145.3, 147.3, 159.7, 161.1 (d, *J*<sub>C-F</sub> = 244.1 Hz), 169.8. <sup>19</sup>F NMR (CDCl<sub>3</sub>, 282 MHz, CFCl<sub>3</sub>) δ -123.1, -121.7, -121.1. IR (CH<sub>2</sub>Cl<sub>2</sub>) ν 3056,

2973, 2931, 1730, 1598, 1581, 1505, 1490, 1443, 1391, 1367, 1306, 1268, 1223, 1188, 1157, 1117, 1090, 1035, 920, 866, 839, 779, 750, 702, 613  $\text{cm}^{-1}$ . MS (%)  $m/e$  568 ( $M^+$ , 36), 481 (42), 451 (57), 341 (40), 229 (100), 215 (67), 165 (17), 91 (19). HRMS (EI) for  $\text{C}_{40}\text{H}_{37}\text{O}_2\text{F}$ : 568.2778; Found: 568.2790.

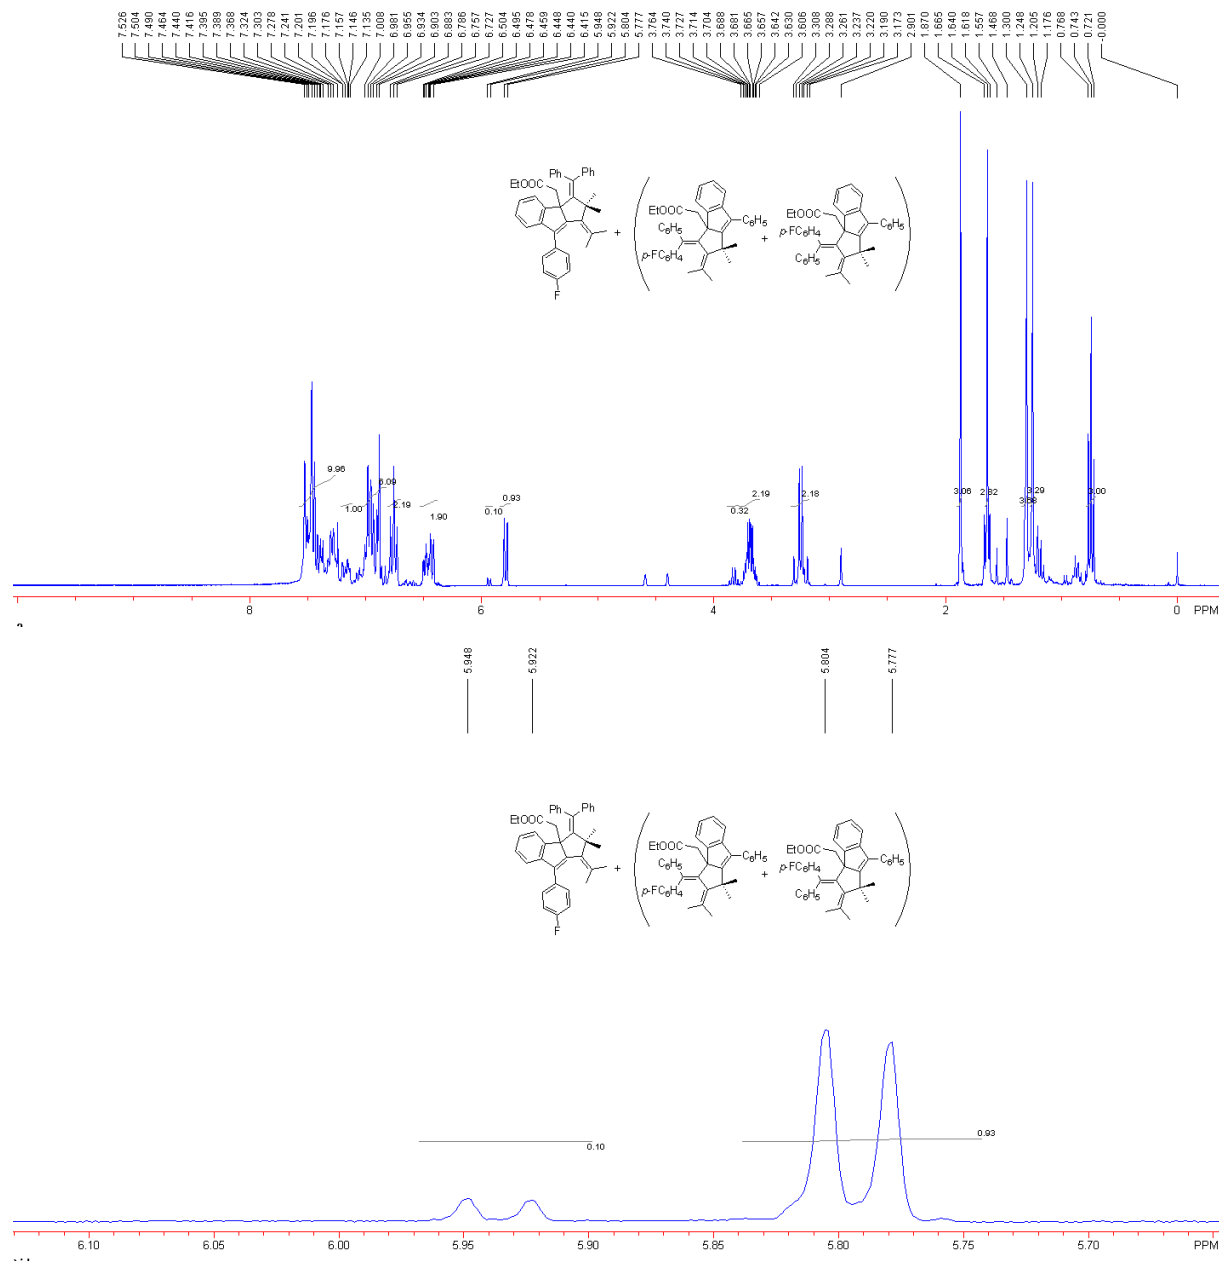

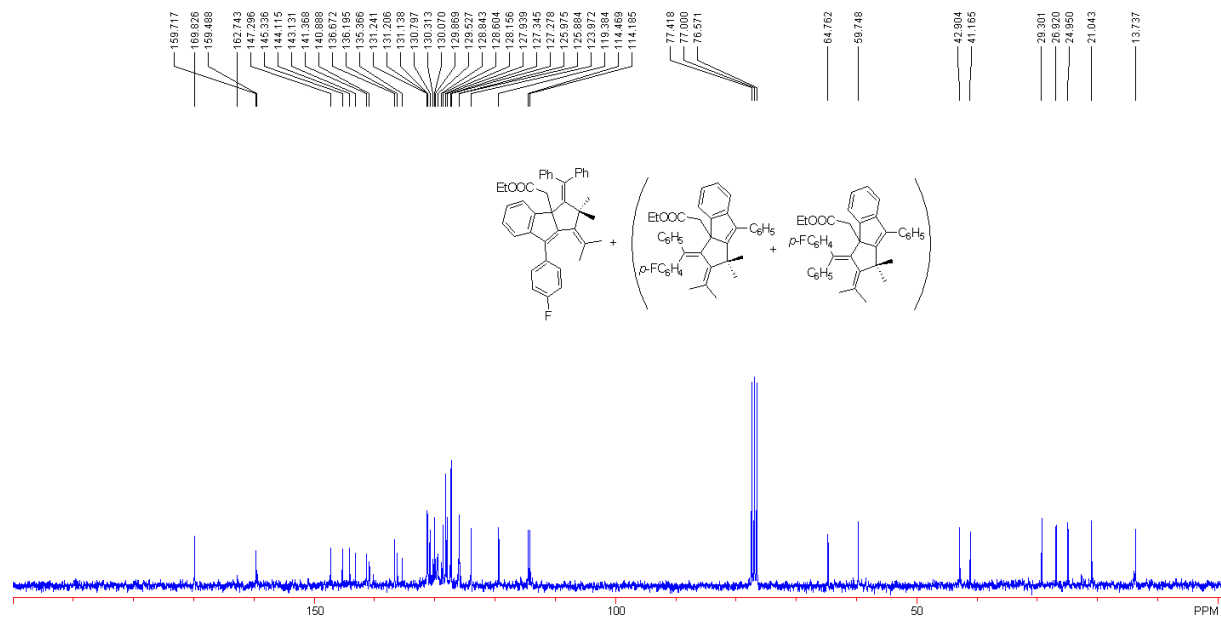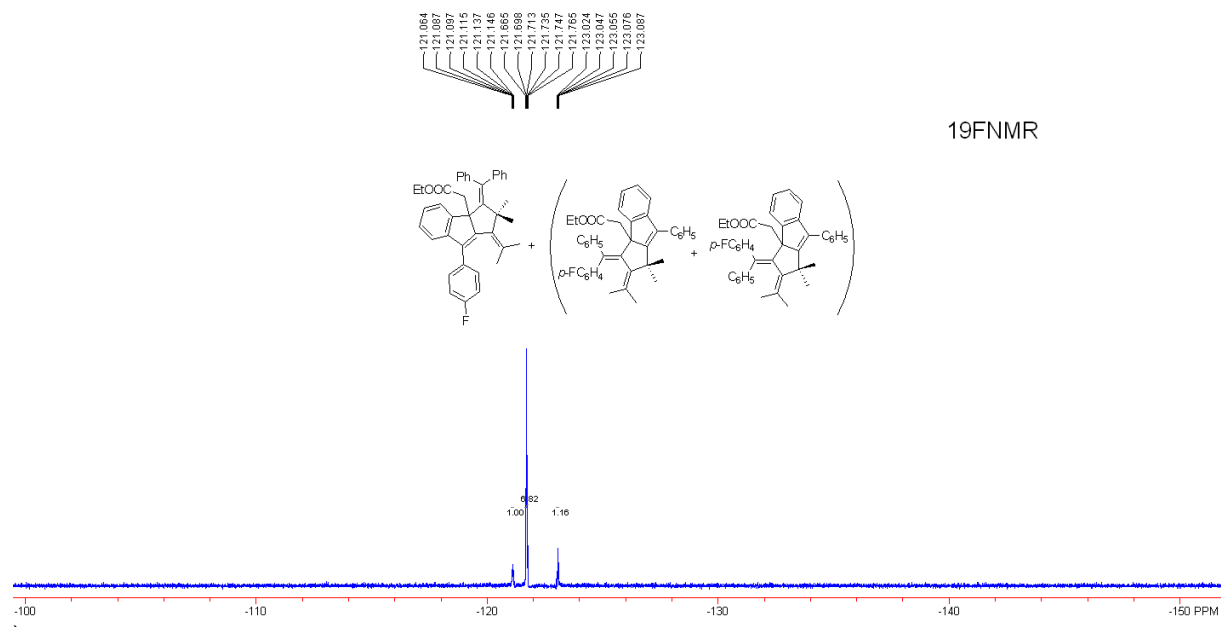

<sup>19</sup>F NMR

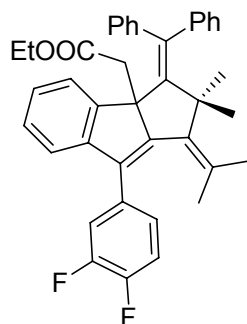

ethyl

**2-(8-(3,4-difluorophenyl)-2,2-dimethyl-1,3-di(propan-2-ylidene)-1,2,3,3a-tetrahydrocyclopenta[a]inden-3a-yl)acetate 3i.**

A white solid, Mp: 100-102 °C; <sup>1</sup>H NMR (CDCl<sub>3</sub>, 300 MHz, TMS) δ 0.75 (t, *J* = 7.2 Hz, 3H, CH<sub>3</sub>), 1.29 (s, 3H, CH<sub>3</sub>), 1.30 (s, 3H, CH<sub>3</sub>), 1.67 (s, 3H, CH<sub>3</sub>), 1.88 (s, 3H, CH<sub>3</sub>), 3.20 (d, *J* = 13.8 Hz, 1H), 3.26 (d, *J* = 13.8 Hz, 1H), 3.64-3.75 (m, 2H, CH<sub>2</sub>), 5.78 (d, *J* = 7.5 Hz, 1H, Ar), 6.41 (d, *J* = 7.6 Hz, 1H, Ar), 6.45-6.51 (m, 1H, Ar), 6.69-6.72 (m, 1H, Ar), 6.79-6.91 (m, 4H, Ar), 6.99 (t, *J* = 7.5 Hz, 1H, Ar), 7.31-7.42 (m, 3H, Ar), 7.44-7.47 (m, 3H, Ar), 7.52 (d, *J* = 4.5 Hz, 2H, Ar). <sup>13</sup>C NMR (CDCl<sub>3</sub>, 75 MHz, TMS) δ 13.7, 21.1, 25.0, 26.9, 29.3, 41.2, 42.8, 59.8, 64.8, 116.1 (d, *J*<sub>C-F</sub> = 16.3 Hz), 118.3 (d, *J*<sub>C-F</sub> = 16.3 Hz), 119.5, 124.1, 125.7 (dd, *J*<sub>C-F</sub> = 3.0 Hz, *J*<sub>C-F</sub> = 3.5 Hz), 125.9, 126.1, 127.5 (d, *J*<sub>C-F</sub> = 11.9 Hz), 128.1, 128.2, 128.7, 129.6, 130.1, 130.7, 131.8, 135.2, 135.6, 136.5, 141.8 (dd, *J*<sub>C-F</sub> = 4.5 Hz, *J*<sub>C-F</sub> = 4.7 Hz), 142.5, 143.2 (d, *J*<sub>C-F</sub> = 40.0 Hz), 145.2, 147.2, 148.6 (dd, *J*<sub>C-F</sub> = 12.6 Hz, *J*<sub>C-F</sub> = 246.7 Hz), 149.5 (dd, *J*<sub>C-F</sub> = 12.6 Hz, *J*<sub>C-F</sub> = 244.9 Hz), 159.4, 169.8. <sup>19</sup>F NMR (CDCl<sub>3</sub>, 282 MHz, CFCl<sub>3</sub>) δ -144.6, -146.2. IR (CH<sub>2</sub>Cl<sub>2</sub>) ν 3058, 2976, 2928, 2855, 2360, 2342, 1731, 1599, 1511, 1492, 1459, 1443, 1367, 1299, 1267, 1204, 1171, 1113, 1094, 1072, 1034, 880, 821, 749, 702, 669, 598 cm<sup>-1</sup>. MS (%) *m/e* 586 (M<sup>+</sup>, 40), 499 (35), 483 (36), 341 (31), 242 (52), 230 (100), 215 (90), 203 (83). HRMS (EI) for C<sub>40</sub>H<sub>36</sub>O<sub>2</sub>F<sub>2</sub>Na: 609.2558; Found: 609.2576.

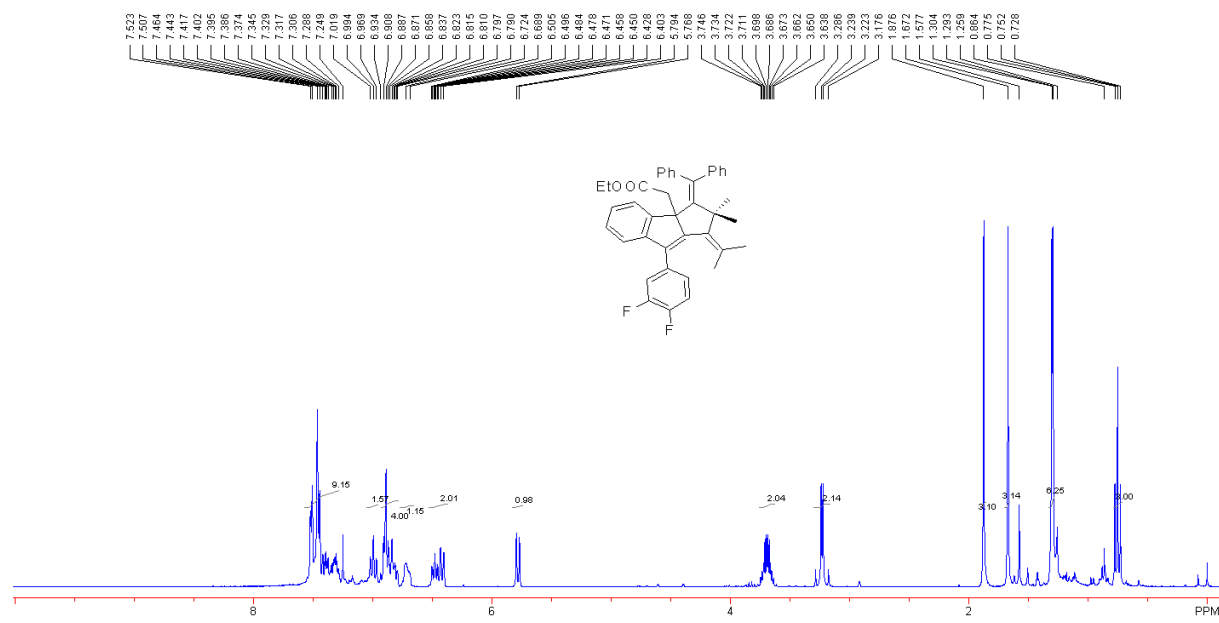



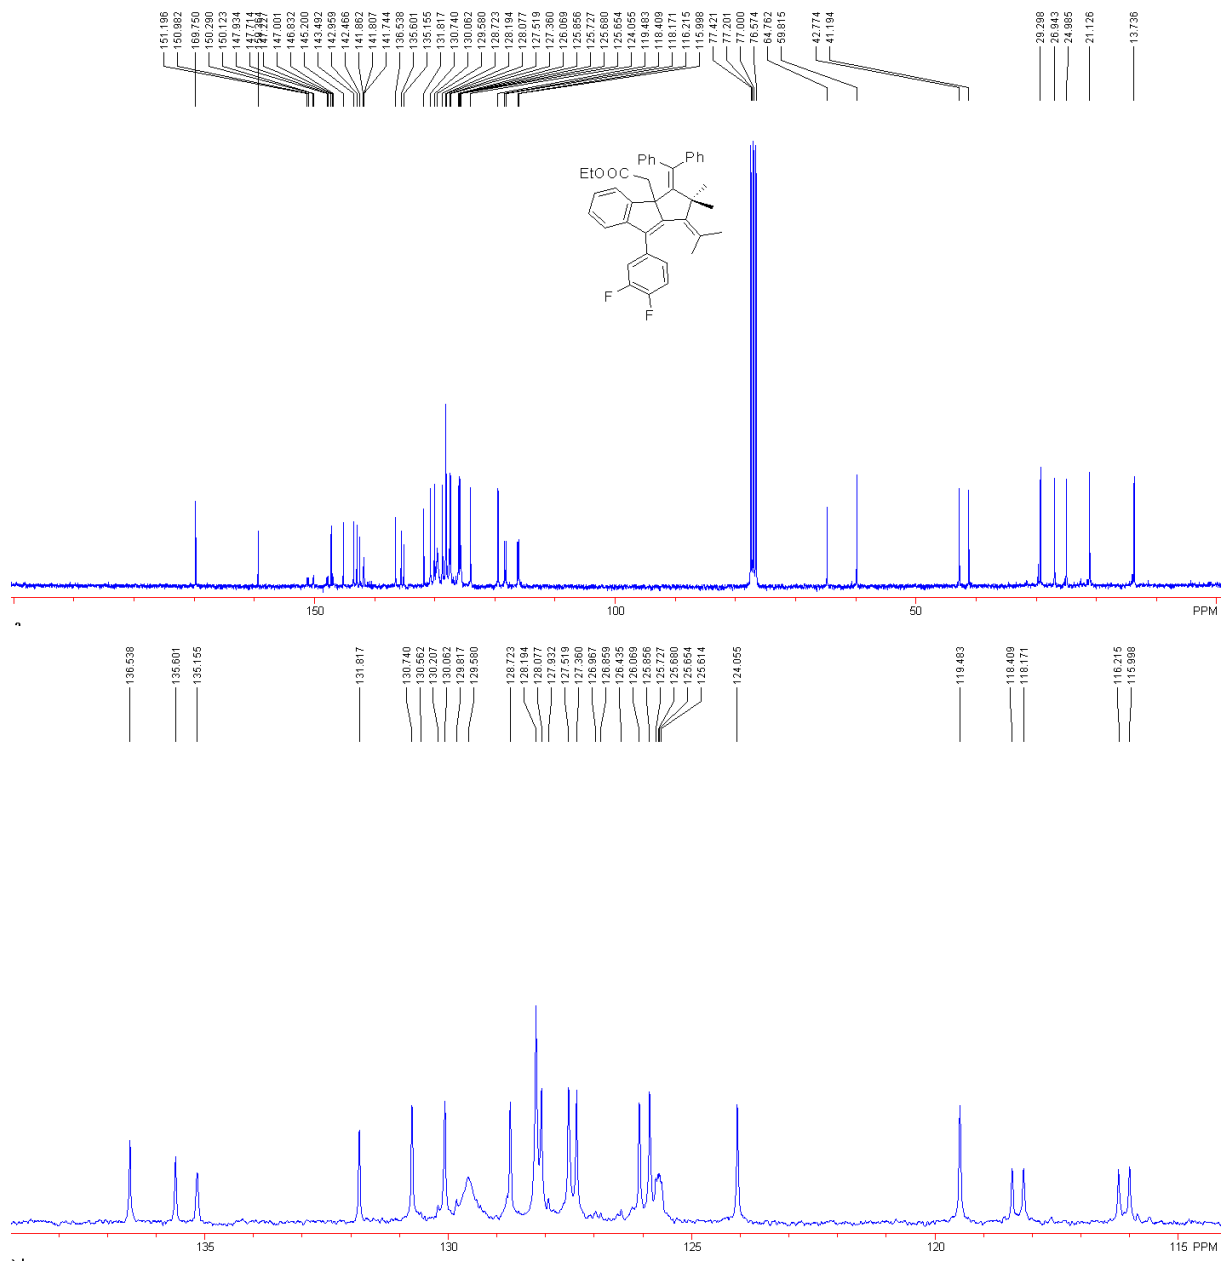

151.196  
150.982  
149.750  
150.290  
150.123  
147.934  
147.577  
147.577  
147.001  
146.832  
145.200  
143.492  
142.959  
141.982  
141.807  
141.744  
136.538  
135.601  
135.195  
135.195  
130.740  
130.740  
130.062  
128.817  
128.590  
128.723  
128.194  
128.077  
127.960  
127.960  
126.069  
125.856  
125.727  
125.680  
125.654  
125.654  
119.483  
119.483  
118.409  
118.171  
116.215  
115.998  
77.421  
77.000  
77.000  
76.574  
64.762  
59.815  
42.774  
41.194

29.298  
26.943  
24.985  
21.126  
13.736

136.538  
135.601  
135.155  
131.817  
130.740  
130.562  
130.207  
130.062  
128.817  
128.590  
128.723  
128.194  
128.077  
127.960  
127.519  
127.390  
126.967  
126.859  
126.435  
126.069  
125.856  
125.727  
125.680  
125.654  
125.614  
124.055  
119.483  
118.409  
118.171  
116.215  
115.998

135  
130  
125  
120  
115 PPM

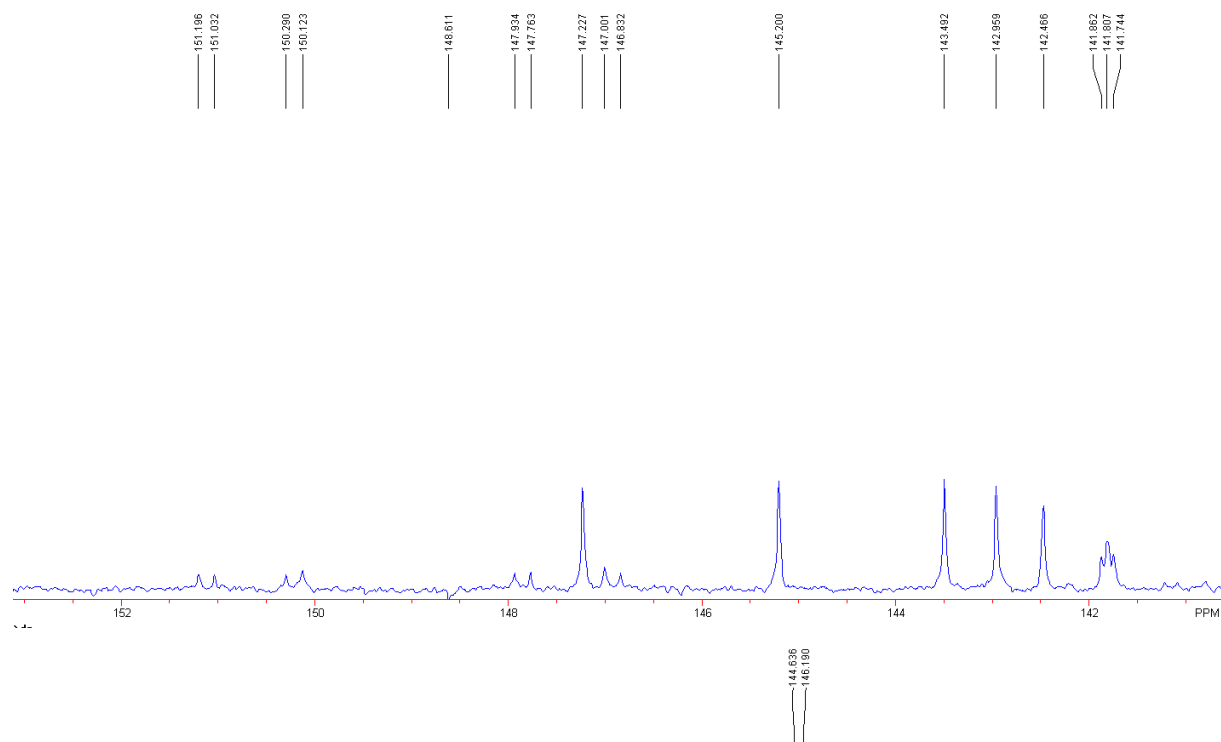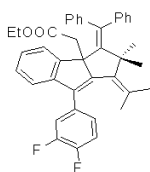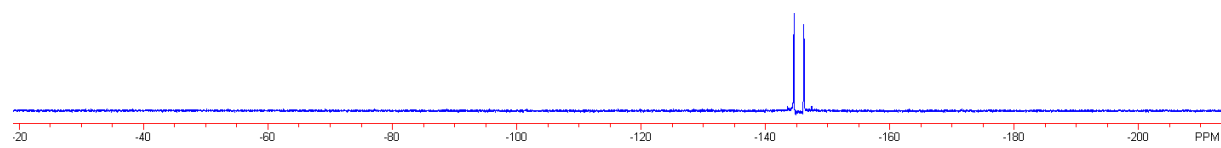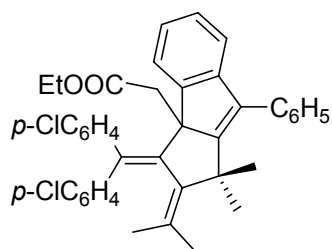

ethyl

**2-(3-(bis(4-chlorophenyl)methylene)-1,1-dimethyl-8-phenyl-2-(propan-2-ylidene)-1,2,3,3-a-tetrahydrocyclopenta[a]inden-3a-yl)acetate 4c.**

A white solid, Mp: 152-154 °C; <sup>1</sup>H NMR (CDCl<sub>3</sub>, 300 MHz, TMS) δ 0.77 (t, *J* = 6.9 Hz, 3H, CH<sub>3</sub>), 1.24 (s, 3H, CH<sub>3</sub>), 1.29 (s, 3H, CH<sub>3</sub>), 1.64 (s, 3H, CH<sub>3</sub>), 1.87 (s, 3H, CH<sub>3</sub>), 3.17 (d, *J* =

13.8 Hz, 1H), 3.23 (d,  $J = 13.8$  Hz, 1H), 3.66-3.77 (m, 2H, CH<sub>2</sub>), 5.94 (d,  $J = 7.8$  Hz, 1H, Ar), 6.31 (d,  $J = 8.7$  Hz, 1H, Ar), 6.62 (dt,  $J = 7.5, 1.8$  Hz, 1H, Ar), 6.90-6.94 (m, 5H, Ar), 7.05 (d,  $J = 8.7$  Hz, 2H, Ar), 7.37-7.49 (m, 7H, Ar). <sup>13</sup>C NMR (CDCl<sub>3</sub>, 75 MHz, TMS)  $\delta$  13.8, 21.0, 25.0, 26.9, 29.3, 41.2, 42.6, 59.9, 64.7, 119.6, 124.0, 125.7, 126.3, 127.4, 127.8, 127.9, 128.2, 128.8, 129.6, 130.8, 131.2, 131.8, 132.0, 133.3, 134.3, 135.5, 136.4, 142.2, 142.7, 142.8, 145.0, 147.2, 159.3, 169.7. IR (CH<sub>2</sub>Cl<sub>2</sub>)  $\nu$  2974, 2930, 1731, 1488, 1463, 1442, 1396, 1366, 1310, 1264, 1215, 1167, 1115, 1091, 1034, 1015, 826, 803, 778, 750, 702, 690 cm<sup>-1</sup>. MS (%)  $m/e$  618 (M<sup>+</sup>, 16), 531 (15), 406 (11), 339 (11), 229 (66), 215 (75), 202 (27), 141 (30), 84 (100). HRMS (EI) for C<sub>40</sub>H<sub>36</sub>O<sub>2</sub>Cl<sub>2</sub>: 618.2092; Found: 618.2086.

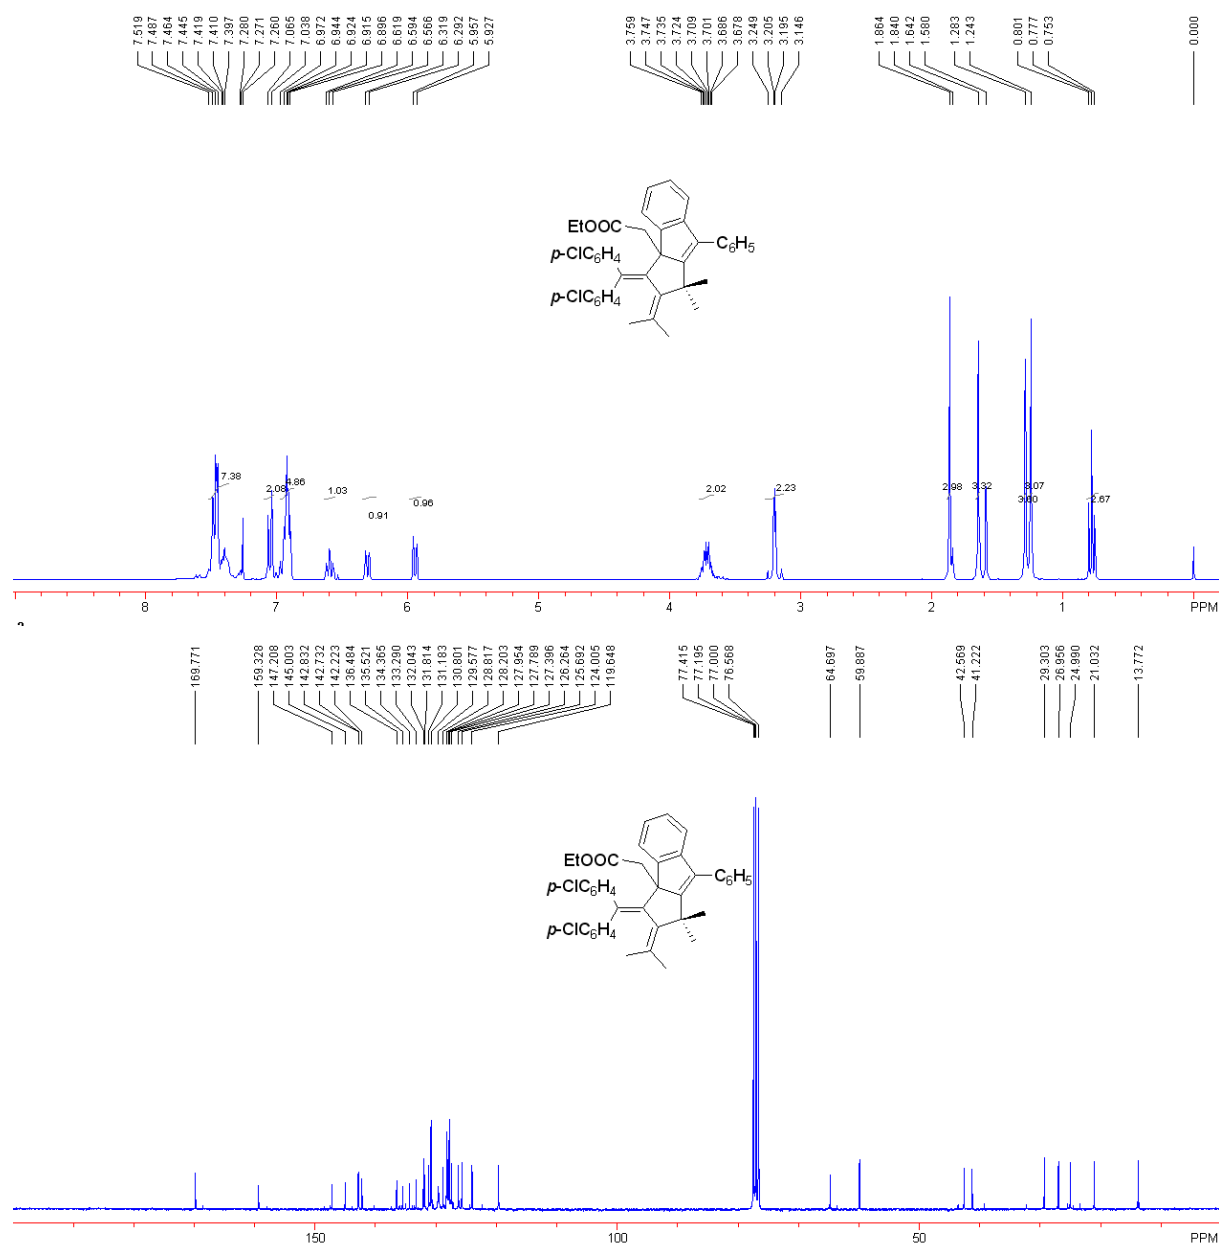

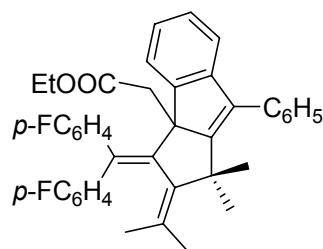

ethyl

**2-(3-(bis(4-fluorophenyl)methylene)-1,1-dimethyl-8-phenyl-2-(propan-2-ylidene)-1,2,3,3a-tetrahydrocyclopenta[a]inden-3a-yl)acetate 4d.**

A white solid, Mp: 190-192 °C; <sup>1</sup>H NMR (CDCl<sub>3</sub>, 300 MHz, TMS) δ 0.77 (t, *J* = 6.9 Hz, 3H, CH<sub>3</sub>), 1.23 (s, 3H, CH<sub>3</sub>), 1.30 (s, 3H, CH<sub>3</sub>), 1.64 (s, 3H, CH<sub>3</sub>), 1.87 (s, 3H, CH<sub>3</sub>), 3.17 (d, *J* = 13.8 Hz, 1H), 3.25 (d, *J* = 13.8 Hz, 1H), 3.66-3.76 (m, 2H, CH<sub>2</sub>), 5.92 (d, *J* = 7.8 Hz, 1H, Ar), 6.33-6.39 (m, 1H, Ar), 6.56-6.61 (m, 1H, Ar), 6.63-6.70 (m, 1H, Ar), 6.77 (t, *J* = 8.7 Hz, 2H, Ar), 6.89-6.98 (m, 4H, Ar), 7.17-7.24 (m, 1H, Ar), 7.35-7.52 (m, 6H, Ar). <sup>13</sup>C NMR (CDCl<sub>3</sub>, 75 MHz, TMS) δ 13.8, 21.0, 24.9, 26.9, 29.3, 41.2, 42.7, 59.8, 64.7, 114.4 (d, *J*<sub>C-F</sub> = 21.1 Hz), 115.8 (d, *J*<sub>C-F</sub> = 21.8 Hz), 119.6, 124.0, 125.7, 126.2, 127.4, 128.2, 129.5, 131.1 (d, *J*<sub>C-F</sub> = 7.4 Hz), 131.2, 131.3, 132.4 (d, *J*<sub>C-F</sub> = 8.3 Hz), 134.7, 135.4, 136.5, 140.1 (d, *J*<sub>C-F</sub> = 3.4 Hz), 140.6 (d, *J*<sub>C-F</sub> = 2.9 Hz), 142.0, 143.1, 145.1, 147.3, 159.5, 161.2 (d, *J*<sub>C-F</sub> = 241.6 Hz), 162.3 (d, *J*<sub>C-F</sub> = 244.8 Hz), 169.8. <sup>19</sup>F NMR (CDCl<sub>3</sub>, 282 MHz, CFCl<sub>3</sub>) δ -115.6, -116.2. IR (CH<sub>2</sub>Cl<sub>2</sub>) ν 3061, 2977, 2932, 1887, 1731, 1599, 1504, 1464, 1443, 1403, 1387, 1367, 1309, 1266, 1224, 1156, 1115, 1093, 1059, 1034, 1015, 982, 939, 911, 836, 777, 749, 739, 703, 676, 600, 584, 548 cm<sup>-1</sup>. MS (%) *m/e* 586 (M<sup>+</sup>, 57), 499 (48), 483 (28), 390 (30), 309 (31), 242 (78), 230 (100), 215 (99), 109 (39). HRMS (EI) for C<sub>40</sub>H<sub>36</sub>O<sub>2</sub>F<sub>2</sub>: 586.2683; Found: 586.2684.

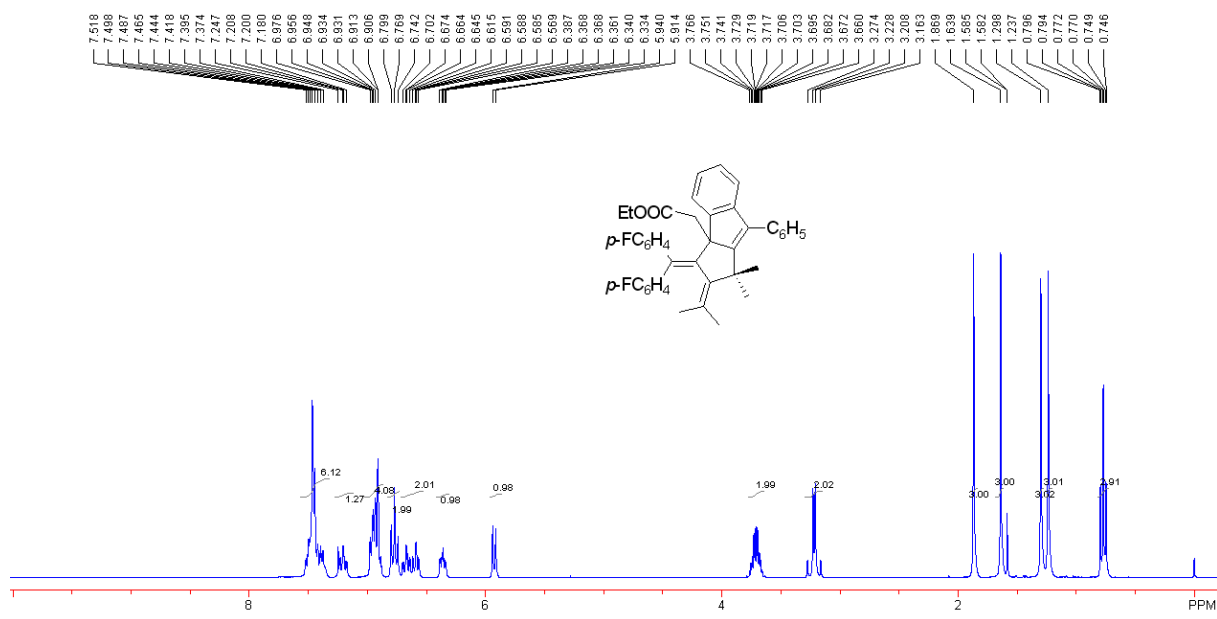

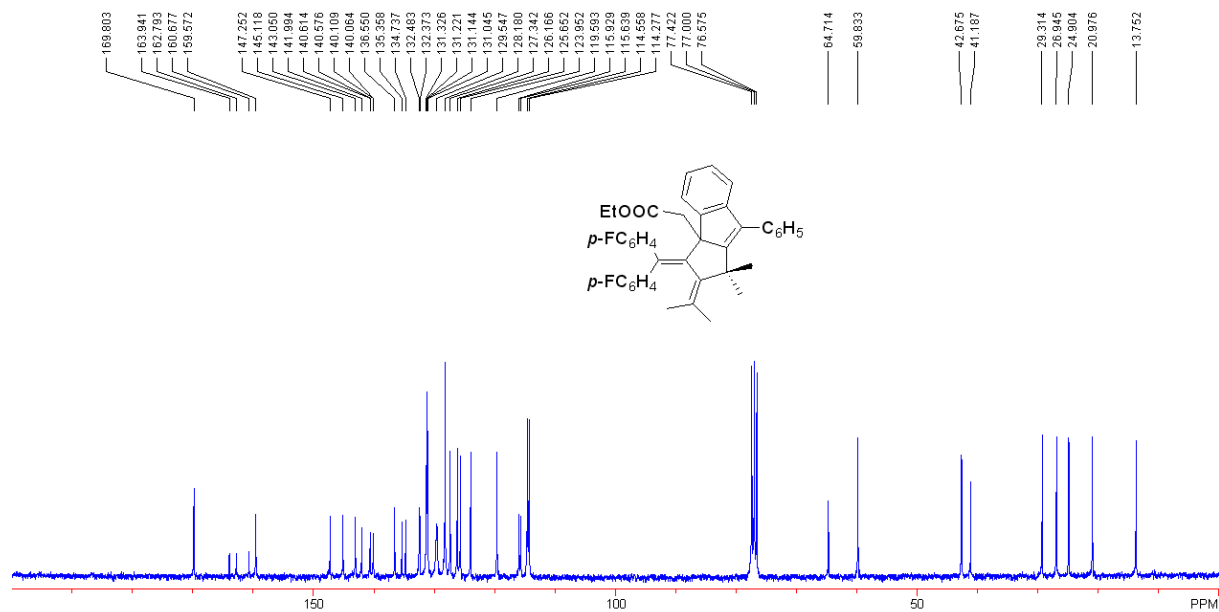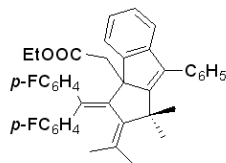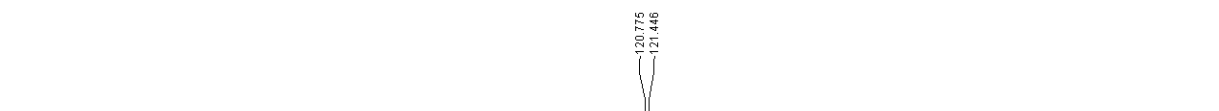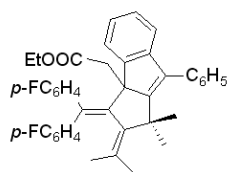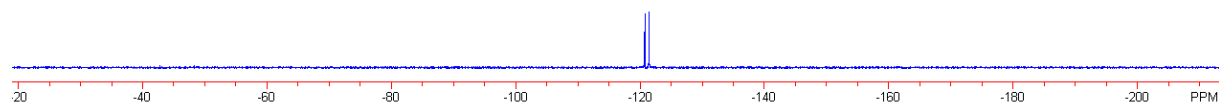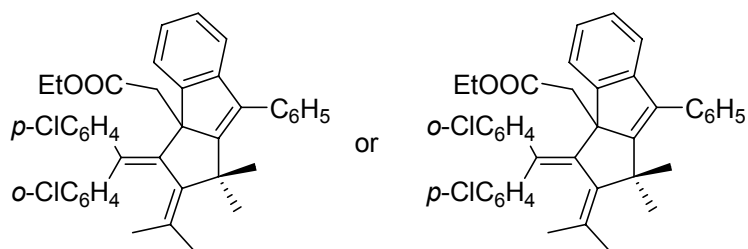

**(E)** or **(Z)-ethyl**  
**2-(3-((2-chlorophenyl)(4-chlorophenyl)methylene)-1,1-dimethyl-8-phenyl-2-(propan-2-ylidene)-1,2,3,3a-tetrahydrocyclopenta[a]inden-3a-yl)acetate 4e.**

A white solid, Mp: 164-166 °C; <sup>1</sup>H NMR (CDCl<sub>3</sub>, 300 MHz, TMS) δ 0.85 (t, *J* = 7.2 Hz, 3H, CH<sub>3</sub>), 1.24 (s, 3H, CH<sub>3</sub>), 1.32 (s, 3H, CH<sub>3</sub>), 1.65 (s, 3H, CH<sub>3</sub>), 1.86 (s, 3H, CH<sub>3</sub>), 3.06 (d, *J* =

14.1 Hz, 1H), 3.18 (d,  $J = 14.1$  Hz, 1H), 3.79 (q,  $J = 7.2$  Hz, 2H, CH<sub>2</sub>), 5.98 (d,  $J = 7.5$  Hz, 1H, Ar), 6.46 (dt,  $J = 7.8, 1.8$  Hz, 1H, Ar), 6.85 (dd,  $J = 7.8, 1.2$  Hz, 1H, Ar), 6.88-6.96 (m, 2H, Ar), 7.01-7.07 (m, 4H, Ar), 7.16 (dt,  $J = 1.5$  Hz,  $J = 7.5$  Hz, 1H, Ar), 7.35-7.45 (m, 6H, Ar), 7.59 (dd,  $J = 1.5$  Hz,  $J = 7.5$  Hz, 1H, Ar). <sup>13</sup>C NMR (CDCl<sub>3</sub>, 100 MHz, TMS)  $\delta$  13.9, 20.7, 24.8, 27.0, 29.5, 41.4, 41.6, 59.9, 64.6, 119.7, 124.0, 125.1, 125.9, 126.0, 127.3, 127.6, 128.2, 128.6, 129.5, 129.7, 130.9, 131.1, 131.3, 131.7, 135.2, 135.5, 136.7, 140.6, 141.6, 142.0, 142.6, 143.9, 148.2, 158.3, 170.2. IR (CH<sub>2</sub>Cl<sub>2</sub>)  $\nu$  2976, 2927, 2854, 2359, 2340, 1731, 1699, 1683, 1668, 1652, 1594, 1558, 1539, 1506, 1488, 1471, 1456, 1384, 1367, 1307, 1275, 1261, 1169, 1118, 1093, 1034, 750, 703 cm<sup>-1</sup>. MS (%)  $m/e$  618 (M<sup>+</sup>, 22), 531 (28), 515 (23), 341 (21), 259 (28), 229 (87), 215 (100), 117 (63). HRMS (EI) for C<sub>40</sub>H<sub>36</sub>O<sub>2</sub>Cl<sub>2</sub>Na: 641.1989; Found: 641.1985.

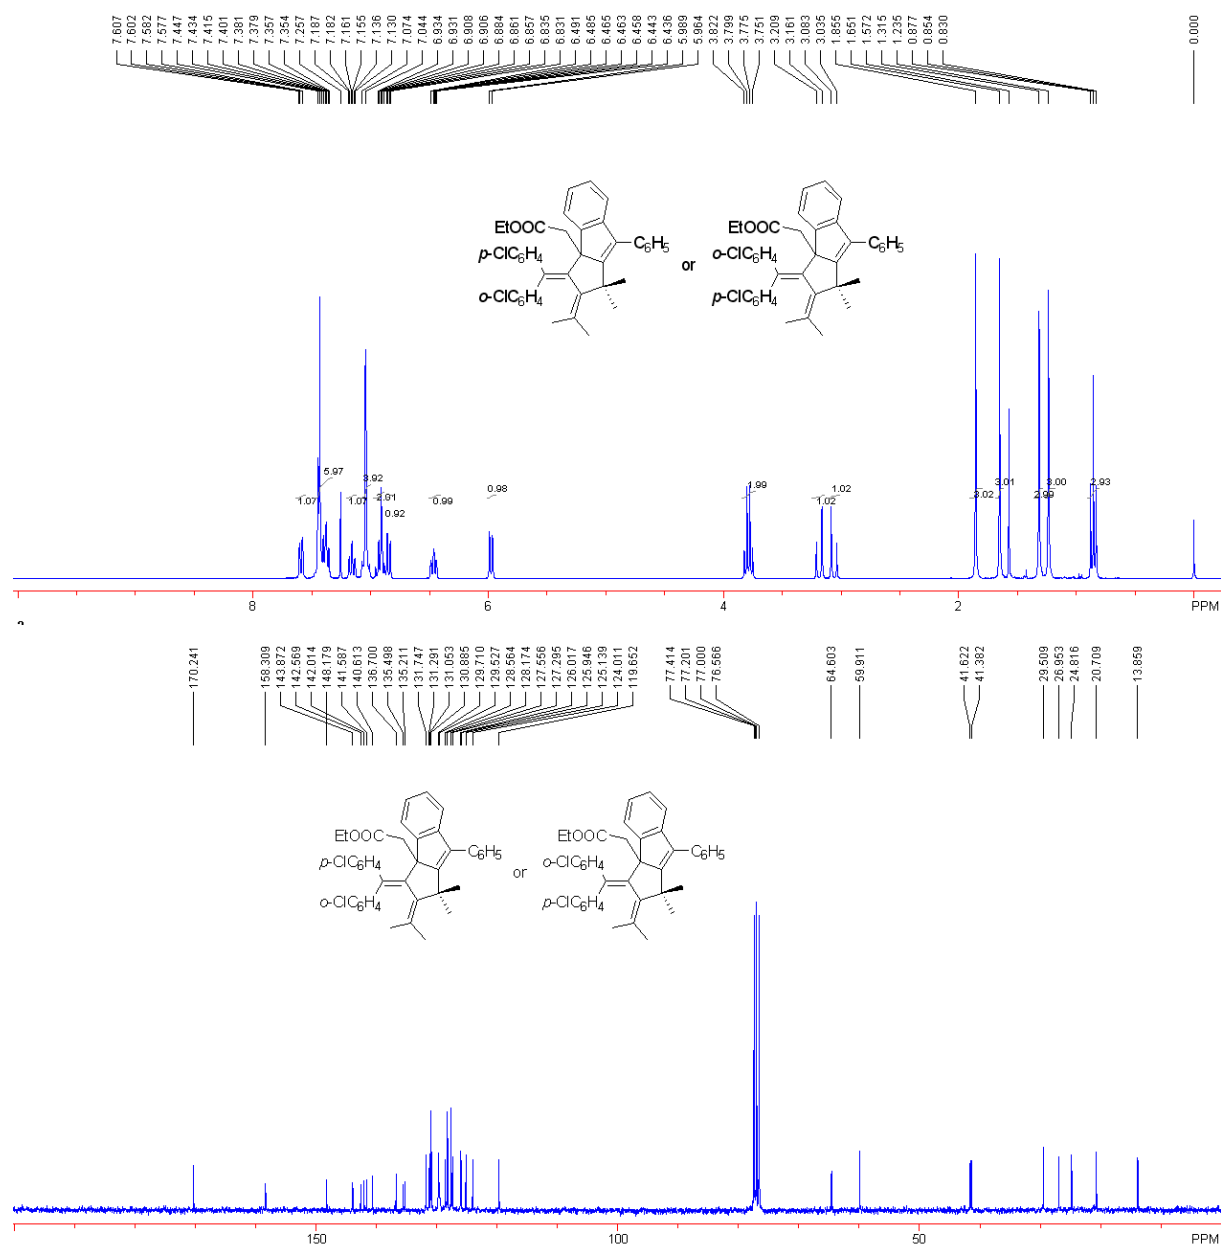

## Reference

- 1) N. R. Browne, R. F. C. Brown, F. W. Eastwood, G. D. Fallon, *Aust. J. Chem.* 1987, **40**, 1675-1686.

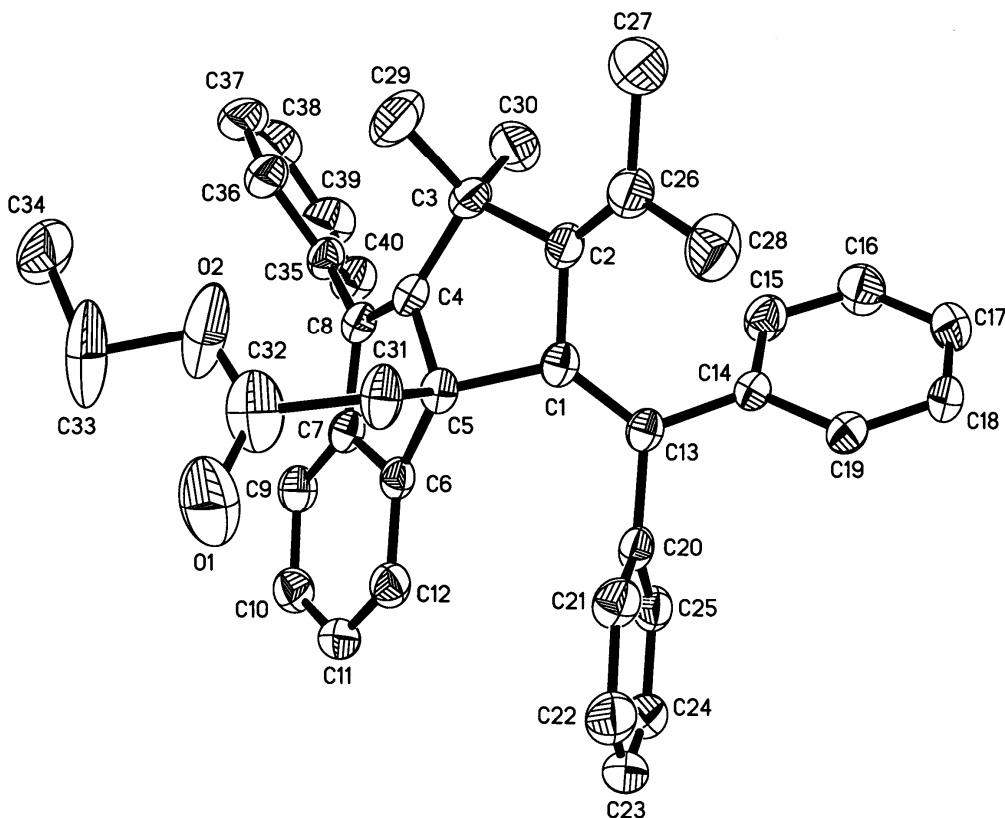

The crystal data of **3a** have been deposited in CCDC with number 689419. Empirical Formula:  $C_{40}H_{38}O_2$ ; Formula Weight: 550.70; Crystal Color, Habit: colorless, prismatic; Crystal Dimensions: 0.265 x 0.234 x 0.175 mm; Crystal System: Triclinic; Lattice Type: Primitive; Lattice Parameters:  $a = 10.8855(10)\text{\AA}$ ,  $b = 12.0229(11)\text{\AA}$ ,  $c = 13.1337(12)\text{\AA}$ ,  $\alpha = 88.141(2)^\circ$ ,  $\beta = 75.077(2)^\circ$ ,  $\gamma = 73.626(2)^\circ$ ,  $V = 1592.0(3)\text{\AA}^3$ ; Space group: P-1;  $Z = 2$ ;  $D_{calc} = 1.149\text{ g/cm}^3$ ;  $F_{000} = 588$ ; Diffractometer: Rigaku AFC7R; Residuals: R;  $R_w = 0.0757, 0.1628$ .



Table 1. Crystal data and structure refinement for cd28246.

|                                   |                                                                                                                                          |
|-----------------------------------|------------------------------------------------------------------------------------------------------------------------------------------|
| Identification code               | cd28246                                                                                                                                  |
| Empirical formula                 | C <sub>40</sub> H <sub>38</sub> O <sub>2</sub>                                                                                           |
| Formula weight                    | 550.70                                                                                                                                   |
| Temperature                       | 293(2) K                                                                                                                                 |
| Wavelength                        | 0.71073 Å                                                                                                                                |
| Crystal system, space group       | Triclinic, P-1                                                                                                                           |
| Unit cell dimensions              | a = 10.8855(10) Å    alpha = 88.141(2) deg.<br>b = 12.0229(11) Å    beta = 75.077(2) deg.<br>c = 13.1337(12) Å    gamma = 73.626(2) deg. |
| Volume                            | 1592.0(3) Å <sup>3</sup>                                                                                                                 |
| Z, Calculated density             | 2, 1.149 Mg/m <sup>3</sup>                                                                                                               |
| Absorption coefficient            | 0.069 mm <sup>-1</sup>                                                                                                                   |
| F(000)                            | 588                                                                                                                                      |
| Crystal size                      | 0.265 x 0.234 x 0.175 mm                                                                                                                 |
| Theta range for data collection   | 1.61 to 25.50 deg.                                                                                                                       |
| Limiting indices                  | -10 ≤ h ≤ 13, -14 ≤ k ≤ 14, -14 ≤ l ≤ 15                                                                                                 |
| Reflections collected / unique    | 8447 / 5832 [R(int) = 0.0489]                                                                                                            |
| Completeness to theta = 25.50     | 98.5 %                                                                                                                                   |
| Absorption correction             | Empirical                                                                                                                                |
| Max. and min. transmission        | 1.00000 and 0.75212                                                                                                                      |
| Refinement method                 | Full-matrix least-squares on F <sup>2</sup>                                                                                              |
| Data / restraints / parameters    | 5832 / 2 / 395                                                                                                                           |
| Goodness-of-fit on F <sup>2</sup> | 0.941                                                                                                                                    |
| Final R indices [I > 2σ(I)]       | R1 = 0.0757, wR2 = 0.1628                                                                                                                |
| R indices (all data)              | R1 = 0.1545, wR2 = 0.1982                                                                                                                |
| Largest diff. peak and hole       | 0.309 and -0.206 e.Å <sup>-3</sup>                                                                                                       |

Table 2. Atomic coordinates ( $\times 10^4$ ) and equivalent isotropic displacement parameters ( $\text{\AA}^2 \times 10^3$ ) for cd28246. U(eq) is defined as one third of the trace of the orthogonalized Uij tensor.

|        | x         | y        | z         | U(eq)   |
|--------|-----------|----------|-----------|---------|
| O(1)   | 12306(4)  | -152(4)  | -137(3)   | 112(2)  |
| O(2)   | 11995(4)  | 1721(4)  | -112(3)   | 115(2)  |
| C(1)   | 8587(3)   | 1843(3)  | 2598(2)   | 43(1)   |
| C(2)   | 7985(4)   | 3008(3)  | 2229(3)   | 54(1)   |
| C(3)   | 9059(4)   | 3671(3)  | 1997(3)   | 59(1)   |
| C(4)   | 10263(4)  | 2727(3)  | 2075(2)   | 44(1)   |
| C(5)   | 10074(3)  | 1519(3)  | 1995(2)   | 43(1)   |
| C(6)   | 11196(3)  | 765(3)   | 2423(2)   | 43(1)   |
| C(7)   | 11969(4)  | 1467(3)  | 2597(2)   | 45(1)   |
| C(8)   | 11344(4)  | 2674(3)  | 2414(2)   | 44(1)   |
| C(9)   | 13132(4)  | 971(3)   | 2888(3)   | 56(1)   |
| C(10)  | 13543(4)  | -222(3)  | 2982(3)   | 65(1)   |
| C(11)  | 12794(4)  | -899(3)  | 2794(3)   | 62(1)   |
| C(12)  | 11655(4)  | -429(3)  | 2499(3)   | 55(1)   |
| C(13)  | 7959(3)   | 1262(3)  | 3358(2)   | 42(1)   |
| C(14)  | 6664(3)   | 1811(3)  | 4105(2)   | 43(1)   |
| C(15)  | 6428(4)   | 2856(3)  | 4660(3)   | 61(1)   |
| C(16)  | 5246(5)   | 3321(3)  | 5390(3)   | 74(1)   |
| C(17)  | 4256(4)   | 2781(3)  | 5579(3)   | 73(1)   |
| C(18)  | 4472(4)   | 1766(3)  | 5064(3)   | 59(1)   |
| C(19)  | 5654(4)   | 1285(3)  | 4354(3)   | 53(1)   |
| C(20)  | 8504(3)   | -7(3)    | 3491(3)   | 45(1)   |
| C(21)  | 8581(4)   | -803(3)  | 2723(3)   | 58(1)   |
| C(22)  | 9041(4)   | -1976(4) | 2838(4)   | 75(1)   |
| C(23)  | 9436(4)   | -2370(3) | 3721(4)   | 78(1)   |
| C(24)  | 9359(4)   | -1613(4) | 4500(3)   | 70(1)   |
| C(25)  | 8871(4)   | -433(3)  | 4397(3)   | 54(1)   |
| C(26)  | 6837(4)   | 3317(4)  | 1980(3)   | 69(1)   |
| C(27)  | 6212(5)   | 4522(4)  | 1647(4)   | 114(2)  |
| C(28)  | 5969(4)   | 2546(4)  | 1985(3)   | 86(1)   |
| C(29)  | 9280(5)   | 4176(4)  | 892(4)    | 106(2)  |
| C(30)  | 8677(5)   | 4643(3)  | 2863(4)   | 94(2)   |
| C(31)  | 10233(4)  | 1078(3)  | 856(3)    | 64(1)   |
| C(32)  | 11635(6)  | 852(6)   | 153(4)    | 100(2)  |
| C(33)  | 13408(7)  | 1430(7)  | -728(6)   | 118(3)  |
| C(35)  | 11828(4)  | 3661(3)  | 2626(3)   | 51(1)   |
| C(36)  | 12068(4)  | 4449(3)  | 1867(3)   | 65(1)   |
| C(37)  | 12453(5)  | 5402(3)  | 2091(5)   | 85(1)   |
| C(38)  | 12621(5)  | 5548(4)  | 3058(5)   | 89(2)   |
| C(39)  | 12438(5)  | 4752(4)  | 3815(4)   | 85(1)   |
| C(40)  | 12049(4)  | 3816(3)  | 3596(3)   | 67(1)   |
| C(34)  | 13650(30) | 2549(15) | -1000(30) | 113(15) |
| C(34') | 14148(10) | 1880(20) | -232(12)  | 117(9)  |

Table 3. Bond lengths [Å] and angles [deg] for cd28246.

|              |           |
|--------------|-----------|
| O(1)-C(32)   | 1.235 (6) |
| O(2)-C(32)   | 1.227 (6) |
| O(2)-C(33)   | 1.489 (7) |
| C(1)-C(13)   | 1.351 (4) |
| C(1)-C(2)    | 1.492 (4) |
| C(1)-C(5)    | 1.551 (5) |
| C(2)-C(26)   | 1.321 (5) |
| C(2)-C(3)    | 1.557 (5) |
| C(3)-C(4)    | 1.496 (5) |
| C(3)-C(29)   | 1.543 (5) |
| C(3)-C(30)   | 1.548 (5) |
| C(4)-C(8)    | 1.346 (4) |
| C(4)-C(5)    | 1.534 (4) |
| C(5)-C(6)    | 1.524 (5) |
| C(5)-C(31)   | 1.554 (4) |
| C(6)-C(12)   | 1.390 (4) |
| C(6)-C(7)    | 1.409 (4) |
| C(7)-C(9)    | 1.383 (5) |
| C(7)-C(8)    | 1.460 (4) |
| C(8)-C(35)   | 1.487 (4) |
| C(9)-C(10)   | 1.388 (5) |
| C(9)-H(9)    | 0.9300    |
| C(10)-C(11)  | 1.372 (5) |
| C(10)-H(10)  | 0.9300    |
| C(11)-C(12)  | 1.359 (5) |
| C(11)-H(11)  | 0.9300    |
| C(12)-H(12)  | 0.9300    |
| C(13)-C(14)  | 1.480 (4) |
| C(13)-C(20)  | 1.495 (4) |
| C(14)-C(19)  | 1.381 (4) |
| C(14)-C(15)  | 1.399 (4) |
| C(15)-C(16)  | 1.372 (5) |
| C(15)-H(15)  | 0.9300    |
| C(16)-C(17)  | 1.375 (5) |
| C(16)-H(16)  | 0.9300    |
| C(17)-C(18)  | 1.346 (5) |
| C(17)-H(17)  | 0.9300    |
| C(18)-C(19)  | 1.363 (5) |
| C(18)-H(18)  | 0.9300    |
| C(19)-H(19)  | 0.9300    |
| C(20)-C(21)  | 1.384 (4) |
| C(20)-C(25)  | 1.388 (5) |
| C(21)-C(22)  | 1.375 (5) |
| C(21)-H(21)  | 0.9300    |
| C(22)-C(23)  | 1.365 (6) |
| C(22)-H(22)  | 0.9300    |
| C(23)-C(24)  | 1.361 (5) |
| C(23)-H(23)  | 0.9300    |
| C(24)-C(25)  | 1.383 (5) |
| C(24)-H(24)  | 0.9300    |
| C(25)-H(25)  | 0.9300    |
| C(26)-C(28)  | 1.497 (5) |
| C(26)-C(27)  | 1.521 (5) |
| C(27)-H(27A) | 0.9600    |
| C(27)-H(27B) | 0.9600    |
| C(27)-H(27C) | 0.9600    |
| C(28)-H(28A) | 0.9600    |
| C(28)-H(28B) | 0.9600    |
| C(28)-H(28C) | 0.9600    |
| C(29)-H(29A) | 0.9600    |
| C(29)-H(29B) | 0.9600    |
| C(29)-H(29C) | 0.9600    |
| C(30)-H(30A) | 0.9600    |
| C(30)-H(30B) | 0.9600    |
| C(30)-H(30C) | 0.9600    |
| C(31)-C(32)  | 1.520 (6) |
| C(31)-H(31A) | 0.9700    |
| C(31)-H(31B) | 0.9700    |

|                   |           |
|-------------------|-----------|
| C(33)-C(34')      | 1.380(9)  |
| C(33)-C(34)       | 1.456(13) |
| C(33)-H(33A)      | 0.9700    |
| C(33)-H(33B)      | 0.9700    |
| C(33)-H(33C)      | 0.9600    |
| C(33)-H(33D)      | 0.9600    |
| C(35)-C(36)       | 1.380(5)  |
| C(35)-C(40)       | 1.383(5)  |
| C(36)-C(37)       | 1.389(5)  |
| C(36)-H(36)       | 0.9300    |
| C(37)-C(38)       | 1.353(6)  |
| C(37)-H(37)       | 0.9300    |
| C(38)-C(39)       | 1.374(6)  |
| C(38)-H(38)       | 0.9300    |
| C(39)-C(40)       | 1.371(5)  |
| C(39)-H(39)       | 0.9300    |
| C(40)-H(40)       | 0.9300    |
| C(34)-H(33C)      | 1.1701    |
| C(34)-H(34A)      | 0.9600    |
| C(34)-H(34B)      | 0.9600    |
| C(34)-H(34C)      | 0.9600    |
| C(34')-H(34D)     | 0.9600    |
| C(34')-H(34E)     | 0.9600    |
| C(34')-H(34F)     | 0.9600    |
|                   |           |
| C(32)-O(2)-C(33)  | 112.2(6)  |
| C(13)-C(1)-C(2)   | 125.9(3)  |
| C(13)-C(1)-C(5)   | 128.6(3)  |
| C(2)-C(1)-C(5)    | 105.3(3)  |
| C(26)-C(2)-C(1)   | 124.8(3)  |
| C(26)-C(2)-C(3)   | 127.0(3)  |
| C(1)-C(2)-C(3)    | 107.3(3)  |
| C(4)-C(3)-C(29)   | 110.4(3)  |
| C(4)-C(3)-C(30)   | 111.7(3)  |
| C(29)-C(3)-C(30)  | 110.6(3)  |
| C(4)-C(3)-C(2)    | 101.4(3)  |
| C(29)-C(3)-C(2)   | 113.6(3)  |
| C(30)-C(3)-C(2)   | 109.0(3)  |
| C(8)-C(4)-C(3)    | 135.0(3)  |
| C(8)-C(4)-C(5)    | 111.3(3)  |
| C(3)-C(4)-C(5)    | 111.9(3)  |
| C(6)-C(5)-C(4)    | 101.7(3)  |
| C(6)-C(5)-C(31)   | 109.4(3)  |
| C(4)-C(5)-C(31)   | 114.7(3)  |
| C(6)-C(5)-C(1)    | 124.5(3)  |
| C(4)-C(5)-C(1)    | 96.9(2)   |
| C(31)-C(5)-C(1)   | 109.0(3)  |
| C(12)-C(6)-C(7)   | 118.9(3)  |
| C(12)-C(6)-C(5)   | 132.1(3)  |
| C(7)-C(6)-C(5)    | 108.1(3)  |
| C(9)-C(7)-C(6)    | 119.9(3)  |
| C(9)-C(7)-C(8)    | 130.4(3)  |
| C(6)-C(7)-C(8)    | 109.7(3)  |
| C(4)-C(8)-C(7)    | 108.9(3)  |
| C(4)-C(8)-C(35)   | 127.3(3)  |
| C(7)-C(8)-C(35)   | 123.8(3)  |
| C(7)-C(9)-C(10)   | 119.6(4)  |
| C(7)-C(9)-H(9)    | 120.2     |
| C(10)-C(9)-H(9)   | 120.2     |
| C(11)-C(10)-C(9)  | 120.0(4)  |
| C(11)-C(10)-H(10) | 120.0     |
| C(9)-C(10)-H(10)  | 120.0     |
| C(12)-C(11)-C(10) | 121.2(4)  |
| C(12)-C(11)-H(11) | 119.4     |
| C(10)-C(11)-H(11) | 119.4     |
| C(11)-C(12)-C(6)  | 120.2(3)  |
| C(11)-C(12)-H(12) | 119.9     |
| C(6)-C(12)-H(12)  | 119.9     |
| C(1)-C(13)-C(14)  | 123.2(3)  |
| C(1)-C(13)-C(20)  | 122.4(3)  |
| C(14)-C(13)-C(20) | 114.4(3)  |
| C(19)-C(14)-C(15) | 116.0(3)  |

|                     |          |
|---------------------|----------|
| C(19)-C(14)-C(13)   | 122.2(3) |
| C(15)-C(14)-C(13)   | 121.6(3) |
| C(16)-C(15)-C(14)   | 120.8(3) |
| C(16)-C(15)-H(15)   | 119.6    |
| C(14)-C(15)-H(15)   | 119.6    |
| C(15)-C(16)-C(17)   | 120.7(4) |
| C(15)-C(16)-H(16)   | 119.6    |
| C(17)-C(16)-H(16)   | 119.6    |
| C(18)-C(17)-C(16)   | 119.3(4) |
| C(18)-C(17)-H(17)   | 120.3    |
| C(16)-C(17)-H(17)   | 120.3    |
| C(17)-C(18)-C(19)   | 120.3(4) |
| C(17)-C(18)-H(18)   | 119.8    |
| C(19)-C(18)-H(18)   | 119.8    |
| C(18)-C(19)-C(14)   | 122.8(3) |
| C(18)-C(19)-H(19)   | 118.6    |
| C(14)-C(19)-H(19)   | 118.6    |
| C(21)-C(20)-C(25)   | 117.8(3) |
| C(21)-C(20)-C(13)   | 119.9(3) |
| C(25)-C(20)-C(13)   | 122.2(3) |
| C(22)-C(21)-C(20)   | 121.2(4) |
| C(22)-C(21)-H(21)   | 119.4    |
| C(20)-C(21)-H(21)   | 119.4    |
| C(23)-C(22)-C(21)   | 119.8(4) |
| C(23)-C(22)-H(22)   | 120.1    |
| C(21)-C(22)-H(22)   | 120.1    |
| C(24)-C(23)-C(22)   | 120.7(4) |
| C(24)-C(23)-H(23)   | 119.7    |
| C(22)-C(23)-H(23)   | 119.7    |
| C(23)-C(24)-C(25)   | 119.7(4) |
| C(23)-C(24)-H(24)   | 120.2    |
| C(25)-C(24)-H(24)   | 120.2    |
| C(24)-C(25)-C(20)   | 120.8(3) |
| C(24)-C(25)-H(25)   | 119.6    |
| C(20)-C(25)-H(25)   | 119.6    |
| C(2)-C(26)-C(28)    | 125.5(4) |
| C(2)-C(26)-C(27)    | 124.1(4) |
| C(28)-C(26)-C(27)   | 110.3(4) |
| C(26)-C(27)-H(27A)  | 109.5    |
| C(26)-C(27)-H(27B)  | 109.5    |
| H(27A)-C(27)-H(27B) | 109.5    |
| C(26)-C(27)-H(27C)  | 109.5    |
| H(27A)-C(27)-H(27C) | 109.5    |
| H(27B)-C(27)-H(27C) | 109.5    |
| C(26)-C(28)-H(28A)  | 109.5    |
| C(26)-C(28)-H(28B)  | 109.5    |
| H(28A)-C(28)-H(28B) | 109.5    |
| C(26)-C(28)-H(28C)  | 109.5    |
| H(28A)-C(28)-H(28C) | 109.5    |
| H(28B)-C(28)-H(28C) | 109.5    |
| C(3)-C(29)-H(29A)   | 109.5    |
| C(3)-C(29)-H(29B)   | 109.5    |
| H(29A)-C(29)-H(29B) | 109.5    |
| C(3)-C(29)-H(29C)   | 109.5    |
| H(29A)-C(29)-H(29C) | 109.5    |
| H(29B)-C(29)-H(29C) | 109.5    |
| C(3)-C(30)-H(30A)   | 109.5    |
| C(3)-C(30)-H(30B)   | 109.5    |
| H(30A)-C(30)-H(30B) | 109.5    |
| C(3)-C(30)-H(30C)   | 109.5    |
| H(30A)-C(30)-H(30C) | 109.5    |
| H(30B)-C(30)-H(30C) | 109.5    |
| C(32)-C(31)-C(5)    | 113.7(3) |
| C(32)-C(31)-H(31A)  | 108.8    |
| C(5)-C(31)-H(31A)   | 108.8    |
| C(32)-C(31)-H(31B)  | 108.8    |
| C(5)-C(31)-H(31B)   | 108.8    |
| H(31A)-C(31)-H(31B) | 107.7    |
| O(1)-C(32)-O(2)     | 124.7(6) |
| O(1)-C(32)-C(31)    | 120.0(6) |
| O(2)-C(32)-C(31)    | 115.3(6) |
| C(34')-C(33)-C(34)  | 58.6(12) |

---

|                      |           |
|----------------------|-----------|
| C(34')-C(33)-O(2)    | 111.3(6)  |
| C(34)-C(33)-O(2)     | 104.5(12) |
| C(34')-C(33)-H(33A)  | 53.7      |
| C(34)-C(33)-H(33A)   | 110.9     |
| O(2)-C(33)-H(33A)    | 110.9     |
| C(34')-C(33)-H(33B)  | 137.9     |
| C(34)-C(33)-H(33B)   | 110.8     |
| O(2)-C(33)-H(33B)    | 110.8     |
| H(33A)-C(33)-H(33B)  | 108.9     |
| C(34')-C(33)-H(33C)  | 106.6     |
| C(34)-C(33)-H(33C)   | 53.3      |
| O(2)-C(33)-H(33C)    | 108.8     |
| H(33A)-C(33)-H(33C)  | 140.1     |
| H(33B)-C(33)-H(33C)  | 59.7      |
| C(34')-C(33)-H(33D)  | 111.8     |
| C(34)-C(33)-H(33D)   | 146.2     |
| O(2)-C(33)-H(33D)    | 108.8     |
| H(33A)-C(33)-H(33D)  | 61.4      |
| H(33B)-C(33)-H(33D)  | 51.8      |
| H(33C)-C(33)-H(33D)  | 109.4     |
| C(36)-C(35)-C(40)    | 118.0(3)  |
| C(36)-C(35)-C(8)     | 121.3(3)  |
| C(40)-C(35)-C(8)     | 120.8(3)  |
| C(35)-C(36)-C(37)    | 120.8(4)  |
| C(35)-C(36)-H(36)    | 119.6     |
| C(37)-C(36)-H(36)    | 119.6     |
| C(38)-C(37)-C(36)    | 119.7(4)  |
| C(38)-C(37)-H(37)    | 120.1     |
| C(36)-C(37)-H(37)    | 120.1     |
| C(37)-C(38)-C(39)    | 120.6(4)  |
| C(37)-C(38)-H(38)    | 119.7     |
| C(39)-C(38)-H(38)    | 119.7     |
| C(38)-C(39)-C(40)    | 119.6(4)  |
| C(38)-C(39)-H(39)    | 120.2     |
| C(40)-C(39)-H(39)    | 120.2     |
| C(39)-C(40)-C(35)    | 121.2(4)  |
| C(39)-C(40)-H(40)    | 119.4     |
| C(35)-C(40)-H(40)    | 119.4     |
| C(33)-C(34)-H(33C)   | 41.1      |
| C(33)-C(34)-H(34A)   | 109.4     |
| H(33C)-C(34)-H(34A)  | 143.5     |
| C(33)-C(34)-H(34B)   | 109.5     |
| H(33C)-C(34)-H(34B)  | 74.5      |
| C(33)-C(34)-H(34C)   | 109.5     |
| H(33C)-C(34)-H(34C)  | 102.5     |
| C(33)-C(34')-H(34D)  | 109.5     |
| C(33)-C(34')-H(34E)  | 109.5     |
| H(34D)-C(34')-H(34E) | 109.5     |
| C(33)-C(34')-H(34F)  | 109.5     |
| H(34D)-C(34')-H(34F) | 109.5     |
| H(34E)-C(34')-H(34F) | 109.5     |

---

Symmetry transformations used to generate equivalent atoms:

Table 4. Anisotropic displacement parameters ( $\text{Å}^2 \times 10^3$ ) for cd28246. The anisotropic displacement factor exponent takes the form:  
 $-2 \pi^2 [ h^2 a^{*2} U_{11} + \dots + 2 h k a^* b^* U_{12} ]$

|        | U11     | U22     | U33     | U23     | U13    | U12     |
|--------|---------|---------|---------|---------|--------|---------|
| O(1)   | 117(4)  | 161(4)  | 105(3)  | -42(3)  | 10(3)  | -37(3)  |
| O(2)   | 125(4)  | 175(4)  | 97(3)   | -40(3)  | 48(3)  | -118(4) |
| C(1)   | 43(2)   | 52(2)   | 40(2)   | -1(2)   | -11(2) | -22(2)  |
| C(2)   | 45(3)   | 63(2)   | 52(2)   | 15(2)   | -8(2)  | -21(2)  |
| C(3)   | 52(3)   | 54(2)   | 74(3)   | 23(2)   | -14(2) | -23(2)  |
| C(4)   | 45(2)   | 50(2)   | 39(2)   | 7(2)    | -7(2)  | -23(2)  |
| C(5)   | 44(2)   | 51(2)   | 38(2)   | -5(2)   | -7(2)  | -21(2)  |
| C(6)   | 44(2)   | 47(2)   | 36(2)   | -5(2)   | 0(2)   | -18(2)  |
| C(7)   | 47(2)   | 54(2)   | 36(2)   | 2(2)    | -8(2)  | -22(2)  |
| C(8)   | 47(2)   | 51(2)   | 38(2)   | 0(2)    | -5(2)  | -24(2)  |
| C(9)   | 48(3)   | 70(3)   | 55(2)   | -2(2)   | -13(2) | -25(2)  |
| C(10)  | 49(3)   | 70(3)   | 70(3)   | 11(2)   | -11(2) | -11(2)  |
| C(11)  | 53(3)   | 49(2)   | 78(3)   | 4(2)    | -6(2)  | -13(2)  |
| C(12)  | 49(3)   | 53(2)   | 64(3)   | -6(2)   | -4(2)  | -22(2)  |
| C(13)  | 42(2)   | 49(2)   | 39(2)   | 0(2)    | -10(2) | -21(2)  |
| C(14)  | 40(2)   | 42(2)   | 47(2)   | 4(2)    | -9(2)  | -16(2)  |
| C(15)  | 64(3)   | 57(2)   | 63(3)   | -6(2)   | -4(2)  | -28(2)  |
| C(16)  | 74(3)   | 61(3)   | 77(3)   | -21(2)  | -1(3)  | -19(2)  |
| C(17)  | 53(3)   | 65(3)   | 82(3)   | -2(2)   | 8(2)   | -9(2)   |
| C(18)  | 42(3)   | 63(3)   | 68(3)   | 14(2)   | -2(2)  | -20(2)  |
| C(19)  | 50(3)   | 44(2)   | 65(2)   | 4(2)    | -9(2)  | -20(2)  |
| C(20)  | 41(2)   | 51(2)   | 46(2)   | -2(2)   | -2(2)  | -22(2)  |
| C(21)  | 67(3)   | 57(2)   | 54(2)   | -8(2)   | -10(2) | -30(2)  |
| C(22)  | 76(3)   | 58(3)   | 88(3)   | -18(2)  | -1(3)  | -32(3)  |
| C(23)  | 65(3)   | 44(2)   | 105(4)  | -1(3)   | 8(3)   | -13(2)  |
| C(24)  | 60(3)   | 62(3)   | 77(3)   | 19(2)   | -5(2)  | -13(2)  |
| C(25)  | 51(3)   | 58(2)   | 49(2)   | -1(2)   | -2(2)  | -19(2)  |
| C(26)  | 53(3)   | 81(3)   | 73(3)   | 28(2)   | -19(2) | -21(3)  |
| C(27)  | 68(4)   | 122(4)  | 152(5)  | 57(4)   | -38(4) | -25(3)  |
| C(28)  | 68(3)   | 122(4)  | 88(3)   | 25(3)   | -38(3) | -44(3)  |
| C(29)  | 77(4)   | 135(4)  | 118(4)  | 80(3)   | -31(3) | -51(3)  |
| C(30)  | 69(3)   | 52(3)   | 154(5)  | -8(3)   | -6(3)  | -23(2)  |
| C(31)  | 59(3)   | 97(3)   | 42(2)   | -13(2)  | -3(2)  | -39(2)  |
| C(32)  | 108(5)  | 151(6)  | 43(3)   | -39(3)  | -13(3) | -44(4)  |
| C(33)  | 74(5)   | 183(10) | 88(5)   | -38(5)  | 42(4)  | -69(6)  |
| C(35)  | 48(2)   | 52(2)   | 55(2)   | 1(2)    | -8(2)  | -25(2)  |
| C(36)  | 63(3)   | 61(3)   | 76(3)   | 13(2)   | -14(2) | -30(2)  |
| C(37)  | 76(4)   | 58(3)   | 127(4)  | 23(3)   | -23(3) | -34(3)  |
| C(38)  | 76(4)   | 61(3)   | 139(5)  | -13(3)  | -27(3) | -30(3)  |
| C(39)  | 95(4)   | 75(3)   | 100(4)  | -8(3)   | -36(3) | -38(3)  |
| C(40)  | 79(3)   | 62(3)   | 70(3)   | -4(2)   | -19(2) | -37(2)  |
| C(34)  | 130(20) | 78(14)  | 150(30) | 0(12)   | 25(19) | -64(15) |
| C(34') | 69(7)   | 210(20) | 112(11) | -68(13) | 4(6)   | -72(10) |

Table 5. Hydrogen coordinates ( $\times 10^4$ ) and isotropic displacement parameters ( $\text{\AA}^2 \times 10^3$ ) for cd28246.

|        | x     | y     | z     | U (eq) |
|--------|-------|-------|-------|--------|
| H(9)   | 13635 | 1433  | 3020  | 68     |
| H(10)  | 14328 | -562  | 3172  | 78     |
| H(11)  | 13071 | -1696 | 2871  | 75     |
| H(12)  | 11180 | -907  | 2347  | 66     |
| H(15)  | 7081  | 3240  | 4532  | 74     |
| H(16)  | 5112  | 4009  | 5761  | 88     |
| H(17)  | 3446  | 3113  | 6058  | 88     |
| H(18)  | 3811  | 1391  | 5193  | 71     |
| H(19)  | 5787  | 573   | 4024  | 63     |
| H(21)  | 8317  | -539  | 2117  | 69     |
| H(22)  | 9083  | -2499 | 2316  | 89     |
| H(23)  | 9761  | -3163 | 3792  | 93     |
| H(24)  | 9633  | -1888 | 5099  | 84     |
| H(25)  | 8787  | 81    | 4941  | 65     |
| H(27A) | 6690  | 5043  | 1769  | 130    |
| H(27B) | 5305  | 4795  | 2051  | 130    |
| H(27C) | 6244  | 4491  | 911   | 130    |
| H(28A) | 6463  | 1752  | 2018  | 119    |
| H(28B) | 5670  | 2641  | 1353  | 119    |
| H(28C) | 5218  | 2751  | 2588  | 119    |
| H(29A) | 10118 | 4347  | 708   | 130    |
| H(29B) | 8582  | 4875  | 895   | 130    |
| H(29C) | 9277  | 3620  | 384   | 130    |
| H(30A) | 8636  | 4304  | 3538  | 132    |
| H(30B) | 7828  | 5165  | 2864  | 132    |
| H(30C) | 9331  | 5061  | 2722  | 132    |
| H(31A) | 9974  | 367   | 891   | 77     |
| H(31B) | 9635  | 1650  | 538   | 77     |
| H(33A) | 13988 | 1007  | -308  | 141    |
| H(33B) | 13553 | 964   | -1360 | 141    |
| H(33C) | 13456 | 1782  | -1398 | 141    |
| H(33D) | 13750 | 602   | -837  | 141    |
| H(36)  | 11970 | 4342  | 1197  | 78     |
| H(37)  | 12595 | 5936  | 1578  | 102    |
| H(38)  | 12863 | 6194  | 3212  | 107    |
| H(39)  | 12577 | 4847  | 4472  | 102    |
| H(40)  | 11931 | 3276  | 4109  | 80     |
| H(34A) | 13350 | 3046  | -370  | 134    |
| H(34B) | 13169 | 2898  | -1500 | 134    |
| H(34C) | 14577 | 2441  | -1292 | 134    |
| H(34D) | 14875 | 2035  | -750  | 136    |
| H(34E) | 14483 | 1331  | 248   | 136    |
| H(34F) | 13599 | 2589  | 152   | 136    |



Table 6. Torsion angles [deg] for cd28246.

|                         |           |
|-------------------------|-----------|
| C(13)-C(1)-C(2)-C(26)   | -47.9(5)  |
| C(5)-C(1)-C(2)-C(26)    | 136.7(4)  |
| C(13)-C(1)-C(2)-C(3)    | 142.5(3)  |
| C(5)-C(1)-C(2)-C(3)     | -32.9(3)  |
| C(26)-C(2)-C(3)-C(4)    | -159.5(4) |
| C(1)-C(2)-C(3)-C(4)     | 9.8(4)    |
| C(26)-C(2)-C(3)-C(29)   | -41.2(6)  |
| C(1)-C(2)-C(3)-C(29)    | 128.2(3)  |
| C(26)-C(2)-C(3)-C(30)   | 82.6(5)   |
| C(1)-C(2)-C(3)-C(30)    | -108.1(4) |
| C(29)-C(3)-C(4)-C(8)    | 93.9(5)   |
| C(30)-C(3)-C(4)-C(8)    | -29.6(5)  |
| C(2)-C(3)-C(4)-C(8)     | -145.5(4) |
| C(29)-C(3)-C(4)-C(5)    | -103.1(3) |
| C(30)-C(3)-C(4)-C(5)    | 133.4(3)  |
| C(2)-C(3)-C(4)-C(5)     | 17.5(4)   |
| C(8)-C(4)-C(5)-C(6)     | 3.7(3)    |
| C(3)-C(4)-C(5)-C(6)     | -163.4(3) |
| C(8)-C(4)-C(5)-C(31)    | -114.2(3) |
| C(3)-C(4)-C(5)-C(31)    | 78.6(4)   |
| C(8)-C(4)-C(5)-C(1)     | 131.2(3)  |
| C(3)-C(4)-C(5)-C(1)     | -36.0(3)  |
| C(13)-C(1)-C(5)-C(6)    | -25.7(5)  |
| C(2)-C(1)-C(5)-C(6)     | 149.6(3)  |
| C(13)-C(1)-C(5)-C(4)    | -135.0(3) |
| C(2)-C(1)-C(5)-C(4)     | 40.3(3)   |
| C(13)-C(1)-C(5)-C(31)   | 105.9(4)  |
| C(2)-C(1)-C(5)-C(31)    | -78.9(3)  |
| C(4)-C(5)-C(6)-C(12)    | -174.6(3) |
| C(31)-C(5)-C(6)-C(12)   | -52.9(5)  |
| C(1)-C(5)-C(6)-C(12)    | 78.5(5)   |
| C(4)-C(5)-C(6)-C(7)     | -5.7(3)   |
| C(31)-C(5)-C(6)-C(7)    | 116.0(3)  |
| C(1)-C(5)-C(6)-C(7)     | -112.6(3) |
| C(12)-C(6)-C(7)-C(9)    | -3.0(5)   |
| C(5)-C(6)-C(7)-C(9)     | -173.6(3) |
| C(12)-C(6)-C(7)-C(8)    | 176.5(3)  |
| C(5)-C(6)-C(7)-C(8)     | 5.9(3)    |
| C(3)-C(4)-C(8)-C(7)     | 162.7(4)  |
| C(5)-C(4)-C(8)-C(7)     | -0.4(4)   |
| C(3)-C(4)-C(8)-C(35)    | -14.7(6)  |
| C(5)-C(4)-C(8)-C(35)    | -177.7(3) |
| C(9)-C(7)-C(8)-C(4)     | 175.9(4)  |
| C(6)-C(7)-C(8)-C(4)     | -3.5(4)   |
| C(9)-C(7)-C(8)-C(35)    | -6.6(5)   |
| C(6)-C(7)-C(8)-C(35)    | 173.9(3)  |
| C(6)-C(7)-C(9)-C(10)    | 1.5(5)    |
| C(8)-C(7)-C(9)-C(10)    | -177.9(3) |
| C(7)-C(9)-C(10)-C(11)   | -0.5(5)   |
| C(9)-C(10)-C(11)-C(12)  | 1.1(6)    |
| C(10)-C(11)-C(12)-C(6)  | -2.7(6)   |
| C(7)-C(6)-C(12)-C(11)   | 3.6(5)    |
| C(5)-C(6)-C(12)-C(11)   | 171.5(4)  |
| C(2)-C(1)-C(13)-C(14)   | -14.5(5)  |
| C(5)-C(1)-C(13)-C(14)   | 159.9(3)  |
| C(2)-C(1)-C(13)-C(20)   | 163.6(3)  |
| C(5)-C(1)-C(13)-C(20)   | -22.1(5)  |
| C(1)-C(13)-C(14)-C(19)  | 135.6(4)  |
| C(20)-C(13)-C(14)-C(19) | -42.6(4)  |
| C(1)-C(13)-C(14)-C(15)  | -49.2(5)  |
| C(20)-C(13)-C(14)-C(15) | 132.6(3)  |
| C(19)-C(14)-C(15)-C(16) | -1.1(6)   |
| C(13)-C(14)-C(15)-C(16) | -176.6(4) |
| C(14)-C(15)-C(16)-C(17) | -1.2(7)   |
| C(15)-C(16)-C(17)-C(18) | 2.1(7)    |
| C(16)-C(17)-C(18)-C(19) | -0.7(6)   |
| C(17)-C(18)-C(19)-C(14) | -1.7(6)   |
| C(15)-C(14)-C(19)-C(18) | 2.6(5)    |

|                         |            |
|-------------------------|------------|
| C(13)-C(14)-C(19)-C(18) | 178.0(3)   |
| C(1)-C(13)-C(20)-C(21)  | -67.0(4)   |
| C(14)-C(13)-C(20)-C(21) | 111.3(3)   |
| C(1)-C(13)-C(20)-C(25)  | 117.0(4)   |
| C(14)-C(13)-C(20)-C(25) | -64.8(4)   |
| C(25)-C(20)-C(21)-C(22) | -1.8(5)    |
| C(13)-C(20)-C(21)-C(22) | -178.1(3)  |
| C(20)-C(21)-C(22)-C(23) | -0.3(6)    |
| C(21)-C(22)-C(23)-C(24) | 1.1(7)     |
| C(22)-C(23)-C(24)-C(25) | 0.2(6)     |
| C(23)-C(24)-C(25)-C(20) | -2.4(6)    |
| C(21)-C(20)-C(25)-C(24) | 3.2(5)     |
| C(13)-C(20)-C(25)-C(24) | 179.3(3)   |
| C(1)-C(2)-C(26)-C(28)   | -2.5(7)    |
| C(3)-C(2)-C(26)-C(28)   | 165.1(4)   |
| C(1)-C(2)-C(26)-C(27)   | 177.4(4)   |
| C(3)-C(2)-C(26)-C(27)   | -15.0(7)   |
| C(6)-C(5)-C(31)-C(32)   | -46.8(5)   |
| C(4)-C(5)-C(31)-C(32)   | 66.7(5)    |
| C(1)-C(5)-C(31)-C(32)   | 174.0(4)   |
| C(33)-O(2)-C(32)-O(1)   | -6.9(9)    |
| C(33)-O(2)-C(32)-C(31)  | 175.5(5)   |
| C(5)-C(31)-C(32)-O(1)   | 111.1(5)   |
| C(5)-C(31)-C(32)-O(2)   | -71.2(6)   |
| C(32)-O(2)-C(33)-C(34') | -119.9(14) |
| C(32)-O(2)-C(33)-C(34)  | 179(2)     |
| C(4)-C(8)-C(35)-C(36)   | -54.8(5)   |
| C(7)-C(8)-C(35)-C(36)   | 128.2(4)   |
| C(4)-C(8)-C(35)-C(40)   | 125.1(4)   |
| C(7)-C(8)-C(35)-C(40)   | -51.9(5)   |
| C(40)-C(35)-C(36)-C(37) | -3.2(6)    |
| C(8)-C(35)-C(36)-C(37)  | 176.6(4)   |
| C(35)-C(36)-C(37)-C(38) | 1.3(7)     |
| C(36)-C(37)-C(38)-C(39) | 1.2(7)     |
| C(37)-C(38)-C(39)-C(40) | -1.7(7)    |
| C(38)-C(39)-C(40)-C(35) | -0.4(7)    |
| C(36)-C(35)-C(40)-C(39) | 2.8(6)     |
| C(8)-C(35)-C(40)-C(39)  | -177.1(4)  |

Symmetry transformations used to generate equivalent atoms:

Table 7. Hydrogen bonds for cd28246 [A and deg.].

| D-H...A | d(D-H) | d(H...A) | d(D...A) | <(DHA) |
|---------|--------|----------|----------|--------|
|---------|--------|----------|----------|--------|

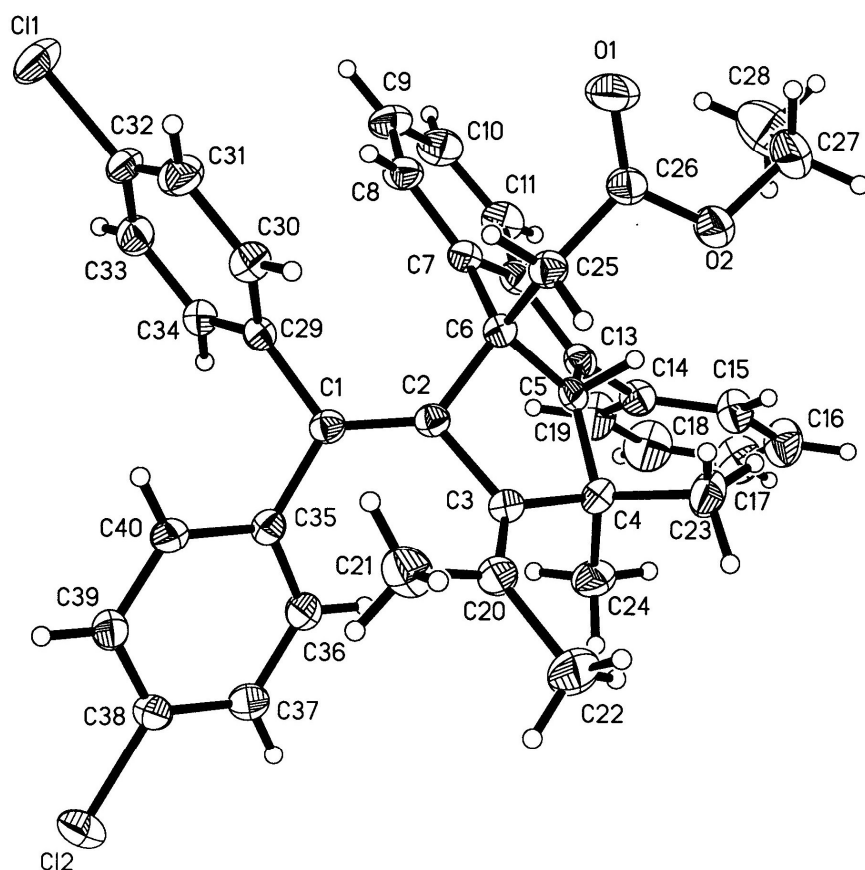

The crystal data of **4c** have been deposited in CCDC with number 700829. Empirical Formula:  $C_{41}H_{39}Cl_4O_2$ ; Formula Weight: 705.52; Crystal Color, Habit: colorless, prismatic; Crystal Dimensions: 0.465 x 0.414 x 0.270 mm; Crystal System: Monoclinic; Lattice Type: Primitive; Lattice Parameters:  $a = 11.0910(8)\text{\AA}$ ,  $b = 12.2148(8)\text{\AA}$ ,  $c = 27.0216(19)\text{\AA}$ ,  $\alpha = 90^\circ$ ,  $\beta = 99.3620(10)^\circ$ ,  $\gamma = 90^\circ$ ,  $V = 3612.0(4)\text{\AA}^3$ ; Space group:  $P2(1)/n$ ;  $Z = 4$ ;  $D_{calc} = 1.297\text{ g/cm}^3$ ;  $F_{000} = 1476$ ; Diffractometer: Rigaku AFC7R; Residuals:  $R$ ;  $R_w$ : 0.0602, 0.1556.

Table 1. Crystal data and structure refinement for cd28383.

|                                   |                                                                                                                            |
|-----------------------------------|----------------------------------------------------------------------------------------------------------------------------|
| Identification code               | cd28383                                                                                                                    |
| Empirical formula                 | C41 H39 Cl4 O2                                                                                                             |
| Formula weight                    | 705.52                                                                                                                     |
| Temperature                       | 293(2) K                                                                                                                   |
| Wavelength                        | 0.71073 Å                                                                                                                  |
| Crystal system, space group       | Monoclinic, P2(1)/n                                                                                                        |
| Unit cell dimensions              | a = 11.0910(8) Å    alpha = 90 deg.<br>b = 12.2148(8) Å    beta = 99.3620(10) deg.<br>c = 27.0216(19) Å    gamma = 90 deg. |
| Volume                            | 3612.0(4) Å <sup>3</sup>                                                                                                   |
| Z, Calculated density             | 4, 1.297 Mg/m <sup>3</sup>                                                                                                 |
| Absorption coefficient            | 0.362 mm <sup>-1</sup>                                                                                                     |
| F(000)                            | 1476                                                                                                                       |
| Crystal size                      | 0.465 x 0.414 x 0.270 mm                                                                                                   |
| Theta range for data collection   | 1.83 to 26.00 deg.                                                                                                         |
| Limiting indices                  | -11<=h<=13, -14<=k<=15, -33<=l<=25                                                                                         |
| Reflections collected / unique    | 19458 / 7099 [R(int) = 0.0362]                                                                                             |
| Completeness to theta = 26.00     | 100.0 %                                                                                                                    |
| Absorption correction             | Empirical                                                                                                                  |
| Max. and min. transmission        | 1.0000 and 0.7680                                                                                                          |
| Refinement method                 | Full-matrix least-squares on F <sup>2</sup>                                                                                |
| Data / restraints / parameters    | 7099 / 0 / 429                                                                                                             |
| Goodness-of-fit on F <sup>2</sup> | 0.983                                                                                                                      |
| Final R indices [I>2sigma(I)]     | R1 = 0.0602, wR2 = 0.1556                                                                                                  |
| R indices (all data)              | R1 = 0.0969, wR2 = 0.1737                                                                                                  |
| Largest diff. peak and hole       | 0.497 and -0.641 e.Å <sup>-3</sup>                                                                                         |

Table 2. Atomic coordinates ( $\times 10^4$ ) and equivalent isotropic displacement parameters ( $\text{\AA}^2 \times 10^3$ ) for cd28383. U(eq) is defined as one third of the trace of the orthogonalized Uij tensor.

|       | x        | y        | z       | U (eq) |
|-------|----------|----------|---------|--------|
| C1(1) | 4088(1)  | 3442(1)  | 3937(1) | 82(1)  |
| C1(2) | -1713(1) | 6396(1)  | 1104(1) | 71(1)  |
| C1(3) | 10364(2) | 701(3)   | 3670(1) | 229(1) |
| C1(4) | 9537(2)  | 1265(2)  | 2665(1) | 233(1) |
| O(1)  | 5380(2)  | -530(2)  | 2025(1) | 89(1)  |
| O(2)  | 5121(2)  | -348(2)  | 1202(1) | 61(1)  |
| C(1)  | 2303(2)  | 3129(2)  | 1725(1) | 34(1)  |
| C(2)  | 2689(2)  | 2389(2)  | 1417(1) | 33(1)  |
| C(3)  | 2070(2)  | 2076(2)  | 906(1)  | 39(1)  |
| C(4)  | 3062(2)  | 1921(2)  | 569(1)  | 42(1)  |
| C(5)  | 4205(2)  | 1982(2)  | 964(1)  | 35(1)  |
| C(6)  | 3923(2)  | 1784(2)  | 1490(1) | 34(1)  |
| C(7)  | 5066(2)  | 2226(2)  | 1816(1) | 36(1)  |
| C(8)  | 5433(2)  | 2228(2)  | 2327(1) | 44(1)  |
| C(9)  | 6567(3)  | 2644(3)  | 2524(1) | 56(1)  |
| C(10) | 7355(3)  | 3011(3)  | 2215(1) | 57(1)  |
| C(11) | 7037(3)  | 2953(2)  | 1702(1) | 51(1)  |
| C(12) | 5883(2)  | 2561(2)  | 1500(1) | 38(1)  |
| C(13) | 5319(2)  | 2415(2)  | 973(1)  | 38(1)  |
| C(14) | 5947(3)  | 2727(2)  | 552(1)  | 43(1)  |
| C(15) | 6087(3)  | 1994(2)  | 176(1)  | 52(1)  |
| C(16) | 6686(3)  | 2281(3)  | -214(1) | 68(1)  |
| C(17) | 7168(4)  | 3304(3)  | -234(2) | 75(1)  |
| C(18) | 7067(4)  | 4037(3)  | 136(2)  | 81(1)  |
| C(19) | 6450(3)  | 3758(3)  | 531(1)  | 66(1)  |
| C(20) | 870(3)   | 1869(2)  | 778(1)  | 48(1)  |
| C(21) | -4(3)    | 1859(3)  | 1145(1) | 62(1)  |
| C(22) | 247(3)   | 1615(3)  | 251(1)  | 78(1)  |
| C(23) | 2988(3)  | 801(3)   | 292(1)  | 62(1)  |
| C(24) | 3035(3)  | 2864(3)  | 192(1)  | 60(1)  |
| C(25) | 3723(2)  | 563(2)   | 1625(1) | 40(1)  |
| C(26) | 4821(3)  | -158(2)  | 1648(1) | 45(1)  |
| C(27) | 6204(4)  | -1019(3) | 1187(2) | 77(1)  |
| C(28) | 7308(4)  | -354(4)  | 1259(2) | 108(2) |
| C(29) | 2807(2)  | 3194(2)  | 2270(1) | 35(1)  |
| C(30) | 2616(3)  | 2343(2)  | 2589(1) | 46(1)  |
| C(31) | 3001(3)  | 2403(3)  | 3098(1) | 54(1)  |
| C(32) | 3604(3)  | 3332(3)  | 3290(1) | 50(1)  |
| C(33) | 3806(3)  | 4185(3)  | 2989(1) | 50(1)  |
| C(34) | 3394(2)  | 4119(2)  | 2480(1) | 41(1)  |
| C(35) | 1307(2)  | 3941(2)  | 1562(1) | 35(1)  |
| C(36) | 1187(3)  | 4480(2)  | 1103(1) | 44(1)  |
| C(37) | 268(3)   | 5227(2)  | 963(1)  | 49(1)  |
| C(38) | -541(2)  | 5459(2)  | 1285(1) | 44(1)  |
| C(39) | -432(2)  | 4973(2)  | 1744(1) | 43(1)  |
| C(40) | 496(2)   | 4215(2)  | 1881(1) | 40(1)  |
| C(41) | 9293(6)  | 497(5)   | 3155(3) | 192(4) |

Table 3. Bond lengths [Å] and angles [deg] for cd28383.

|              |          |
|--------------|----------|
| C1(1)-C(32)  | 1.749(3) |
| C1(2)-C(38)  | 1.741(3) |
| C1(3)-C(41)  | 1.695(9) |
| C1(4)-C(41)  | 1.679(8) |
| O(1)-C(26)   | 1.193(3) |
| O(2)-C(26)   | 1.320(3) |
| O(2)-C(27)   | 1.460(4) |
| C(1)-C(2)    | 1.343(3) |
| C(1)-C(29)   | 1.491(3) |
| C(1)-C(35)   | 1.497(3) |
| C(2)-C(3)    | 1.489(3) |
| C(2)-C(6)    | 1.540(3) |
| C(3)-C(20)   | 1.343(4) |
| C(3)-C(4)    | 1.551(4) |
| C(4)-C(5)    | 1.520(4) |
| C(4)-C(24)   | 1.535(4) |
| C(4)-C(23)   | 1.554(4) |
| C(5)-C(13)   | 1.340(4) |
| C(5)-C(6)    | 1.524(3) |
| C(5)-H(5)    | 0.9800   |
| C(6)-C(7)    | 1.520(3) |
| C(6)-C(25)   | 1.559(4) |
| C(7)-C(8)    | 1.374(4) |
| C(7)-C(12)   | 1.404(4) |
| C(8)-C(9)    | 1.380(4) |
| C(8)-H(8)    | 0.9300   |
| C(9)-C(10)   | 1.379(4) |
| C(9)-H(9)    | 0.9300   |
| C(10)-C(11)  | 1.374(4) |
| C(10)-H(10)  | 0.9300   |
| C(11)-C(12)  | 1.393(4) |
| C(11)-H(11)  | 0.9300   |
| C(12)-C(13)  | 1.468(4) |
| C(13)-C(14)  | 1.478(4) |
| C(14)-C(19)  | 1.382(4) |
| C(14)-C(15)  | 1.383(4) |
| C(15)-C(16)  | 1.378(4) |
| C(15)-H(15)  | 0.9300   |
| C(16)-C(17)  | 1.364(5) |
| C(16)-H(16)  | 0.9300   |
| C(17)-C(18)  | 1.360(5) |
| C(17)-H(17)  | 0.9300   |
| C(18)-C(19)  | 1.400(5) |
| C(18)-H(18)  | 0.9300   |
| C(19)-H(19)  | 0.9300   |
| C(20)-C(21)  | 1.497(4) |
| C(20)-C(22)  | 1.509(4) |
| C(21)-H(21A) | 0.9600   |
| C(21)-H(21B) | 0.9600   |
| C(21)-H(21C) | 0.9600   |
| C(22)-H(22A) | 0.9600   |
| C(22)-H(22B) | 0.9600   |
| C(22)-H(22C) | 0.9600   |
| C(23)-H(23A) | 0.9600   |
| C(23)-H(23B) | 0.9600   |
| C(23)-H(23C) | 0.9600   |
| C(24)-H(24A) | 0.9600   |
| C(24)-H(24B) | 0.9600   |
| C(24)-H(24C) | 0.9600   |
| C(25)-C(26)  | 1.497(4) |
| C(25)-H(25A) | 0.9700   |
| C(25)-H(25B) | 0.9700   |
| C(27)-C(28)  | 1.456(6) |
| C(27)-H(27A) | 0.9700   |
| C(27)-H(27B) | 0.9700   |
| C(28)-H(28A) | 0.9600   |
| C(28)-H(28B) | 0.9600   |
| C(28)-H(28C) | 0.9600   |

|                   |            |
|-------------------|------------|
| C(29)-C(34)       | 1.380(4)   |
| C(29)-C(30)       | 1.388(4)   |
| C(30)-C(31)       | 1.374(4)   |
| C(30)-H(30)       | 0.9300     |
| C(31)-C(32)       | 1.375(4)   |
| C(31)-H(31)       | 0.9300     |
| C(32)-C(33)       | 1.363(4)   |
| C(33)-C(34)       | 1.379(4)   |
| C(33)-H(33)       | 0.9300     |
| C(34)-H(34)       | 0.9300     |
| C(35)-C(40)       | 1.384(4)   |
| C(35)-C(36)       | 1.392(4)   |
| C(36)-C(37)       | 1.374(4)   |
| C(36)-H(36)       | 0.9300     |
| C(37)-C(38)       | 1.377(4)   |
| C(37)-H(37)       | 0.9300     |
| C(38)-C(39)       | 1.363(4)   |
| C(39)-C(40)       | 1.389(4)   |
| C(39)-H(39)       | 0.9300     |
| C(40)-H(40)       | 0.9300     |
| C(41)-H(41A)      | 0.9700     |
| C(41)-H(41B)      | 0.9700     |
|                   |            |
| C(26)-O(2)-C(27)  | 117.1(2)   |
| C(2)-C(1)-C(29)   | 122.7(2)   |
| C(2)-C(1)-C(35)   | 123.9(2)   |
| C(29)-C(1)-C(35)  | 113.3(2)   |
| C(1)-C(2)-C(3)    | 126.9(2)   |
| C(1)-C(2)-C(6)    | 127.6(2)   |
| C(3)-C(2)-C(6)    | 105.2(2)   |
| C(20)-C(3)-C(2)   | 125.2(2)   |
| C(20)-C(3)-C(4)   | 126.4(2)   |
| C(2)-C(3)-C(4)    | 108.2(2)   |
| C(5)-C(4)-C(24)   | 110.7(2)   |
| C(5)-C(4)-C(3)    | 99.9(2)    |
| C(24)-C(4)-C(3)   | 111.1(2)   |
| C(5)-C(4)-C(23)   | 110.7(2)   |
| C(24)-C(4)-C(23)  | 110.3(2)   |
| C(3)-C(4)-C(23)   | 113.8(2)   |
| C(13)-C(5)-C(4)   | 133.9(2)   |
| C(13)-C(5)-C(6)   | 111.9(2)   |
| C(4)-C(5)-C(6)    | 111.9(2)   |
| C(13)-C(5)-H(5)   | 94.9       |
| C(4)-C(5)-H(5)    | 94.9       |
| C(6)-C(5)-H(5)    | 94.9       |
| C(7)-C(6)-C(5)    | 101.9(2)   |
| C(7)-C(6)-C(2)    | 122.9(2)   |
| C(5)-C(6)-C(2)    | 96.78(19)  |
| C(7)-C(6)-C(25)   | 109.9(2)   |
| C(5)-C(6)-C(25)   | 115.4(2)   |
| C(2)-C(6)-C(25)   | 109.35(19) |
| C(8)-C(7)-C(12)   | 119.7(2)   |
| C(8)-C(7)-C(6)    | 131.7(2)   |
| C(12)-C(7)-C(6)   | 108.1(2)   |
| C(7)-C(8)-C(9)    | 119.4(3)   |
| C(7)-C(8)-H(8)    | 120.3      |
| C(9)-C(8)-H(8)    | 120.3      |
| C(10)-C(9)-C(8)   | 120.9(3)   |
| C(10)-C(9)-H(9)   | 119.6      |
| C(8)-C(9)-H(9)    | 119.6      |
| C(11)-C(10)-C(9)  | 120.6(3)   |
| C(11)-C(10)-H(10) | 119.7      |
| C(9)-C(10)-H(10)  | 119.7      |
| C(10)-C(11)-C(12) | 118.9(3)   |
| C(10)-C(11)-H(11) | 120.6      |
| C(12)-C(11)-H(11) | 120.6      |
| C(11)-C(12)-C(7)  | 120.3(3)   |
| C(11)-C(12)-C(13) | 129.9(3)   |
| C(7)-C(12)-C(13)  | 109.8(2)   |
| C(5)-C(13)-C(12)  | 108.2(2)   |
| C(5)-C(13)-C(14)  | 129.4(2)   |
| C(12)-C(13)-C(14) | 122.4(2)   |

|                     |          |
|---------------------|----------|
| C(19)-C(14)-C(15)   | 117.7(3) |
| C(19)-C(14)-C(13)   | 120.7(3) |
| C(15)-C(14)-C(13)   | 121.5(2) |
| C(16)-C(15)-C(14)   | 121.5(3) |
| C(16)-C(15)-H(15)   | 119.2    |
| C(14)-C(15)-H(15)   | 119.3    |
| C(17)-C(16)-C(15)   | 120.3(3) |
| C(17)-C(16)-H(16)   | 119.9    |
| C(15)-C(16)-H(16)   | 119.9    |
| C(18)-C(17)-C(16)   | 119.6(3) |
| C(18)-C(17)-H(17)   | 120.2    |
| C(16)-C(17)-H(17)   | 120.2    |
| C(17)-C(18)-C(19)   | 120.6(3) |
| C(17)-C(18)-H(18)   | 119.7    |
| C(19)-C(18)-H(18)   | 119.7    |
| C(14)-C(19)-C(18)   | 120.3(3) |
| C(14)-C(19)-H(19)   | 119.9    |
| C(18)-C(19)-H(19)   | 119.9    |
| C(3)-C(20)-C(21)    | 123.5(3) |
| C(3)-C(20)-C(22)    | 124.3(3) |
| C(21)-C(20)-C(22)   | 112.2(3) |
| C(20)-C(21)-H(21A)  | 109.5    |
| C(20)-C(21)-H(21B)  | 109.5    |
| H(21A)-C(21)-H(21B) | 109.5    |
| C(20)-C(21)-H(21C)  | 109.5    |
| H(21A)-C(21)-H(21C) | 109.5    |
| H(21B)-C(21)-H(21C) | 109.5    |
| C(20)-C(22)-H(22A)  | 109.5    |
| C(20)-C(22)-H(22B)  | 109.5    |
| H(22A)-C(22)-H(22B) | 109.5    |
| C(20)-C(22)-H(22C)  | 109.5    |
| H(22A)-C(22)-H(22C) | 109.5    |
| H(22B)-C(22)-H(22C) | 109.5    |
| C(4)-C(23)-H(23A)   | 109.5    |
| C(4)-C(23)-H(23B)   | 109.5    |
| H(23A)-C(23)-H(23B) | 109.5    |
| C(4)-C(23)-H(23C)   | 109.5    |
| H(23A)-C(23)-H(23C) | 109.5    |
| H(23B)-C(23)-H(23C) | 109.5    |
| C(4)-C(24)-H(24A)   | 109.5    |
| C(4)-C(24)-H(24B)   | 109.5    |
| H(24A)-C(24)-H(24B) | 109.5    |
| C(4)-C(24)-H(24C)   | 109.5    |
| H(24A)-C(24)-H(24C) | 109.5    |
| H(24B)-C(24)-H(24C) | 109.5    |
| C(26)-C(25)-C(6)    | 115.2(2) |
| C(26)-C(25)-H(25A)  | 108.5    |
| C(6)-C(25)-H(25A)   | 108.5    |
| C(26)-C(25)-H(25B)  | 108.5    |
| C(6)-C(25)-H(25B)   | 108.5    |
| H(25A)-C(25)-H(25B) | 107.5    |
| O(1)-C(26)-O(2)     | 122.6(3) |
| O(1)-C(26)-C(25)    | 124.4(3) |
| O(2)-C(26)-C(25)    | 113.0(2) |
| C(28)-C(27)-O(2)    | 111.2(3) |
| C(28)-C(27)-H(27A)  | 109.4    |
| O(2)-C(27)-H(27A)   | 109.4    |
| C(28)-C(27)-H(27B)  | 109.4    |
| O(2)-C(27)-H(27B)   | 109.4    |
| H(27A)-C(27)-H(27B) | 108.0    |
| C(27)-C(28)-H(28A)  | 109.5    |
| C(27)-C(28)-H(28B)  | 109.5    |
| H(28A)-C(28)-H(28B) | 109.5    |
| C(27)-C(28)-H(28C)  | 109.5    |
| H(28A)-C(28)-H(28C) | 109.5    |
| H(28B)-C(28)-H(28C) | 109.5    |
| C(34)-C(29)-C(30)   | 117.8(2) |
| C(34)-C(29)-C(1)    | 121.8(2) |
| C(30)-C(29)-C(1)    | 120.2(2) |
| C(31)-C(30)-C(29)   | 121.9(3) |
| C(31)-C(30)-H(30)   | 119.1    |
| C(29)-C(30)-H(30)   | 119.1    |



|                        |           |
|------------------------|-----------|
| C (30)-C (31)-C (32)   | 118.4 (3) |
| C (30)-C (31)-H (31)   | 120.8     |
| C (32)-C (31)-H (31)   | 120.8     |
| C (33)-C (32)-C (31)   | 121.5 (3) |
| C (33)-C (32)-Cl (1)   | 119.0 (2) |
| C (31)-C (32)-Cl (1)   | 119.5 (2) |
| C (32)-C (33)-C (34)   | 119.4 (3) |
| C (32)-C (33)-H (33)   | 120.3     |
| C (34)-C (33)-H (33)   | 120.3     |
| C (33)-C (34)-C (29)   | 121.0 (3) |
| C (33)-C (34)-H (34)   | 119.5     |
| C (29)-C (34)-H (34)   | 119.5     |
| C (40)-C (35)-C (36)   | 117.6 (2) |
| C (40)-C (35)-C (1)    | 120.0 (2) |
| C (36)-C (35)-C (1)    | 122.3 (2) |
| C (37)-C (36)-C (35)   | 121.2 (3) |
| C (37)-C (36)-H (36)   | 119.4     |
| C (35)-C (36)-H (36)   | 119.4     |
| C (36)-C (37)-C (38)   | 119.6 (3) |
| C (36)-C (37)-H (37)   | 120.2     |
| C (38)-C (37)-H (37)   | 120.2     |
| C (39)-C (38)-C (37)   | 121.0 (3) |
| C (39)-C (38)-Cl (2)   | 119.5 (2) |
| C (37)-C (38)-Cl (2)   | 119.5 (2) |
| C (38)-C (39)-C (40)   | 119.0 (3) |
| C (38)-C (39)-H (39)   | 120.5     |
| C (40)-C (39)-H (39)   | 120.5     |
| C (35)-C (40)-C (39)   | 121.5 (3) |
| C (35)-C (40)-H (40)   | 119.2     |
| C (39)-C (40)-H (40)   | 119.2     |
| Cl (4)-C (41)-Cl (3)   | 112.6 (3) |
| Cl (4)-C (41)-H (41A)  | 109.1     |
| Cl (3)-C (41)-H (41A)  | 109.1     |
| Cl (4)-C (41)-H (41B)  | 109.1     |
| Cl (3)-C (41)-H (41B)  | 109.1     |
| H (41A)-C (41)-H (41B) | 107.8     |

---

Symmetry transformations used to generate equivalent atoms:

Table 4. Anisotropic displacement parameters ( $\text{\AA}^2 \times 10^3$ ) for cd28383.  
 The anisotropic displacement factor exponent takes the form:  
 $-2 \pi^2 [ h^2 a^{*2} U_{11} + \dots + 2 h k a^* b^* U_{12} ]$

|       | U11    | U22    | U33     | U23    | U13    | U12     |
|-------|--------|--------|---------|--------|--------|---------|
| C1(1) | 88(1)  | 125(1) | 31(1)   | -7(1)  | -2(1)  | 16(1)   |
| C1(2) | 66(1)  | 75(1)  | 70(1)   | 12(1)  | 3(1)   | 34(1)   |
| C1(3) | 176(2) | 311(3) | 202(2)  | -56(2) | 37(2)  | -107(2) |
| C1(4) | 147(2) | 172(2) | 387(4)  | 114(2) | 69(2)  | 95(1)   |
| O(1)  | 102(2) | 112(2) | 54(2)   | 30(1)  | 17(1)  | 58(2)   |
| O(2)  | 66(1)  | 70(2)  | 51(1)   | 3(1)   | 16(1)  | 26(1)   |
| C(1)  | 33(1)  | 37(1)  | 32(1)   | 3(1)   | 6(1)   | -1(1)   |
| C(2)  | 30(1)  | 36(1)  | 32(1)   | 2(1)   | 5(1)   | -1(1)   |
| C(3)  | 40(2)  | 41(2)  | 33(2)   | 0(1)   | 1(1)   | 6(1)    |
| C(4)  | 48(2)  | 47(2)  | 30(2)   | -5(1)  | 3(1)   | 4(1)    |
| C(5)  | 44(2)  | 24(1)  | 36(1)   | -1(1)  | 7(1)   | 7(1)    |
| C(6)  | 33(1)  | 34(1)  | 33(1)   | 0(1)   | 4(1)   | 0(1)    |
| C(7)  | 34(1)  | 37(1)  | 37(2)   | 2(1)   | 3(1)   | 4(1)    |
| C(8)  | 36(2)  | 54(2)  | 40(2)   | 6(1)   | 2(1)   | 5(1)    |
| C(9)  | 46(2)  | 73(2)  | 44(2)   | 0(2)   | -10(1) | 8(2)    |
| C(10) | 37(2)  | 65(2)  | 65(2)   | 1(2)   | -6(2)  | -5(1)   |
| C(11) | 37(2)  | 52(2)  | 63(2)   | 5(2)   | 7(1)   | -9(1)   |
| C(12) | 39(2)  | 32(1)  | 43(2)   | 1(1)   | 6(1)   | 1(1)    |
| C(13) | 44(2)  | 30(1)  | 42(2)   | 3(1)   | 11(1)  | 3(1)    |
| C(14) | 46(2)  | 40(2)  | 45(2)   | 6(1)   | 12(1)  | -1(1)   |
| C(15) | 62(2)  | 46(2)  | 54(2)   | 3(1)   | 27(2)  | -2(2)   |
| C(16) | 80(2)  | 72(2)  | 60(2)   | 0(2)   | 35(2)  | 1(2)    |
| C(17) | 84(3)  | 84(3)  | 65(2)   | 17(2)  | 39(2)  | -7(2)   |
| C(18) | 105(3) | 62(2)  | 81(3)   | 17(2)  | 33(2)  | -22(2)  |
| C(19) | 93(3)  | 48(2)  | 62(2)   | 4(2)   | 30(2)  | -11(2)  |
| C(20) | 41(2)  | 50(2)  | 48(2)   | -10(1) | -4(1)  | 3(1)    |
| C(21) | 39(2)  | 62(2)  | 82(2)   | -10(2) | 5(2)   | -7(2)   |
| C(22) | 56(2)  | 100(3) | 69(3)   | -26(2) | -18(2) | 1(2)    |
| C(23) | 64(2)  | 70(2)  | 50(2)   | -25(2) | 1(2)   | 3(2)    |
| C(24) | 66(2)  | 75(2)  | 38(2)   | 13(2)  | 8(2)   | 14(2)   |
| C(25) | 42(2)  | 42(2)  | 37(2)   | 4(1)   | 8(1)   | -1(1)   |
| C(26) | 54(2)  | 41(2)  | 41(2)   | 8(1)   | 10(1)  | 4(1)    |
| C(27) | 83(3)  | 77(3)  | 75(3)   | -4(2)  | 24(2)  | 33(2)   |
| C(28) | 67(3)  | 106(4) | 156(5)  | 20(3)  | 34(3)  | 20(3)   |
| C(29) | 30(1)  | 40(2)  | 35(1)   | -1(1)  | 6(1)   | 5(1)    |
| C(30) | 46(2)  | 49(2)  | 42(2)   | 1(1)   | 7(1)   | -2(1)   |
| C(31) | 55(2)  | 68(2)  | 39(2)   | 10(2)  | 11(1)  | 3(2)    |
| C(32) | 44(2)  | 78(2)  | 27(2)   | -4(2)  | 1(1)   | 16(2)   |
| C(33) | 46(2)  | 56(2)  | 47(2)   | -12(2) | 1(1)   | 4(1)    |
| C(34) | 43(2)  | 41(2)  | 38(2)   | -4(1)  | 5(1)   | 5(1)    |
| C(35) | 36(1)  | 38(1)  | 33(1)   | -2(1)  | 5(1)   | -3(1)   |
| C(36) | 47(2)  | 47(2)  | 38(2)   | 3(1)   | 10(1)  | 6(1)    |
| C(37) | 59(2)  | 49(2)  | 39(2)   | 10(1)  | 6(1)   | 9(1)    |
| C(38) | 42(2)  | 44(2)  | 45(2)   | -1(1)  | 0(1)   | 8(1)    |
| C(39) | 41(2)  | 48(2)  | 42(2)   | -5(1)  | 8(1)   | 3(1)    |
| C(40) | 41(2)  | 45(2)  | 33(1)   | 4(1)   | 4(1)   | 3(1)    |
| C(41) | 137(5) | 129(5) | 348(11) | -20(6) | 157(7) | -55(4)  |

Table 5. Hydrogen coordinates ( $\times 10^4$ ) and isotropic displacement parameters ( $\text{\AA}^2 \times 10^3$ ) for cd28383.

|        | x    | y     | z    | U (eq) |
|--------|------|-------|------|--------|
| H(5)   | 4462 | 1228  | 914  | 42     |
| H(8)   | 4922 | 1952  | 2538 | 53     |
| H(9)   | 6802 | 2676  | 2870 | 67     |
| H(10)  | 8109 | 3301  | 2355 | 69     |
| H(11)  | 7583 | 3171  | 1494 | 61     |
| H(15)  | 5770 | 1291  | 186  | 63     |
| H(16)  | 6762 | 1775  | -464 | 82     |
| H(17)  | 7563 | 3500  | -499 | 90     |
| H(18)  | 7412 | 4729  | 127  | 97     |
| H(19)  | 6378 | 4268  | 780  | 79     |
| H(21A) | 445  | 1859  | 1481 | 92     |
| H(21B) | -504 | 1214  | 1095 | 92     |
| H(21C) | -514 | 2497  | 1096 | 92     |
| H(22A) | 790  | 1783  | 19   | 117    |
| H(22B) | -481 | 2048  | 174  | 117    |
| H(22C) | 37   | 852   | 227  | 117    |
| H(23A) | 3764 | 639   | 195  | 93     |
| H(23B) | 2371 | 836   | -1   | 93     |
| H(23C) | 2784 | 237   | 512  | 93     |
| H(24A) | 3206 | 3541  | 369  | 90     |
| H(24B) | 2241 | 2901  | -12  | 90     |
| H(24C) | 3641 | 2738  | -19  | 90     |
| H(25A) | 3450 | 539   | 1948 | 48     |
| H(25B) | 3072 | 265   | 1379 | 48     |
| H(27A) | 6267 | -1572 | 1447 | 92     |
| H(27B) | 6124 | -1390 | 866  | 92     |
| H(28A) | 7260 | 175   | 993  | 162    |
| H(28B) | 8006 | -816  | 1255 | 162    |
| H(28C) | 7384 | 18    | 1575 | 162    |
| H(30)  | 2217 | 1715  | 2454 | 55     |
| H(31)  | 2857 | 1830  | 3307 | 64     |
| H(33)  | 4219 | 4805  | 3125 | 60     |
| H(34)  | 3512 | 4709  | 2276 | 49     |
| H(36)  | 1738 | 4332  | 886  | 53     |
| H(37)  | 194  | 5574  | 653  | 59     |
| H(39)  | -971 | 5145  | 1962 | 52     |
| H(40)  | 575  | 3884  | 2194 | 48     |
| H(41A) | 9293 | -269  | 3061 | 230    |
| H(41B) | 8494 | 669   | 3236 | 230    |

Table 6. Torsion angles [deg] for cd28383.

|                         |           |
|-------------------------|-----------|
| C(29)-C(1)-C(2)-C(3)    | 164.5(2)  |
| C(35)-C(1)-C(2)-C(3)    | -13.5(4)  |
| C(29)-C(1)-C(2)-C(6)    | -23.1(4)  |
| C(35)-C(1)-C(2)-C(6)    | 158.9(2)  |
| C(1)-C(2)-C(3)-C(20)    | -45.2(4)  |
| C(6)-C(2)-C(3)-C(20)    | 141.1(3)  |
| C(1)-C(2)-C(3)-C(4)     | 140.5(3)  |
| C(6)-C(2)-C(3)-C(4)     | -33.3(3)  |
| C(20)-C(3)-C(4)-C(5)    | -165.0(3) |
| C(2)-C(3)-C(4)-C(5)     | 9.3(3)    |
| C(20)-C(3)-C(4)-C(24)   | 78.1(4)   |
| C(2)-C(3)-C(4)-C(24)    | -107.6(2) |
| C(20)-C(3)-C(4)-C(23)   | -47.0(4)  |
| C(2)-C(3)-C(4)-C(23)    | 127.3(2)  |
| C(24)-C(4)-C(5)-C(13)   | -25.2(4)  |
| C(3)-C(4)-C(5)-C(13)    | -142.3(3) |
| C(23)-C(4)-C(5)-C(13)   | 97.5(3)   |
| C(24)-C(4)-C(5)-C(6)    | 135.8(2)  |
| C(3)-C(4)-C(5)-C(6)     | 18.7(3)   |
| C(23)-C(4)-C(5)-C(6)    | -101.6(3) |
| C(13)-C(5)-C(6)-C(7)    | 2.2(3)    |
| C(4)-C(5)-C(6)-C(7)     | -163.1(2) |
| C(13)-C(5)-C(6)-C(2)    | 127.9(2)  |
| C(4)-C(5)-C(6)-C(2)     | -37.4(2)  |
| C(13)-C(5)-C(6)-C(25)   | -116.9(2) |
| C(4)-C(5)-C(6)-C(25)    | 77.8(3)   |
| C(1)-C(2)-C(6)-C(7)     | -23.6(4)  |
| C(3)-C(2)-C(6)-C(7)     | 150.0(2)  |
| C(1)-C(2)-C(6)-C(5)     | -132.5(3) |
| C(3)-C(2)-C(6)-C(5)     | 41.2(2)   |
| C(1)-C(2)-C(6)-C(25)    | 107.5(3)  |
| C(3)-C(2)-C(6)-C(25)    | -78.8(2)  |
| C(5)-C(6)-C(7)-C(8)     | -175.1(3) |
| C(2)-C(6)-C(7)-C(8)     | 78.7(4)   |
| C(25)-C(6)-C(7)-C(8)    | -52.2(4)  |
| C(5)-C(6)-C(7)-C(12)    | -2.9(3)   |
| C(2)-C(6)-C(7)-C(12)    | -109.2(3) |
| C(25)-C(6)-C(7)-C(12)   | 120.0(2)  |
| C(12)-C(7)-C(8)-C(9)    | 5.2(4)    |
| C(6)-C(7)-C(8)-C(9)     | 176.6(3)  |
| C(7)-C(8)-C(9)-C(10)    | -2.9(4)   |
| C(8)-C(9)-C(10)-C(11)   | -1.2(5)   |
| C(9)-C(10)-C(11)-C(12)  | 2.8(5)    |
| C(10)-C(11)-C(12)-C(7)  | -0.4(4)   |
| C(10)-C(11)-C(12)-C(13) | -179.9(3) |
| C(8)-C(7)-C(12)-C(11)   | -3.6(4)   |
| C(6)-C(7)-C(12)-C(11)   | -176.8(2) |
| C(8)-C(7)-C(12)-C(13)   | 176.0(2)  |
| C(6)-C(7)-C(12)-C(13)   | 2.8(3)    |
| C(4)-C(5)-C(13)-C(12)   | 160.3(3)  |
| C(6)-C(5)-C(13)-C(12)   | -0.7(3)   |
| C(4)-C(5)-C(13)-C(14)   | -19.3(5)  |
| C(6)-C(5)-C(13)-C(14)   | 179.8(2)  |
| C(11)-C(12)-C(13)-C(5)  | 178.2(3)  |
| C(7)-C(12)-C(13)-C(5)   | -1.3(3)   |
| C(11)-C(12)-C(13)-C(14) | -2.2(4)   |
| C(7)-C(12)-C(13)-C(14)  | 178.3(2)  |
| C(5)-C(13)-C(14)-C(19)  | 128.3(3)  |
| C(12)-C(13)-C(14)-C(19) | -51.2(4)  |
| C(5)-C(13)-C(14)-C(15)  | -53.8(4)  |
| C(12)-C(13)-C(14)-C(15) | 126.7(3)  |
| C(19)-C(14)-C(15)-C(16) | -1.2(5)   |
| C(13)-C(14)-C(15)-C(16) | -179.2(3) |
| C(14)-C(15)-C(16)-C(17) | 0.5(5)    |
| C(15)-C(16)-C(17)-C(18) | 0.8(6)    |
| C(16)-C(17)-C(18)-C(19) | -1.5(6)   |
| C(15)-C(14)-C(19)-C(18) | 0.5(5)    |
| C(13)-C(14)-C(19)-C(18) | 178.5(3)  |

---

|                         |           |
|-------------------------|-----------|
| C(17)-C(18)-C(19)-C(14) | 0.8(6)    |
| C(2)-C(3)-C(20)-C(21)   | -3.8(5)   |
| C(4)-C(3)-C(20)-C(21)   | 169.5(3)  |
| C(2)-C(3)-C(20)-C(22)   | 176.4(3)  |
| C(4)-C(3)-C(20)-C(22)   | -10.3(5)  |
| C(7)-C(6)-C(25)-C(26)   | -49.1(3)  |
| C(5)-C(6)-C(25)-C(26)   | 65.4(3)   |
| C(2)-C(6)-C(25)-C(26)   | 173.1(2)  |
| C(27)-O(2)-C(26)-O(1)   | -1.8(5)   |
| C(27)-O(2)-C(26)-C(25)  | 178.3(3)  |
| C(6)-C(25)-C(26)-O(1)   | 109.5(3)  |
| C(6)-C(25)-C(26)-O(2)   | -70.5(3)  |
| C(26)-O(2)-C(27)-C(28)  | -86.3(4)  |
| C(2)-C(1)-C(29)-C(34)   | 118.8(3)  |
| C(35)-C(1)-C(29)-C(34)  | -63.0(3)  |
| C(2)-C(1)-C(29)-C(30)   | -66.0(3)  |
| C(35)-C(1)-C(29)-C(30)  | 112.2(3)  |
| C(34)-C(29)-C(30)-C(31) | -0.5(4)   |
| C(1)-C(29)-C(30)-C(31)  | -175.9(3) |
| C(29)-C(30)-C(31)-C(32) | -0.8(4)   |
| C(30)-C(31)-C(32)-C(33) | 0.9(5)    |
| C(30)-C(31)-C(32)-C1(1) | 179.2(2)  |
| C(31)-C(32)-C(33)-C(34) | 0.3(4)    |
| C1(1)-C(32)-C(33)-C(34) | -178.0(2) |
| C(32)-C(33)-C(34)-C(29) | -1.7(4)   |
| C(30)-C(29)-C(34)-C(33) | 1.7(4)    |
| C(1)-C(29)-C(34)-C(33)  | 177.1(2)  |
| C(2)-C(1)-C(35)-C(40)   | 142.9(3)  |
| C(29)-C(1)-C(35)-C(40)  | -35.3(3)  |
| C(2)-C(1)-C(35)-C(36)   | -40.0(4)  |
| C(29)-C(1)-C(35)-C(36)  | 141.9(3)  |
| C(40)-C(35)-C(36)-C(37) | -2.4(4)   |
| C(1)-C(35)-C(36)-C(37)  | -179.6(3) |
| C(35)-C(36)-C(37)-C(38) | 0.8(4)    |
| C(36)-C(37)-C(38)-C(39) | 1.2(4)    |
| C(36)-C(37)-C(38)-C1(2) | -179.3(2) |
| C(37)-C(38)-C(39)-C(40) | -1.4(4)   |
| C1(2)-C(38)-C(39)-C(40) | 179.1(2)  |
| C(36)-C(35)-C(40)-C(39) | 2.1(4)    |
| C(1)-C(35)-C(40)-C(39)  | 179.4(2)  |
| C(38)-C(39)-C(40)-C(35) | -0.3(4)   |

---

Symmetry transformations used to generate equivalent atoms:

Table 7. Hydrogen bonds for cd28383 [A and deg.].

---

| D-H...A | d(D-H) | d(H...A) | d(D...A) | <(DHA) |
|---------|--------|----------|----------|--------|
|---------|--------|----------|----------|--------|

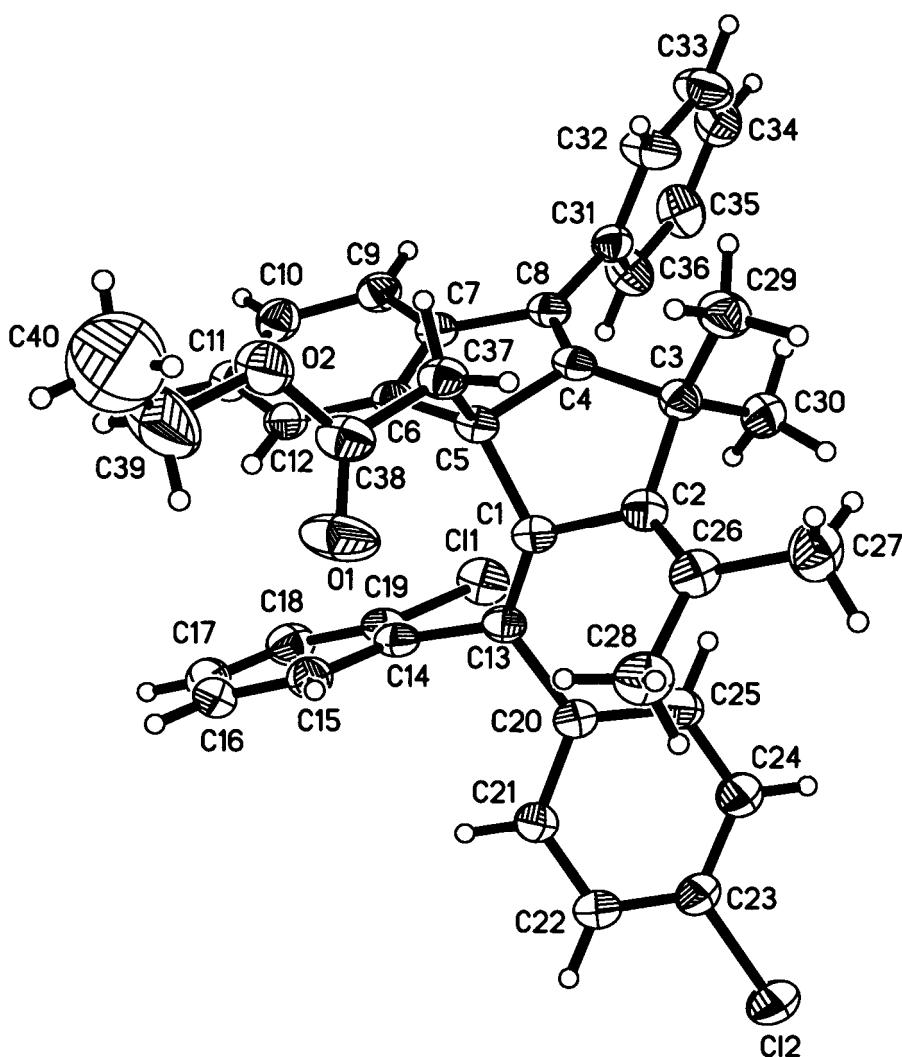

The crystal data of **4e** have been deposited in CCDC with number 719328. Empirical Formula:  $C_{43}H_{42}Cl_2O_2$ ; Formula Weight: 661.67; Crystal Color, Habit: colorless, prismatic; Crystal Dimensions: 0.471 x 0.425 x 0.360 mm; Crystal System: Triclinic; Lattice Type: Primitive; Lattice Parameters:  $a = 9.7469(12)\text{\AA}$ ,  $b = 11.6130(14)\text{\AA}$ ,  $c = 15.7201(18)\text{\AA}$ ,  $\alpha = 90.102(2)^\circ$ ,  $\beta = 93.697(3)^\circ$ ,  $\gamma = 100.409(2)^\circ$ ,  $V = 1746.3(4)\text{\AA}^3$ ; Space group: P-1;  $Z = 2$ ;  $D_{calc} = 1.258\text{ g/cm}^3$ ;  $F_{000} = 700$ ; Diffractometer: Rigaku AFC7R; Residuals: R;  $R_w = 0.0733, 0.1969$ .

Table 1. Crystal data and structure refinement for cd2931.

|                                   |                                                                                                                                          |
|-----------------------------------|------------------------------------------------------------------------------------------------------------------------------------------|
| Identification code               | cd2931                                                                                                                                   |
| Empirical formula                 | C43 H42 Cl2 O2                                                                                                                           |
| Formula weight                    | 661.67                                                                                                                                   |
| Temperature                       | 293(2) K                                                                                                                                 |
| Wavelength                        | 0.71073 Å                                                                                                                                |
| Crystal system, space group       | Triclinic, P-1                                                                                                                           |
| Unit cell dimensions              | a = 9.7469(12) Å    alpha = 90.102(2) deg.<br>b = 11.6130(14) Å    beta = 93.697(3) deg.<br>c = 15.7201(18) Å    gamma = 100.409(2) deg. |
| Volume                            | 1746.3(4) Å <sup>3</sup>                                                                                                                 |
| Z, Calculated density             | 2, 1.258 Mg/m <sup>3</sup>                                                                                                               |
| Absorption coefficient            | 0.222 mm <sup>-1</sup>                                                                                                                   |
| F(000)                            | 700                                                                                                                                      |
| Crystal size                      | 0.471 x 0.425 x 0.360 mm                                                                                                                 |
| Theta range for data collection   | 1.78 to 26.00 deg.                                                                                                                       |
| Limiting indices                  | -12<=h<=8, -14<=k<=14, -19<=l<=17                                                                                                        |
| Reflections collected / unique    | 9592 / 6727 [R(int) = 0.0800]                                                                                                            |
| Completeness to theta = 26.00     | 98.2 %                                                                                                                                   |
| Absorption correction             | Empirical                                                                                                                                |
| Max. and min. transmission        | 1.0000 and 0.8254                                                                                                                        |
| Refinement method                 | Full-matrix least-squares on F <sup>2</sup>                                                                                              |
| Data / restraints / parameters    | 6727 / 5 / 409                                                                                                                           |
| Goodness-of-fit on F <sup>2</sup> | 0.956                                                                                                                                    |
| Final R indices [I>2sigma(I)]     | R1 = 0.0733, wR2 = 0.1969                                                                                                                |
| R indices (all data)              | R1 = 0.1097, wR2 = 0.2209                                                                                                                |
| Largest diff. peak and hole       | 0.826 and -0.340 e.Å <sup>-3</sup>                                                                                                       |



Table 2. Atomic coordinates ( $\times 10^4$ ) and equivalent isotropic displacement parameters ( $\text{\AA}^2 \times 10^3$ ) for cd2931.  $U(\text{eq})$  is defined as one third of the trace of the orthogonalized  $U_{ij}$  tensor.

|       | x        | y        | z       | U(eq)  |
|-------|----------|----------|---------|--------|
| C1(1) | -442(1)  | 7180(1)  | 3580(1) | 65(1)  |
| C1(2) | -733(2)  | 12031(1) | 1226(1) | 89(1)  |
| O(1)  | 2709(4)  | 5494(4)  | 807(2)  | 102(1) |
| O(2)  | 3725(4)  | 4067(3)  | 1298(2) | 92(1)  |
| C(1)  | 2577(4)  | 7366(3)  | 2241(2) | 43(1)  |
| C(2)  | 3865(4)  | 8299(3)  | 2289(2) | 47(1)  |
| C(3)  | 4663(4)  | 8183(3)  | 3159(2) | 48(1)  |
| C(4)  | 3891(4)  | 6999(3)  | 3426(2) | 43(1)  |
| C(5)  | 3068(4)  | 6305(3)  | 2669(2) | 42(1)  |
| C(6)  | 2109(4)  | 5347(3)  | 3109(2) | 40(1)  |
| C(7)  | 2404(4)  | 5474(3)  | 3988(2) | 44(1)  |
| C(8)  | 3515(4)  | 6519(3)  | 4178(2) | 43(1)  |
| C(9)  | 1718(4)  | 4682(3)  | 4548(2) | 51(1)  |
| C(10) | 738(4)   | 3756(3)  | 4207(3) | 56(1)  |
| C(11) | 469(4)   | 3587(3)  | 3348(3) | 54(1)  |
| C(12) | 1173(4)  | 4384(3)  | 2780(2) | 48(1)  |
| C(13) | 1260(4)  | 7501(3)  | 2031(2) | 41(1)  |
| C(14) | 34(4)    | 6518(3)  | 1993(2) | 44(1)  |
| C(15) | -335(4)  | 5813(3)  | 1276(2) | 54(1)  |
| C(16) | -1523(5) | 4955(4)  | 1229(3) | 63(1)  |
| C(17) | -2372(5) | 4775(4)  | 1909(3) | 67(1)  |
| C(18) | -2040(4) | 5452(4)  | 2619(3) | 60(1)  |
| C(19) | -853(4)  | 6334(3)  | 2662(2) | 47(1)  |
| C(20) | 831(4)   | 8651(3)  | 1817(2) | 44(1)  |
| C(21) | -181(4)  | 8724(3)  | 1167(2) | 54(1)  |
| C(22) | -649(4)  | 9749(4)  | 978(3)  | 60(1)  |
| C(23) | -115(5)  | 10728(3) | 1446(3) | 58(1)  |
| C(24) | 873(5)   | 10707(4) | 2108(3) | 67(1)  |
| C(25) | 1337(5)  | 9675(4)  | 2286(3) | 59(1)  |
| C(26) | 4270(4)  | 9005(4)  | 1641(2) | 55(1)  |
| C(27) | 5543(5)  | 9993(4)  | 1711(3) | 77(1)  |
| C(28) | 3511(5)  | 8928(4)  | 775(2)  | 69(1)  |
| C(29) | 6233(4)  | 8173(4)  | 3121(3) | 67(1)  |
| C(30) | 4464(5)  | 9146(3)  | 3791(2) | 60(1)  |
| C(31) | 4043(4)  | 6871(3)  | 5057(2) | 46(1)  |
| C(32) | 5380(5)  | 6808(4)  | 5355(3) | 72(1)  |
| C(33) | 5830(6)  | 7088(5)  | 6191(3) | 84(2)  |
| C(34) | 4967(6)  | 7439(4)  | 6740(3) | 73(1)  |
| C(35) | 3631(5)  | 7498(4)  | 6461(3) | 74(1)  |
| C(36) | 3164(5)  | 7218(4)  | 5632(3) | 64(1)  |
| C(37) | 4086(4)  | 5772(3)  | 2135(2) | 52(1)  |
| C(38) | 3407(5)  | 5118(4)  | 1349(3) | 62(1)  |
| C(39) | 3108(9)  | 3374(8)  | 557(5)  | 170(4) |
| C(40) | 4025(13) | 2794(10) | 184(7)  | 171(5) |
| C(41) | 1235(9)  | 609(7)   | 4669(5) | 141(3) |
| C(42) | 1384(8)  | -293(6)  | 5166(5) | 122(2) |
| C(43) | 509(10)  | -458(8)  | 5731(5) | 150(3) |

Table 3. Bond lengths [Å] and angles [deg] for cd2931.

|              |          |
|--------------|----------|
| C1(1)-C(19)  | 1.728(4) |
| C1(2)-C(23)  | 1.753(4) |
| O(1)-C(38)   | 1.190(5) |
| O(2)-C(38)   | 1.315(5) |
| O(2)-C(39)   | 1.449(6) |
| C(1)-C(13)   | 1.342(5) |
| C(1)-C(2)    | 1.501(5) |
| C(1)-C(5)    | 1.541(5) |
| C(2)-C(26)   | 1.343(5) |
| C(2)-C(3)    | 1.548(5) |
| C(3)-C(4)    | 1.517(5) |
| C(3)-C(29)   | 1.537(5) |
| C(3)-C(30)   | 1.540(5) |
| C(4)-C(8)    | 1.352(5) |
| C(4)-C(5)    | 1.533(5) |
| C(5)-C(6)    | 1.516(5) |
| C(5)-C(37)   | 1.549(5) |
| C(6)-C(12)   | 1.386(5) |
| C(6)-C(7)    | 1.395(5) |
| C(7)-C(9)    | 1.388(5) |
| C(7)-C(8)    | 1.490(5) |
| C(8)-C(31)   | 1.472(5) |
| C(9)-C(10)   | 1.384(6) |
| C(9)-H(9)    | 0.9300   |
| C(10)-C(11)  | 1.367(5) |
| C(10)-H(10)  | 0.9300   |
| C(11)-C(12)  | 1.406(5) |
| C(11)-H(11)  | 0.9300   |
| C(12)-H(12)  | 0.9300   |
| C(13)-C(14)  | 1.493(5) |
| C(13)-C(20)  | 1.502(5) |
| C(14)-C(15)  | 1.381(5) |
| C(14)-C(19)  | 1.397(5) |
| C(15)-C(16)  | 1.383(6) |
| C(15)-H(15)  | 0.9300   |
| C(16)-C(17)  | 1.387(6) |
| C(16)-H(16)  | 0.9300   |
| C(17)-C(18)  | 1.352(6) |
| C(17)-H(17)  | 0.9300   |
| C(18)-C(19)  | 1.398(5) |
| C(18)-H(18)  | 0.9300   |
| C(20)-C(21)  | 1.387(5) |
| C(20)-C(25)  | 1.393(5) |
| C(21)-C(22)  | 1.375(5) |
| C(21)-H(21)  | 0.9300   |
| C(22)-C(23)  | 1.356(5) |
| C(22)-H(22)  | 0.9300   |
| C(23)-C(24)  | 1.375(6) |
| C(24)-C(25)  | 1.378(5) |
| C(24)-H(24)  | 0.9300   |
| C(25)-H(25)  | 0.9300   |
| C(26)-C(28)  | 1.501(6) |
| C(26)-C(27)  | 1.528(6) |
| C(27)-H(27A) | 0.9600   |
| C(27)-H(27B) | 0.9600   |
| C(27)-H(27C) | 0.9600   |
| C(28)-H(28A) | 0.9600   |
| C(28)-H(28B) | 0.9600   |
| C(28)-H(28C) | 0.9600   |
| C(29)-H(29A) | 0.9600   |
| C(29)-H(29B) | 0.9600   |
| C(29)-H(29C) | 0.9600   |
| C(30)-H(30A) | 0.9600   |
| C(30)-H(30B) | 0.9600   |
| C(30)-H(30C) | 0.9600   |
| C(31)-C(32)  | 1.370(6) |
| C(31)-C(36)  | 1.392(5) |
| C(32)-C(33)  | 1.378(6) |

---

|                   |           |
|-------------------|-----------|
| C(32)-H(32)       | 0.9300    |
| C(33)-C(34)       | 1.354(7)  |
| C(33)-H(33)       | 0.9300    |
| C(34)-C(35)       | 1.360(7)  |
| C(34)-H(34)       | 0.9300    |
| C(35)-C(36)       | 1.372(6)  |
| C(35)-H(35)       | 0.9300    |
| C(36)-H(36)       | 0.9300    |
| C(37)-C(38)       | 1.500(6)  |
| C(37)-H(37A)      | 0.9700    |
| C(37)-H(37B)      | 0.9700    |
| C(39)-C(40)       | 1.372(11) |
| C(39)-H(39A)      | 0.9700    |
| C(39)-H(39B)      | 0.9700    |
| C(40)-H(40A)      | 0.9600    |
| C(40)-H(40B)      | 0.9600    |
| C(40)-H(40C)      | 0.9600    |
| C(41)-C(42)       | 1.332(9)  |
| C(42)-C(43)       | 1.262(9)  |
|                   |           |
| C(38)-O(2)-C(39)  | 115.4(4)  |
| C(13)-C(1)-C(2)   | 127.2(3)  |
| C(13)-C(1)-C(5)   | 127.7(3)  |
| C(2)-C(1)-C(5)    | 103.9(3)  |
| C(26)-C(2)-C(1)   | 124.0(3)  |
| C(26)-C(2)-C(3)   | 128.3(4)  |
| C(1)-C(2)-C(3)    | 107.4(3)  |
| C(4)-C(3)-C(29)   | 110.8(3)  |
| C(4)-C(3)-C(30)   | 110.5(3)  |
| C(29)-C(3)-C(30)  | 109.2(3)  |
| C(4)-C(3)-C(2)    | 99.8(3)   |
| C(29)-C(3)-C(2)   | 115.3(3)  |
| C(30)-C(3)-C(2)   | 111.1(3)  |
| C(8)-C(4)-C(3)    | 134.7(3)  |
| C(8)-C(4)-C(5)    | 111.7(3)  |
| C(3)-C(4)-C(5)    | 111.8(3)  |
| C(6)-C(5)-C(4)    | 102.1(3)  |
| C(6)-C(5)-C(1)    | 123.8(3)  |
| C(4)-C(5)-C(1)    | 95.6(3)   |
| C(6)-C(5)-C(37)   | 110.5(3)  |
| C(4)-C(5)-C(37)   | 109.3(3)  |
| C(1)-C(5)-C(37)   | 112.9(3)  |
| C(12)-C(6)-C(7)   | 120.0(3)  |
| C(12)-C(6)-C(5)   | 131.0(3)  |
| C(7)-C(6)-C(5)    | 108.7(3)  |
| C(9)-C(7)-C(6)    | 121.1(3)  |
| C(9)-C(7)-C(8)    | 129.0(3)  |
| C(6)-C(7)-C(8)    | 109.9(3)  |
| C(4)-C(8)-C(31)   | 130.4(3)  |
| C(4)-C(8)-C(7)    | 107.5(3)  |
| C(31)-C(8)-C(7)   | 122.1(3)  |
| C(10)-C(9)-C(7)   | 117.9(3)  |
| C(10)-C(9)-H(9)   | 121.0     |
| C(7)-C(9)-H(9)    | 121.0     |
| C(11)-C(10)-C(9)  | 122.1(4)  |
| C(11)-C(10)-H(10) | 119.0     |
| C(9)-C(10)-H(10)  | 119.0     |
| C(10)-C(11)-C(12) | 120.0(4)  |
| C(10)-C(11)-H(11) | 120.0     |
| C(12)-C(11)-H(11) | 120.0     |
| C(6)-C(12)-C(11)  | 118.8(3)  |
| C(6)-C(12)-H(12)  | 120.6     |
| C(11)-C(12)-H(12) | 120.6     |
| C(1)-C(13)-C(14)  | 123.7(3)  |
| C(1)-C(13)-C(20)  | 124.6(3)  |
| C(14)-C(13)-C(20) | 111.7(3)  |
| C(15)-C(14)-C(19) | 117.1(4)  |
| C(15)-C(14)-C(13) | 121.9(3)  |
| C(19)-C(14)-C(13) | 120.8(3)  |
| C(14)-C(15)-C(16) | 121.3(4)  |
| C(14)-C(15)-H(15) | 119.3     |
| C(16)-C(15)-H(15) | 119.3     |

---

|                     |          |
|---------------------|----------|
| C(15)-C(16)-C(17)   | 120.4(4) |
| C(15)-C(16)-H(16)   | 119.8    |
| C(17)-C(16)-H(16)   | 119.8    |
| C(18)-C(17)-C(16)   | 119.7(4) |
| C(18)-C(17)-H(17)   | 120.2    |
| C(16)-C(17)-H(17)   | 120.2    |
| C(17)-C(18)-C(19)   | 120.0(4) |
| C(17)-C(18)-H(18)   | 120.0    |
| C(19)-C(18)-H(18)   | 120.0    |
| C(14)-C(19)-C(18)   | 121.5(4) |
| C(14)-C(19)-C1(1)   | 119.3(3) |
| C(18)-C(19)-C1(1)   | 119.1(3) |
| C(21)-C(20)-C(25)   | 116.2(3) |
| C(21)-C(20)-C(13)   | 120.9(3) |
| C(25)-C(20)-C(13)   | 122.8(3) |
| C(22)-C(21)-C(20)   | 122.6(4) |
| C(22)-C(21)-H(21)   | 118.7    |
| C(20)-C(21)-H(21)   | 118.7    |
| C(23)-C(22)-C(21)   | 119.2(4) |
| C(23)-C(22)-H(22)   | 120.4    |
| C(21)-C(22)-H(22)   | 120.4    |
| C(22)-C(23)-C(24)   | 121.0(4) |
| C(22)-C(23)-C1(2)   | 119.6(3) |
| C(24)-C(23)-C1(2)   | 119.4(3) |
| C(23)-C(24)-C(25)   | 119.1(4) |
| C(23)-C(24)-H(24)   | 120.5    |
| C(25)-C(24)-H(24)   | 120.5    |
| C(24)-C(25)-C(20)   | 122.0(4) |
| C(24)-C(25)-H(25)   | 119.0    |
| C(20)-C(25)-H(25)   | 119.0    |
| C(2)-C(26)-C(28)    | 123.9(4) |
| C(2)-C(26)-C(27)    | 123.5(4) |
| C(28)-C(26)-C(27)   | 112.6(3) |
| C(26)-C(27)-H(27A)  | 109.5    |
| C(26)-C(27)-H(27B)  | 109.5    |
| H(27A)-C(27)-H(27B) | 109.5    |
| C(26)-C(27)-H(27C)  | 109.5    |
| H(27A)-C(27)-H(27C) | 109.5    |
| H(27B)-C(27)-H(27C) | 109.5    |
| C(26)-C(28)-H(28A)  | 109.5    |
| C(26)-C(28)-H(28B)  | 109.5    |
| H(28A)-C(28)-H(28B) | 109.5    |
| C(26)-C(28)-H(28C)  | 109.5    |
| H(28A)-C(28)-H(28C) | 109.5    |
| H(28B)-C(28)-H(28C) | 109.5    |
| C(3)-C(29)-H(29A)   | 109.5    |
| C(3)-C(29)-H(29B)   | 109.5    |
| H(29A)-C(29)-H(29B) | 109.5    |
| C(3)-C(29)-H(29C)   | 109.5    |
| H(29A)-C(29)-H(29C) | 109.5    |
| H(29B)-C(29)-H(29C) | 109.5    |
| C(3)-C(30)-H(30A)   | 109.5    |
| C(3)-C(30)-H(30B)   | 109.5    |
| H(30A)-C(30)-H(30B) | 109.5    |
| C(3)-C(30)-H(30C)   | 109.5    |
| H(30A)-C(30)-H(30C) | 109.5    |
| H(30B)-C(30)-H(30C) | 109.5    |
| C(32)-C(31)-C(36)   | 117.4(4) |
| C(32)-C(31)-C(8)    | 121.9(3) |
| C(36)-C(31)-C(8)    | 120.6(4) |
| C(31)-C(32)-C(33)   | 120.9(4) |
| C(31)-C(32)-H(32)   | 119.6    |
| C(33)-C(32)-H(32)   | 119.6    |
| C(34)-C(33)-C(32)   | 120.9(5) |
| C(34)-C(33)-H(33)   | 119.5    |
| C(32)-C(33)-H(33)   | 119.5    |
| C(33)-C(34)-C(35)   | 119.3(4) |
| C(33)-C(34)-H(34)   | 120.4    |
| C(35)-C(34)-H(34)   | 120.4    |
| C(34)-C(35)-C(36)   | 120.6(4) |
| C(34)-C(35)-H(35)   | 119.7    |
| C(36)-C(35)-H(35)   | 119.7    |

---

|                     |          |
|---------------------|----------|
| C(35)-C(36)-C(31)   | 120.9(4) |
| C(35)-C(36)-H(36)   | 119.5    |
| C(31)-C(36)-H(36)   | 119.5    |
| C(38)-C(37)-C(5)    | 114.2(3) |
| C(38)-C(37)-H(37A)  | 108.7    |
| C(5)-C(37)-H(37A)   | 108.7    |
| C(38)-C(37)-H(37B)  | 108.7    |
| C(5)-C(37)-H(37B)   | 108.7    |
| H(37A)-C(37)-H(37B) | 107.6    |
| O(1)-C(38)-O(2)     | 122.4(4) |
| O(1)-C(38)-C(37)    | 125.6(4) |
| O(2)-C(38)-C(37)    | 111.9(4) |
| C(40)-C(39)-O(2)    | 113.3(7) |
| C(40)-C(39)-H(39A)  | 108.9    |
| O(2)-C(39)-H(39A)   | 108.9    |
| C(40)-C(39)-H(39B)  | 108.9    |
| O(2)-C(39)-H(39B)   | 108.9    |
| H(39A)-C(39)-H(39B) | 107.7    |
| C(39)-C(40)-H(40A)  | 109.5    |
| C(39)-C(40)-H(40B)  | 109.5    |
| H(40A)-C(40)-H(40B) | 109.5    |
| C(39)-C(40)-H(40C)  | 109.5    |
| H(40A)-C(40)-H(40C) | 109.5    |
| H(40B)-C(40)-H(40C) | 109.5    |
| C(42)-C(41)-C(43)#1 | 109.6(7) |
| C(43)-C(42)-C(41)   | 112.8(8) |
| C(42)-C(43)-C(41)#1 | 114.1(7) |

---

Symmetry transformations used to generate equivalent atoms:  
#1 -x, -y, -z+1

Table 4. Anisotropic displacement parameters ( $\text{\AA}^2 \times 10^3$ ) for cd2931.  
 The anisotropic displacement factor exponent takes the form:  
 $-2 \pi^2 [ h^2 a^{*2} U_{11} + \dots + 2 h k a^* b^* U_{12} ]$

|       | U11    | U22    | U33    | U23     | U13    | U12   |
|-------|--------|--------|--------|---------|--------|-------|
| C1(1) | 67(1)  | 82(1)  | 49(1)  | -2(1)   | 12(1)  | 20(1) |
| C1(2) | 108(1) | 57(1)  | 107(1) | 3(1)    | -26(1) | 37(1) |
| O(1)  | 121(3) | 152(3) | 50(2)  | -21(2)  | -21(2) | 82(3) |
| O(2)  | 104(3) | 91(2)  | 88(2)  | -43(2)  | -30(2) | 50(2) |
| C(1)  | 44(2)  | 49(2)  | 39(2)  | 3(2)    | 4(2)   | 15(2) |
| C(2)  | 41(2)  | 54(2)  | 47(2)  | 2(2)    | 8(2)   | 12(2) |
| C(3)  | 41(2)  | 50(2)  | 53(2)  | 4(2)    | 2(2)   | 9(2)  |
| C(4)  | 36(2)  | 52(2)  | 44(2)  | 1(2)    | -3(2)  | 16(2) |
| C(5)  | 39(2)  | 51(2)  | 38(2)  | 2(2)    | 1(2)   | 13(2) |
| C(6)  | 40(2)  | 42(2)  | 42(2)  | 1(2)    | -2(2)  | 18(2) |
| C(7)  | 44(2)  | 46(2)  | 43(2)  | 3(2)    | 0(2)   | 17(2) |
| C(8)  | 44(2)  | 49(2)  | 40(2)  | -1(2)   | -2(2)  | 18(2) |
| C(9)  | 60(3)  | 54(2)  | 41(2)  | 6(2)    | 4(2)   | 15(2) |
| C(10) | 59(3)  | 53(2)  | 56(2)  | 10(2)   | 6(2)   | 8(2)  |
| C(11) | 52(2)  | 45(2)  | 62(3)  | 4(2)    | -5(2)  | 6(2)  |
| C(12) | 53(2)  | 49(2)  | 45(2)  | -1(2)   | -5(2)  | 18(2) |
| C(13) | 43(2)  | 50(2)  | 33(2)  | 3(2)    | 3(2)   | 13(2) |
| C(14) | 43(2)  | 50(2)  | 43(2)  | 5(2)    | -2(2)  | 20(2) |
| C(15) | 64(3)  | 53(2)  | 46(2)  | -3(2)   | -3(2)  | 21(2) |
| C(16) | 68(3)  | 54(2)  | 65(3)  | -4(2)   | -21(2) | 14(2) |
| C(17) | 52(3)  | 54(3)  | 92(3)  | 12(2)   | -11(2) | 4(2)  |
| C(18) | 45(2)  | 64(3)  | 72(3)  | 15(2)   | 7(2)   | 12(2) |
| C(19) | 41(2)  | 54(2)  | 47(2)  | 7(2)    | 2(2)   | 16(2) |
| C(20) | 44(2)  | 48(2)  | 43(2)  | 6(2)    | 5(2)   | 13(2) |
| C(21) | 57(3)  | 50(2)  | 55(2)  | -2(2)   | -9(2)  | 14(2) |
| C(22) | 60(3)  | 56(3)  | 64(3)  | 8(2)    | -11(2) | 17(2) |
| C(23) | 66(3)  | 47(2)  | 64(3)  | 3(2)    | -3(2)  | 19(2) |
| C(24) | 73(3)  | 54(2)  | 77(3)  | -5(2)   | -12(2) | 22(2) |
| C(25) | 65(3)  | 60(3)  | 54(2)  | -1(2)   | -8(2)  | 21(2) |
| C(26) | 53(2)  | 60(2)  | 55(2)  | 9(2)    | 14(2)  | 14(2) |
| C(27) | 74(3)  | 76(3)  | 78(3)  | 12(2)   | 17(3)  | -2(3) |
| C(28) | 71(3)  | 85(3)  | 52(2)  | 17(2)   | 18(2)  | 14(2) |
| C(29) | 47(3)  | 77(3)  | 77(3)  | 11(2)   | 1(2)   | 10(2) |
| C(30) | 68(3)  | 53(2)  | 58(2)  | 4(2)    | -3(2)  | 9(2)  |
| C(31) | 53(2)  | 44(2)  | 40(2)  | 4(2)    | -2(2)  | 11(2) |
| C(32) | 69(3)  | 100(4) | 55(3)  | -10(2)  | -11(2) | 44(3) |
| C(33) | 86(4)  | 103(4) | 67(3)  | -11(3)  | -28(3) | 39(3) |
| C(34) | 98(4)  | 69(3)  | 47(2)  | -3(2)   | -11(3) | 10(3) |
| C(35) | 78(3)  | 85(3)  | 56(3)  | -12(2)  | 11(2)  | 6(3)  |
| C(36) | 59(3)  | 82(3)  | 51(2)  | -11(2)  | 5(2)   | 10(2) |
| C(37) | 51(2)  | 60(2)  | 47(2)  | -3(2)   | 3(2)   | 24(2) |
| C(38) | 58(3)  | 85(3)  | 51(2)  | -7(2)   | 4(2)   | 33(2) |
| C(39) | 148(7) | 201(8) | 174(7) | -125(7) | -70(6) | 97(6) |

Table 5. Hydrogen coordinates ( $\times 10^4$ ) and isotropic displacement parameters ( $\text{\AA}^2 \times 10^3$ ) for cd2931.

|        | x     | y     | z    | U(eq) |
|--------|-------|-------|------|-------|
| H(9)   | 1910  | 4770  | 5134 | 61    |
| H(10)  | 247   | 3232  | 4575 | 68    |
| H(11)  | -180  | 2946  | 3138 | 65    |
| H(12)  | 1013  | 4266  | 2194 | 58    |
| H(15)  | 226   | 5919  | 816  | 64    |
| H(16)  | -1754 | 4494  | 738  | 75    |
| H(17)  | -3166 | 4192  | 1876 | 81    |
| H(18)  | -2602 | 5331  | 3079 | 72    |
| H(21)  | -557  | 8055  | 846  | 65    |
| H(22)  | -1324 | 9769  | 535  | 72    |
| H(24)  | 1223  | 11380 | 2432 | 81    |
| H(25)  | 2009  | 9663  | 2732 | 71    |
| H(27A) | 5811  | 10173 | 2302 | 116   |
| H(27B) | 5313  | 10675 | 1434 | 116   |
| H(27C) | 6303  | 9751  | 1443 | 116   |
| H(28A) | 2866  | 8198  | 717  | 103   |
| H(28B) | 4173  | 8973  | 345  | 103   |
| H(28C) | 3007  | 9564  | 711  | 103   |
| H(29A) | 6595  | 7920  | 3657 | 101   |
| H(29B) | 6715  | 8947  | 3004 | 101   |
| H(29C) | 6369  | 7645  | 2676 | 101   |
| H(30A) | 3489  | 9076  | 3885 | 90    |
| H(30B) | 4801  | 9900  | 3559 | 90    |
| H(30C) | 4978  | 9060  | 4322 | 90    |
| H(32)  | 5991  | 6574  | 4988 | 86    |
| H(33)  | 6739  | 7035  | 6382 | 101   |
| H(34)  | 5284  | 7637  | 7301 | 87    |
| H(35)  | 3030  | 7730  | 6836 | 88    |
| H(36)  | 2247  | 7261  | 5451 | 77    |
| H(37A) | 4816  | 6398  | 1968 | 62    |
| H(37B) | 4528  | 5244  | 2491 | 62    |
| H(39A) | 2317  | 2807  | 724  | 204   |
| H(39B) | 2759  | 3885  | 140  | 204   |
| H(40A) | 4757  | 3352  | -43  | 281   |
| H(40B) | 3538  | 2297  | -269 | 281   |
| H(40C) | 4423  | 2327  | 602  | 281   |

Table 6. Torsion angles [deg] for cd2931.

|                         |           |
|-------------------------|-----------|
| C(13)-C(1)-C(2)-C(26)   | -55.7(5)  |
| C(5)-C(1)-C(2)-C(26)    | 136.1(4)  |
| C(13)-C(1)-C(2)-C(3)    | 130.3(4)  |
| C(5)-C(1)-C(2)-C(3)     | -37.9(3)  |
| C(26)-C(2)-C(3)-C(4)    | -161.2(4) |
| C(1)-C(2)-C(3)-C(4)     | 12.6(3)   |
| C(26)-C(2)-C(3)-C(29)   | -42.5(5)  |
| C(1)-C(2)-C(3)-C(29)    | 131.2(3)  |
| C(26)-C(2)-C(3)-C(30)   | 82.3(5)   |
| C(1)-C(2)-C(3)-C(30)    | -104.0(3) |
| C(29)-C(3)-C(4)-C(8)    | 93.1(5)   |
| C(30)-C(3)-C(4)-C(8)    | -28.0(6)  |
| C(2)-C(3)-C(4)-C(8)     | -145.0(4) |
| C(29)-C(3)-C(4)-C(5)    | -104.2(4) |
| C(30)-C(3)-C(4)-C(5)    | 134.7(3)  |
| C(2)-C(3)-C(4)-C(5)     | 17.7(4)   |
| C(8)-C(4)-C(5)-C(6)     | 1.4(4)    |
| C(3)-C(4)-C(5)-C(6)     | -165.4(3) |
| C(8)-C(4)-C(5)-C(1)     | 127.8(3)  |
| C(3)-C(4)-C(5)-C(1)     | -39.1(3)  |
| C(8)-C(4)-C(5)-C(37)    | -115.6(3) |
| C(3)-C(4)-C(5)-C(37)    | 77.6(3)   |
| C(13)-C(1)-C(5)-C(6)    | -14.9(5)  |
| C(2)-C(1)-C(5)-C(6)     | 153.3(3)  |
| C(13)-C(1)-C(5)-C(4)    | -123.5(4) |
| C(2)-C(1)-C(5)-C(4)     | 44.6(3)   |
| C(13)-C(1)-C(5)-C(37)   | 122.8(4)  |
| C(2)-C(1)-C(5)-C(37)    | -69.1(3)  |
| C(4)-C(5)-C(6)-C(12)    | -174.7(3) |
| C(1)-C(5)-C(6)-C(12)    | 79.9(5)   |
| C(37)-C(5)-C(6)-C(12)   | -58.6(5)  |
| C(4)-C(5)-C(6)-C(7)     | -1.9(3)   |
| C(1)-C(5)-C(6)-C(7)     | -107.2(4) |
| C(37)-C(5)-C(6)-C(7)    | 114.3(3)  |
| C(12)-C(6)-C(7)-C(9)    | -3.5(5)   |
| C(5)-C(6)-C(7)-C(9)     | -177.3(3) |
| C(12)-C(6)-C(7)-C(8)    | 175.5(3)  |
| C(5)-C(6)-C(7)-C(8)     | 1.8(4)    |
| C(3)-C(4)-C(8)-C(31)    | -18.7(7)  |
| C(5)-C(4)-C(8)-C(31)    | 178.5(3)  |
| C(3)-C(4)-C(8)-C(7)     | 162.3(4)  |
| C(5)-C(4)-C(8)-C(7)     | -0.4(4)   |
| C(9)-C(7)-C(8)-C(4)     | 178.1(4)  |
| C(6)-C(7)-C(8)-C(4)     | -0.9(4)   |
| C(9)-C(7)-C(8)-C(31)    | -0.9(6)   |
| C(6)-C(7)-C(8)-C(31)    | -179.9(3) |
| C(6)-C(7)-C(9)-C(10)    | 0.5(5)    |
| C(8)-C(7)-C(9)-C(10)    | -178.4(3) |
| C(7)-C(9)-C(10)-C(11)   | 2.1(6)    |
| C(9)-C(10)-C(11)-C(12)  | -1.5(6)   |
| C(7)-C(6)-C(12)-C(11)   | 4.0(5)    |
| C(5)-C(6)-C(12)-C(11)   | 176.2(3)  |
| C(10)-C(11)-C(12)-C(6)  | -1.5(5)   |
| C(2)-C(1)-C(13)-C(14)   | 179.5(3)  |
| C(5)-C(1)-C(13)-C(14)   | -15.0(5)  |
| C(2)-C(1)-C(13)-C(20)   | -1.3(5)   |
| C(5)-C(1)-C(13)-C(20)   | 164.2(3)  |
| C(1)-C(13)-C(14)-C(15)  | -84.8(4)  |
| C(20)-C(13)-C(14)-C(15) | 95.9(4)   |
| C(1)-C(13)-C(14)-C(19)  | 100.3(4)  |
| C(20)-C(13)-C(14)-C(19) | -79.0(4)  |
| C(19)-C(14)-C(15)-C(16) | -0.7(5)   |
| C(13)-C(14)-C(15)-C(16) | -175.9(3) |
| C(14)-C(15)-C(16)-C(17) | -0.4(6)   |
| C(15)-C(16)-C(17)-C(18) | 0.5(6)    |
| C(16)-C(17)-C(18)-C(19) | 0.5(6)    |
| C(15)-C(14)-C(19)-C(18) | 1.8(5)    |
| C(13)-C(14)-C(19)-C(18) | 177.0(3)  |



---

|                           |           |
|---------------------------|-----------|
| C(15)-C(14)-C(19)-C1(1)   | 179.6(3)  |
| C(13)-C(14)-C(19)-C1(1)   | -5.3(5)   |
| C(17)-C(18)-C(19)-C(14)   | -1.8(6)   |
| C(17)-C(18)-C(19)-C1(1)   | -179.5(3) |
| C(1)-C(13)-C(20)-C(21)    | 140.7(4)  |
| C(14)-C(13)-C(20)-C(21)   | -40.1(4)  |
| C(1)-C(13)-C(20)-C(25)    | -43.9(5)  |
| C(14)-C(13)-C(20)-C(25)   | 135.4(4)  |
| C(25)-C(20)-C(21)-C(22)   | 1.1(6)    |
| C(13)-C(20)-C(21)-C(22)   | 176.9(4)  |
| C(20)-C(21)-C(22)-C(23)   | -0.4(6)   |
| C(21)-C(22)-C(23)-C(24)   | -0.7(7)   |
| C(21)-C(22)-C(23)-C1(2)   | -178.6(3) |
| C(22)-C(23)-C(24)-C(25)   | 1.1(7)    |
| C1(2)-C(23)-C(24)-C(25)   | 179.0(3)  |
| C(23)-C(24)-C(25)-C(20)   | -0.3(7)   |
| C(21)-C(20)-C(25)-C(24)   | -0.7(6)   |
| C(13)-C(20)-C(25)-C(24)   | -176.4(4) |
| C(1)-C(2)-C(26)-C(28)     | -2.0(6)   |
| C(3)-C(2)-C(26)-C(28)     | 170.8(4)  |
| C(1)-C(2)-C(26)-C(27)     | 176.8(4)  |
| C(3)-C(2)-C(26)-C(27)     | -10.5(6)  |
| C(4)-C(8)-C(31)-C(32)     | -66.4(5)  |
| C(7)-C(8)-C(31)-C(32)     | 112.4(4)  |
| C(4)-C(8)-C(31)-C(36)     | 117.3(5)  |
| C(7)-C(8)-C(31)-C(36)     | -63.9(5)  |
| C(36)-C(31)-C(32)-C(33)   | -0.4(7)   |
| C(8)-C(31)-C(32)-C(33)    | -176.8(4) |
| C(31)-C(32)-C(33)-C(34)   | -0.4(8)   |
| C(32)-C(33)-C(34)-C(35)   | 1.0(8)    |
| C(33)-C(34)-C(35)-C(36)   | -0.7(7)   |
| C(34)-C(35)-C(36)-C(31)   | -0.2(7)   |
| C(32)-C(31)-C(36)-C(35)   | 0.7(6)    |
| C(8)-C(31)-C(36)-C(35)    | 177.2(4)  |
| C(6)-C(5)-C(37)-C(38)     | 71.2(4)   |
| C(4)-C(5)-C(37)-C(38)     | -177.2(3) |
| C(1)-C(5)-C(37)-C(38)     | -72.1(4)  |
| C(39)-O(2)-C(38)-O(1)     | -3.0(8)   |
| C(39)-O(2)-C(38)-C(37)    | 179.9(5)  |
| C(5)-C(37)-C(38)-O(1)     | 53.8(6)   |
| C(5)-C(37)-C(38)-O(2)     | -129.3(4) |
| C(38)-O(2)-C(39)-C(40)    | 136.7(9)  |
| C(43)#1-C(41)-C(42)-C(43) | -51.7(10) |
| C(41)-C(42)-C(43)-C(41)#1 | 54.1(10)  |

---

Symmetry transformations used to generate equivalent atoms:  
#1 -x,-y,-z+1

Table 7. Hydrogen bonds for cd2931 [A and deg.].

---

| D-H...A | d(D-H) | d(H...A) | d(D...A) | <(DHA) |
|---------|--------|----------|----------|--------|
|---------|--------|----------|----------|--------|
